# Supplementary material for: New Deoxyisoaustamide Derivatives from the Coral-Derived Fungus Penicillium dimorphosporum KMM 4689
Source: PubMed Central journal article supplement (PMC7826743; doi:10.3390/md19010032), 2021-01-12
Supplement: marinedrugs-19-00032-s001.pdf [file marinedrugs-19-00032-s001.pdf]

## SUPPLEMENTARY MATERIAL

# New Deoxyisoaustamide Derivatives from the Coral-Derived Fungus *Penicillium dimorphosporum* KMM 4689

Olesya I. Zhuravleva<sup>1,2,\*</sup>, Alexandr S. Antonov<sup>1</sup>, Vo Thi Dieu Trang<sup>3</sup>, Mikhail V. Pivkin<sup>1</sup>, Yuliya V. Khudyakova<sup>1</sup>, Vladimir A. Denisenko<sup>1</sup>, Roman S. Popov<sup>1</sup>, Natalya Yu. Kim<sup>1</sup>, Ekaterina A. Yurchenko<sup>1</sup>, Andrey V. Gerasimenko<sup>4</sup>, Anatoly A. Udoenko<sup>4</sup>, Gunhild von Amsberg<sup>5,6</sup>, Sergey A. Dyshlovoy<sup>2,5,6</sup> and Shamil Sh. Afiyatullo<sup>1</sup>

<sup>1</sup> G.B. Elyakov Pacific Institute of Bioorganic Chemistry, Far Eastern Branch of the Russian Academy of Sciences, Prospect 100-letiya Vladivostoka, 159, Vladivostok 690022, Russia; anotonov\_as@piboc.dvo.ru(A.S.A.); pivkin\_mv@piboc.dvo.ru (M.V.P.); hudyakova\_yv@piboc.dvo.ru (Y.V.K); vladenis@pidoc.dvo.ru(V.A.D.); popov\_rs@piboc.dvo.ru (R.S.P.); kim\_ny@piboc.dvo.ru (N.Y.K.); eyurch@piboc.dvo.ru(E.A.Y.); afiyat@piboc.dvo.ru(S.S.A)

<sup>2</sup> School of Natural Science, Far Eastern Federal University, Sukhanova St., 8, Vladivostok 690000, Russia; s.dyshlovoy@uke.de

<sup>3</sup> Department of Marine Biotechnology, Nhatrang Institute of Technology Research and Application, Vietnam Academy of Science and Technology, Nha Trang 650000, Vietnam; votrang@nitra.vast.vn

<sup>4</sup> Institute of Chemistry, Far Eastern Branch of the Russian Academy of Sciences, Prospect 100-letiya Vladivostoka, 159, Vladivostok 690022, Russia; gerasimenko@ich.dvo.ru(A.V.G.); udoenko@ich.dvo.ru(A.A.U.)

<sup>5</sup> Laboratory of Experimental Oncology, Department of Oncology, Hematology and Bone Marrow Transplantation with Section Pneumology, Hubertus Wald-Tumorzentrum, University Medical Center Hamburg-Eppendorf, 20246 Hamburg, Germany; g.von-amsberg@uke.de

<sup>6</sup> Martini-Klinik Prostate Cancer Center, University Hospital Hamburg-Eppendorf, 20246 Hamburg, Germany

\* Correspondence: zhuravleva.oi@dvfu.ru; Tel.: +7-423-231-1168

**Abstract:** Seven new deoxyisoaustamide derivatives (1–7) together with known compounds (8–10) were isolated from the coral-derived fungus *Penicillium dimorphosporum* KMM 4689. Their structures were established using spectroscopic methods, X-ray diffraction analysis and by comparison with related known compounds. The absolute configurations of some alkaloids were determined based on CD and NOESY data as well as biogenetic considerations. The cytotoxic and neuroprotective activities of some of the isolated compounds were examined and structure-activity relationships were discussed.

**Keywords:** *Penicillium dimorphosporum*, secondary metabolites, prenylated indole diketopiperazines, deoxyisoaustamide, neuroprotective activity; paraquat.

## Content

|                                                                                            |    |
|--------------------------------------------------------------------------------------------|----|
| <b>Experimental Section</b> .....                                                          | 5  |
| Figure S1. CD spectrum of <b>1</b> .....                                                   | 5  |
| Figure S2. CD spectrum of <b>2</b> .....                                                   | 5  |
| Figure S3. CD spectrum of <b>3</b> .....                                                   | 6  |
| Figure S4. CD spectrum of <b>4</b> .....                                                   | 6  |
| Figure S5. CD spectrum of <b>5</b> .....                                                   | 7  |
| Figure S6. CD spectrum of <b>6</b> .....                                                   | 7  |
| Figure S7. CD spectrum of <b>7</b> .....                                                   | 8  |
| Figure S8. CD spectrum of <b>8</b> .....                                                   | 8  |
| Figure S9. CD spectrum of <b>9</b> .....                                                   | 9  |
| Figure S10. CD spectrum of <b>10</b> .....                                                 | 9  |
| Figure S11. UV spectrum of <b>1</b> .....                                                  | 10 |
| Figure S12. UV spectrum of <b>2</b> .....                                                  | 10 |
| Figure S13. UV spectrum of <b>3</b> .....                                                  | 11 |
| Figure S14. UV spectrum of <b>4</b> .....                                                  | 11 |
| Figure S15. UV spectrum of <b>5</b> .....                                                  | 12 |
| Figure S16. UV spectrum of <b>6</b> .....                                                  | 12 |
| Figure S17. UV spectrum of <b>7</b> .....                                                  | 13 |
| Figure S18. UV spectrum of <b>8</b> .....                                                  | 13 |
| Figure S19. UV spectrum of <b>9</b> .....                                                  | 14 |
| Figure S20. UV spectrum of <b>10</b> .....                                                 | 14 |
| Figure S21. <sup>1</sup> H NMR spectrum (500 MHz, DMSO-d <sub>6</sub> ) of <b>1</b> .....  | 15 |
| Figure S22. <sup>13</sup> C NMR spectrum (125 MHz, DMSO-d <sub>6</sub> ) of <b>1</b> ..... | 16 |
| Figure S23. DEPT-135 NMR spectrum (125 MHz, DMSO-d <sub>6</sub> ) of <b>1</b> .....        | 17 |
| Figure S24. COSY-45 spectrum (500 MHz, DMSO-d <sub>6</sub> ) of <b>1</b> .....             | 18 |
| Figure S25. HSQC spectrum (500 MHz, DMSO-d <sub>6</sub> ) of <b>1</b> .....                | 19 |
| Figure S26. HMBC spectrum (500 MHz, DMSO-d <sub>6</sub> ) of <b>1</b> .....                | 20 |
| Figure S27. NOESY spectrum (500 MHz, DMSO-d <sub>6</sub> ) of <b>1</b> .....               | 21 |
| Figure S28. <sup>1</sup> H NMR spectrum (700 MHz, DMSO-d <sub>6</sub> ) of <b>2</b> .....  | 22 |
| Figure S29. <sup>13</sup> C NMR spectrum (176 MHz, DMSO-d <sub>6</sub> ) of <b>2</b> ..... | 23 |
| Figure S30. DEPT-135 NMR spectrum (176 MHz, DMSO-d <sub>6</sub> ) of <b>2</b> .....        | 24 |
| Figure S31. COSY-45 spectrum (700 MHz, DMSO-d <sub>6</sub> ) of <b>2</b> .....             | 25 |
| Figure S32. HSQC spectrum (700 MHz, DMSO-d <sub>6</sub> ) of <b>2</b> .....                | 26 |
| Figure S33. HMBC spectrum (700 MHz, DMSO-d <sub>6</sub> ) of <b>2</b> .....                | 27 |
| Figure S34. NOESY spectrum (700 MHz, DMSO-d <sub>6</sub> ) of <b>2</b> .....               | 28 |
| Figure S35. <sup>1</sup> H NMR spectrum (700 MHz, CD <sub>3</sub> OD) of <b>3</b> .....    | 29 |
| Figure S36. <sup>13</sup> C NMR spectrum (176 MHz, CD <sub>3</sub> OD) of <b>3</b> .....   | 30 |

|                                                                                                             |    |
|-------------------------------------------------------------------------------------------------------------|----|
| Figure S37. DEPT-135 NMR spectrum (176 MHz, CD <sub>3</sub> OD) of <b>3</b> .....                           | 31 |
| Figure S38. COSY-45 spectrum (700 MHz, CD <sub>3</sub> OD) of <b>3</b> .....                                | 32 |
| Figure S39. HSQC spectrum (700 MHz, CD <sub>3</sub> OD) of <b>3</b> .....                                   | 33 |
| Figure S40. HMBC spectrum (700 MHz, CD <sub>3</sub> OD) of <b>3</b> .....                                   | 34 |
| Figure S41. NOESY spectrum (700 MHz, CD <sub>3</sub> OD) of <b>3</b> .....                                  | 35 |
| Figure S42. <sup>1</sup> H NMR spectrum (500 MHz, DMSO-d <sub>6</sub> ) of <b>4</b> .....                   | 36 |
| Figure S43. <sup>13</sup> C NMR spectrum (125 MHz, DMSO-d <sub>6</sub> ) of <b>4</b> .....                  | 37 |
| Figure S44. DEPT-135 NMR spectrum (125 MHz, DMSO-d <sub>6</sub> ) of <b>4</b> .....                         | 38 |
| Figure S45. COSY-45 spectrum (500 MHz, DMSO-d <sub>6</sub> ) of <b>4</b> .....                              | 39 |
| Figure S46. HSQC spectrum (500 MHz, DMSO-d <sub>6</sub> ) of <b>4</b> .....                                 | 40 |
| Figure S47. <sup>1</sup> H- <sup>13</sup> C HMBC spectrum (700 MHz, DMSO-d <sub>6</sub> ) of <b>4</b> ..... | 41 |
| Figure S48. <sup>1</sup> H- <sup>15</sup> N GHMBC spectrum (50 MHz, DMSO-d <sub>6</sub> ) of <b>4</b> ..... | 42 |
| Figure S49. NOESY spectrum (700 MHz, DMSO-d <sub>6</sub> ) of <b>4</b> .....                                | 43 |
| Figure S50. <sup>1</sup> H NMR spectrum (700 MHz, DMSO-d <sub>6</sub> ) of <b>5</b> .....                   | 44 |
| Figure S51. <sup>13</sup> C NMR spectrum (176 MHz, DMSO-d <sub>6</sub> ) of <b>5</b> .....                  | 45 |
| Figure S52. DEPT-135 NMR spectrum (176 MHz, DMSO-d <sub>6</sub> ) of <b>5</b> .....                         | 46 |
| Figure S53. COSY-45 spectrum (700 MHz, DMSO-d <sub>6</sub> ) of <b>5</b> .....                              | 47 |
| Figure S54. HSQC spectrum (700 MHz, DMSO-d <sub>6</sub> ) of <b>5</b> .....                                 | 48 |
| Figure S55. HMBC spectrum (700 MHz, DMSO-d <sub>6</sub> ) of <b>5</b> .....                                 | 49 |
| Figure S56. NOESY spectrum (700 MHz, DMSO-d <sub>6</sub> ) of <b>5</b> .....                                | 50 |
| Figure S57. <sup>1</sup> H NMR spectrum (500 MHz, CD <sub>3</sub> OD) of <b>6</b> .....                     | 51 |
| Figure S58. <sup>13</sup> C NMR spectrum (125 MHz, CD <sub>3</sub> OD) of <b>6</b> .....                    | 52 |
| Figure S59. DEPT-135 NMR spectrum (125 MHz, CD <sub>3</sub> OD) of <b>6</b> .....                           | 53 |
| Figure S60. COSY-45 spectrum (500 MHz, CD <sub>3</sub> OD) of <b>6</b> .....                                | 54 |
| Figure S61. HSQC spectrum (500 MHz, CD <sub>3</sub> OD) of <b>6</b> .....                                   | 55 |
| Figure S62. HMBC spectrum (500 MHz, CD <sub>3</sub> OD) of <b>6</b> .....                                   | 56 |
| Figure S63. NOESY spectrum (500 MHz, CD <sub>3</sub> OD) of <b>6</b> .....                                  | 57 |
| Figure S64. <sup>1</sup> H NMR spectrum (700 MHz, DMSO-d <sub>6</sub> ) of <b>7</b> .....                   | 58 |
| Figure S65. <sup>13</sup> C NMR spectrum (176 MHz, DMSO-d <sub>6</sub> ) of <b>7</b> .....                  | 59 |
| Figure S66. DEPT-135 NMR spectrum (176 MHz, DMSO-d <sub>6</sub> ) of <b>7</b> .....                         | 60 |
| Figure S67. COSY-45 spectrum (700 MHz, DMSO-d <sub>6</sub> ) of <b>7</b> .....                              | 61 |
| Figure S68. HSQC spectrum (700 MHz, DMSO-d <sub>6</sub> ) of <b>7</b> .....                                 | 62 |
| Figure S69. HMBC spectrum (700 MHz, DMSO-d <sub>6</sub> ) of <b>7</b> .....                                 | 63 |
| Figure S70. NOESY spectrum (700 MHz, DMSO-d <sub>6</sub> ) of <b>7</b> .....                                | 64 |
| Figure S71. Viability of human prostate PNT2 cells treated with the investigated compounds for 48 h. ....   | 65 |
| Table S1. Selected crystal data and refinement parameters for structure <b>1</b> .....                      | 66 |
| Table S2. Selected bond lengths (d, Å) in the structures <b>1</b> .....                                     | 67 |

|                                                       |    |
|-------------------------------------------------------|----|
| Table S3. Hydrogen bonds for structure <b>1</b> ..... | 68 |
|-------------------------------------------------------|----|



## Experimental Section

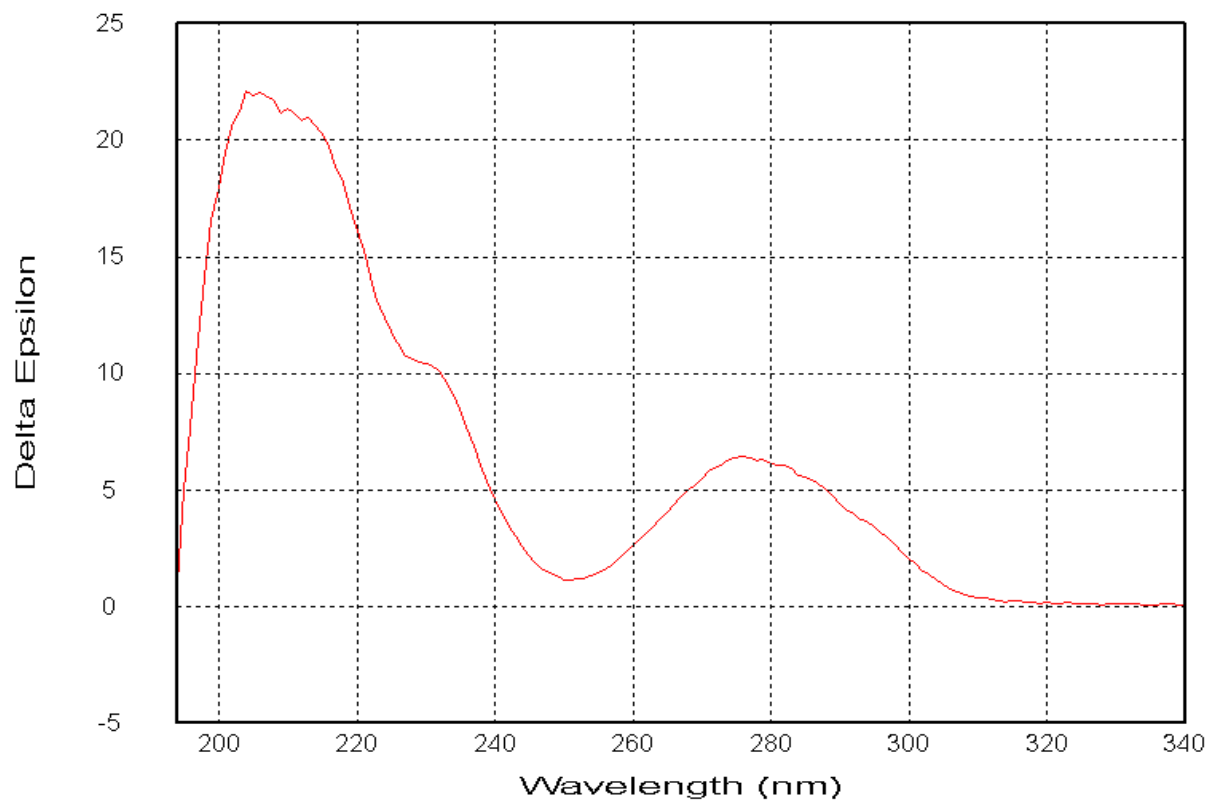

Figure S1. CD spectrum of **1**

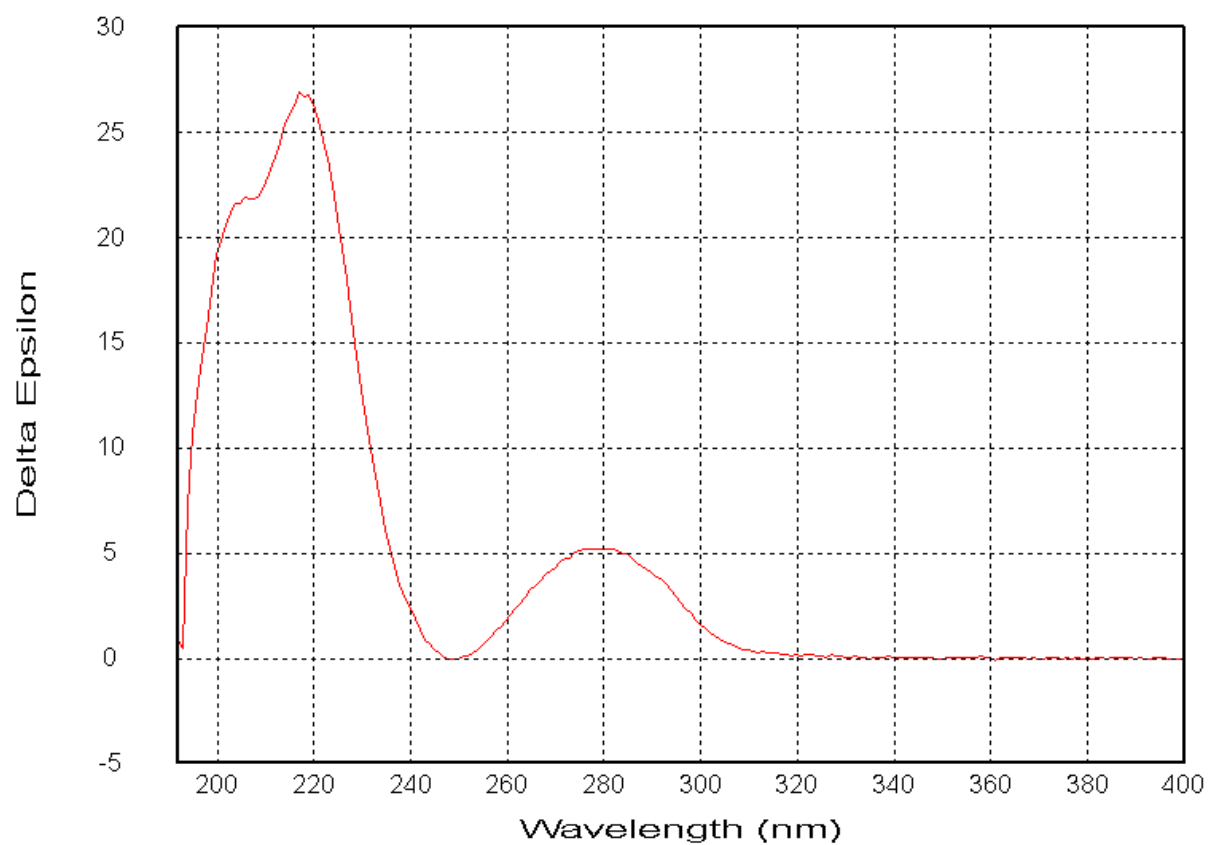

Figure S2. CD spectrum of **2**

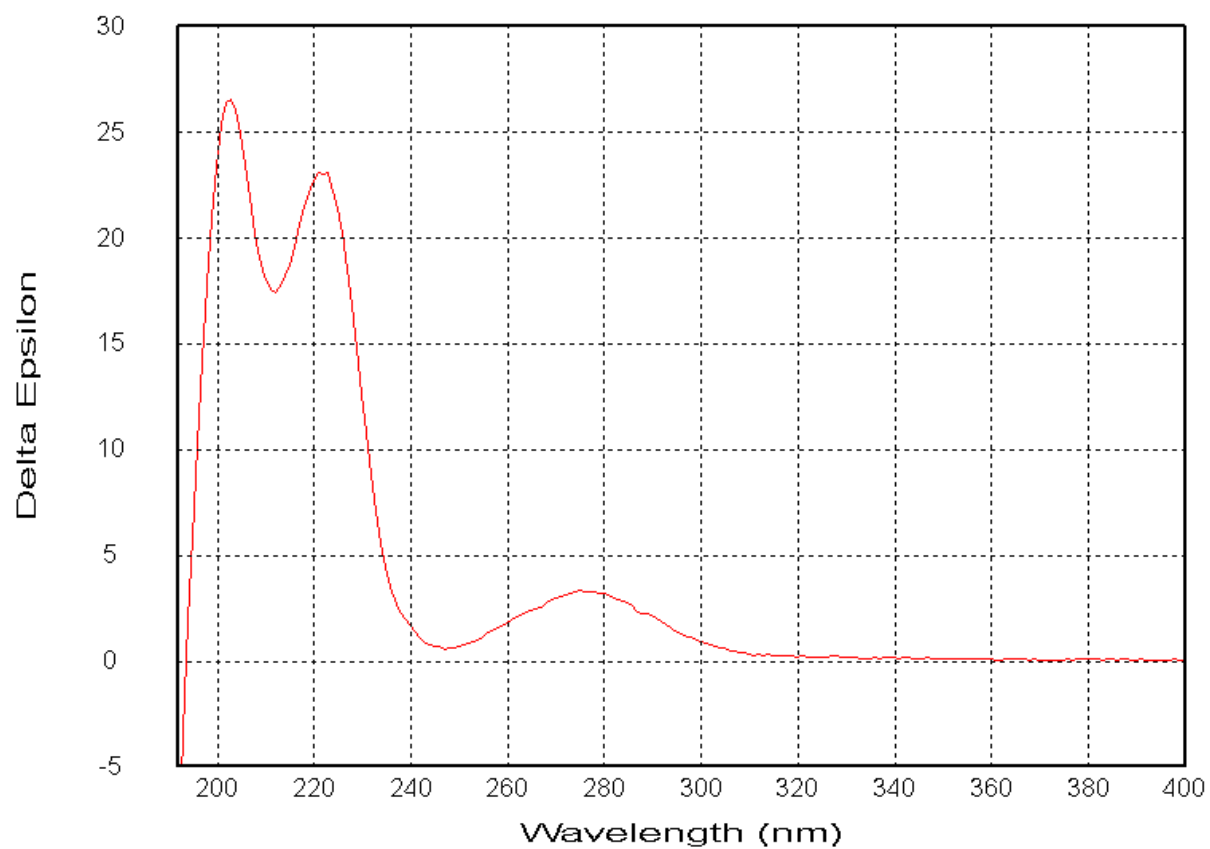

Figure S3.

CD spectrum of 3

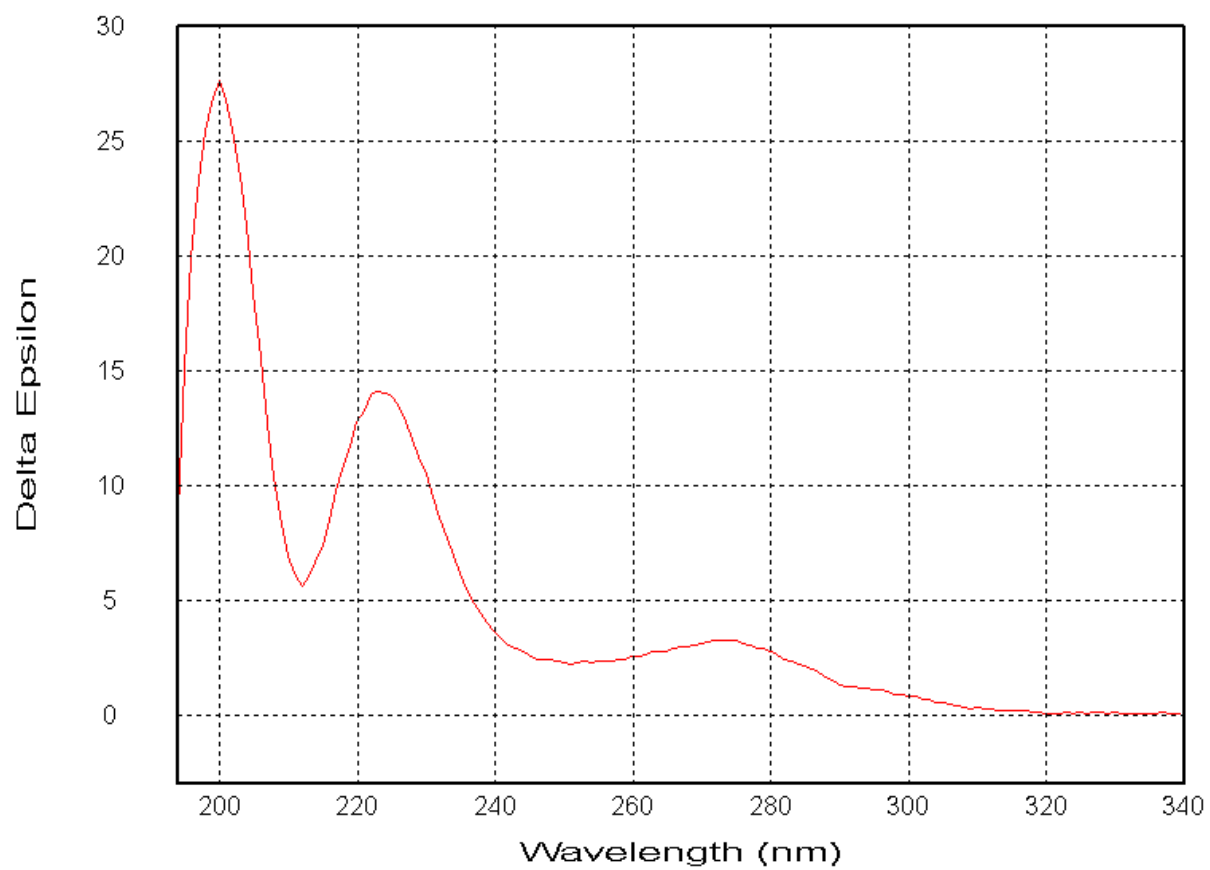

Figure S4. CD spectrum of **4**

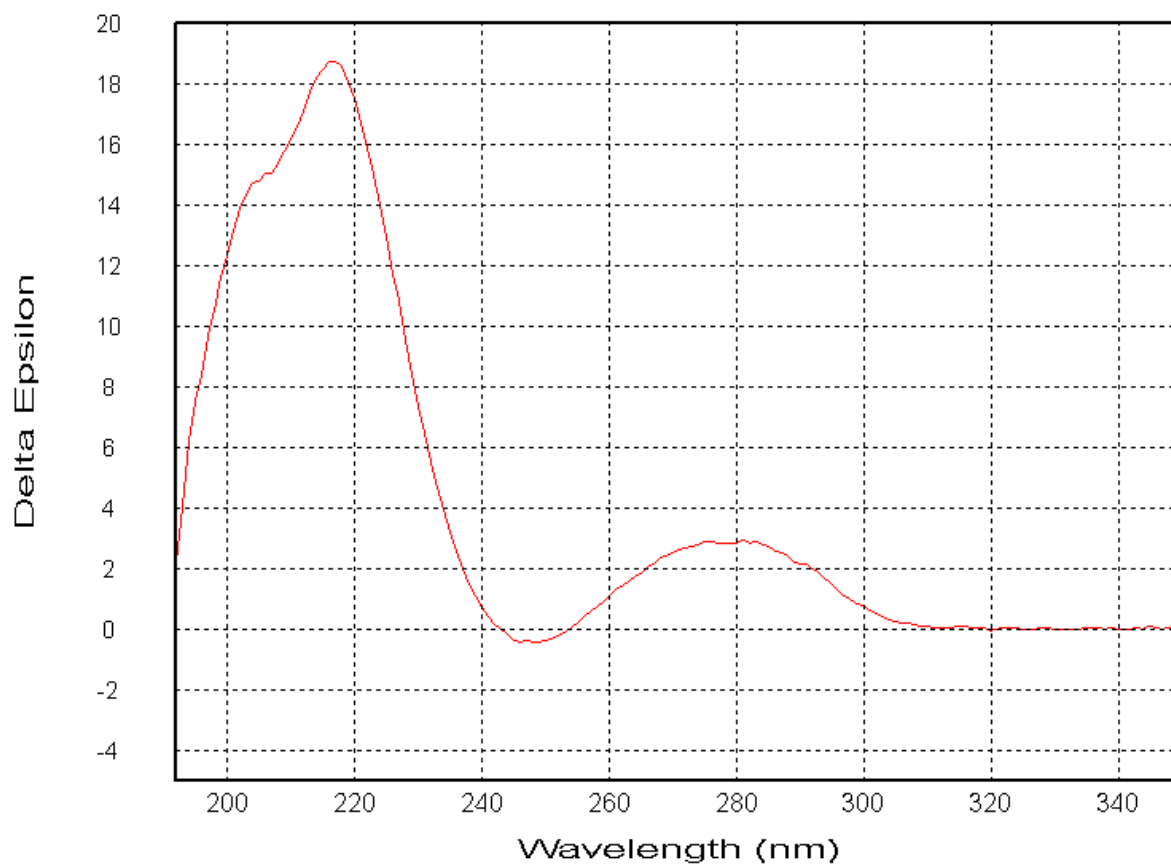

Figure S5. CD spectrum of **5**

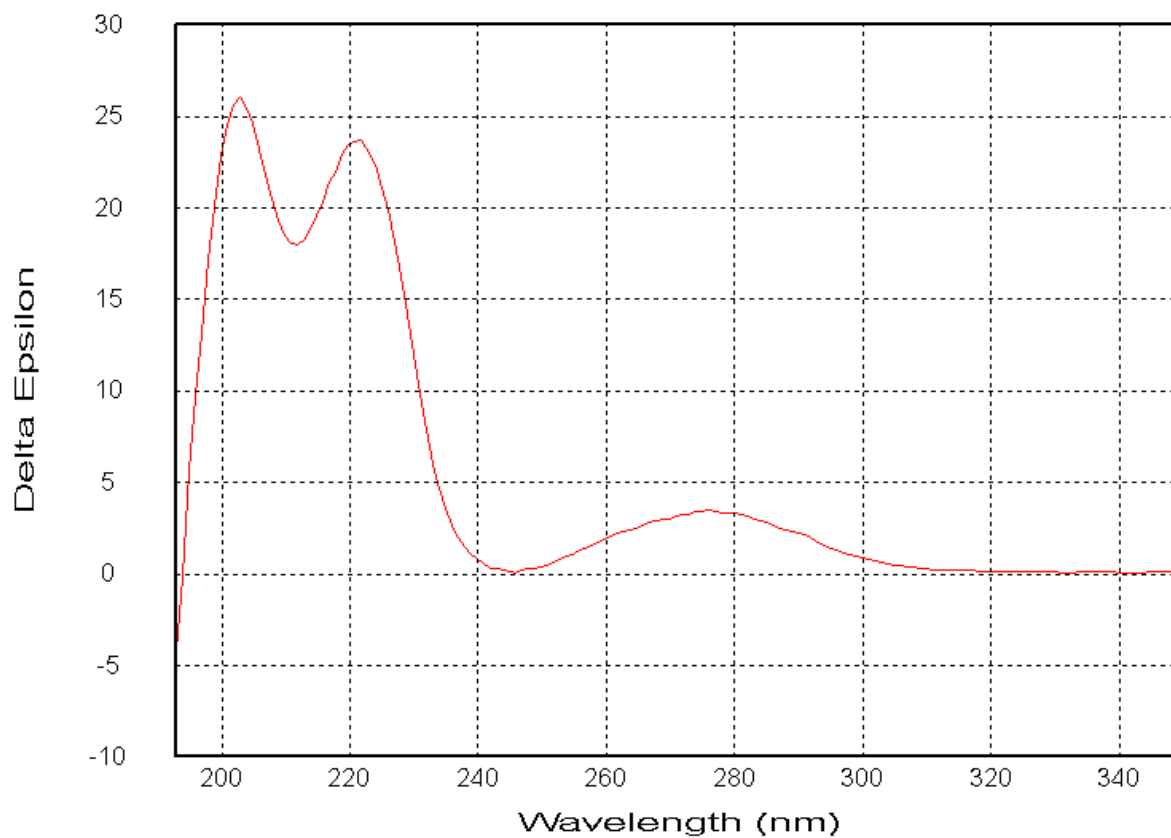

Figure S6. CD spectrum of 6

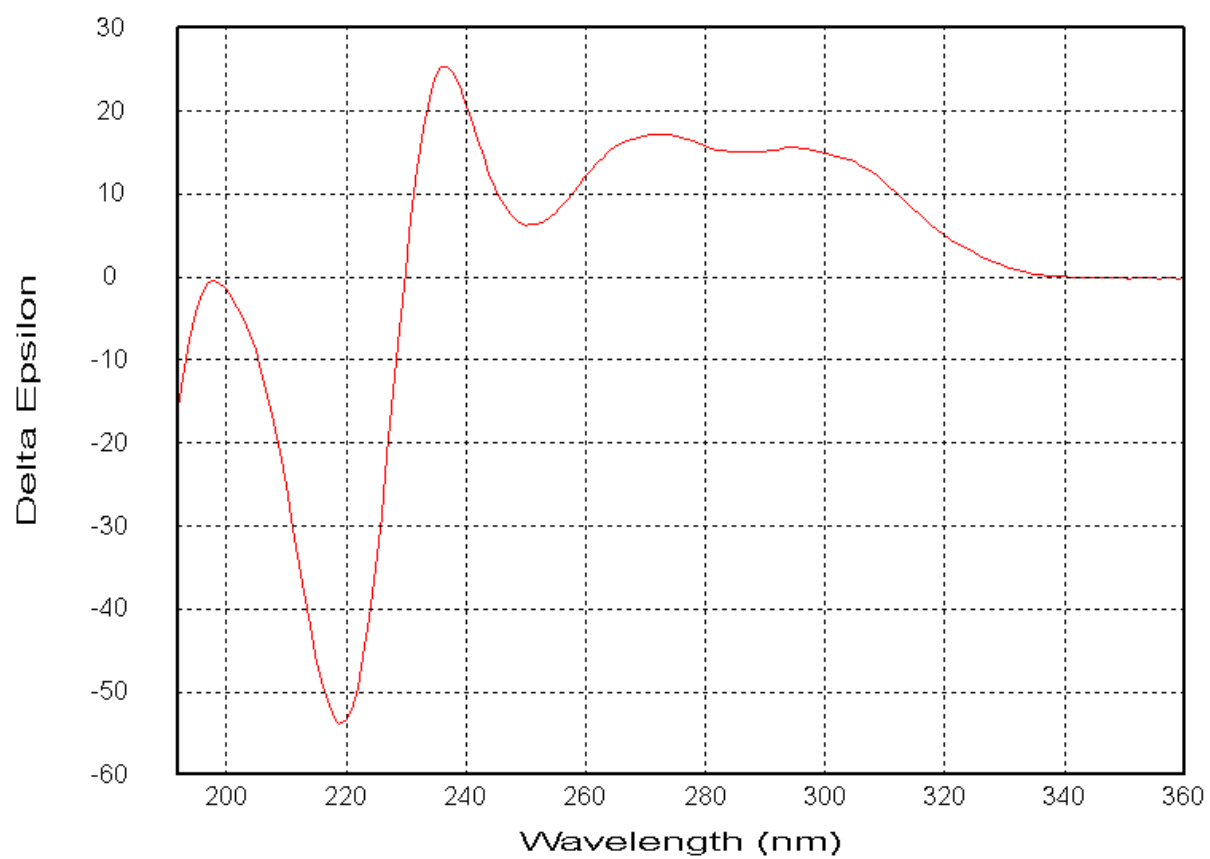

Figure S7.

CD spectrum of 7

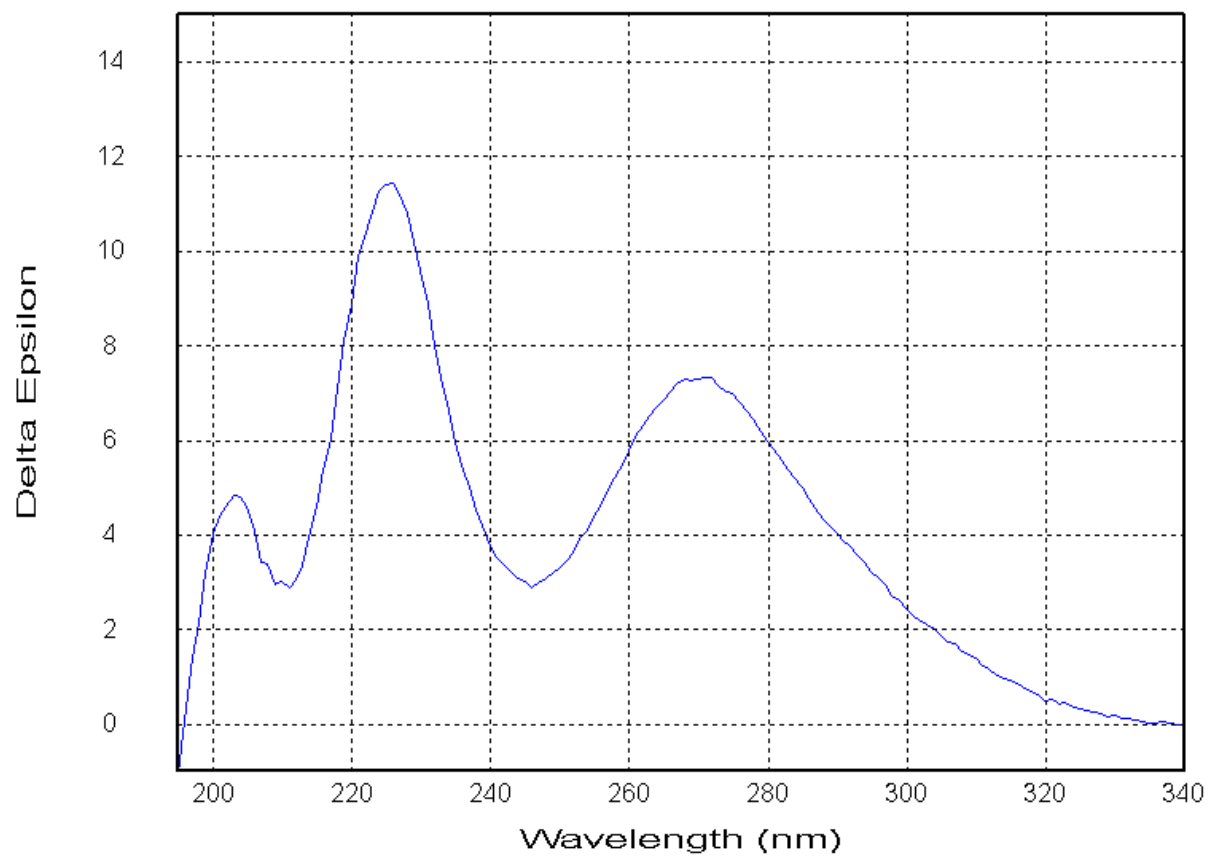

Figure S8.

CD spectrum of 8

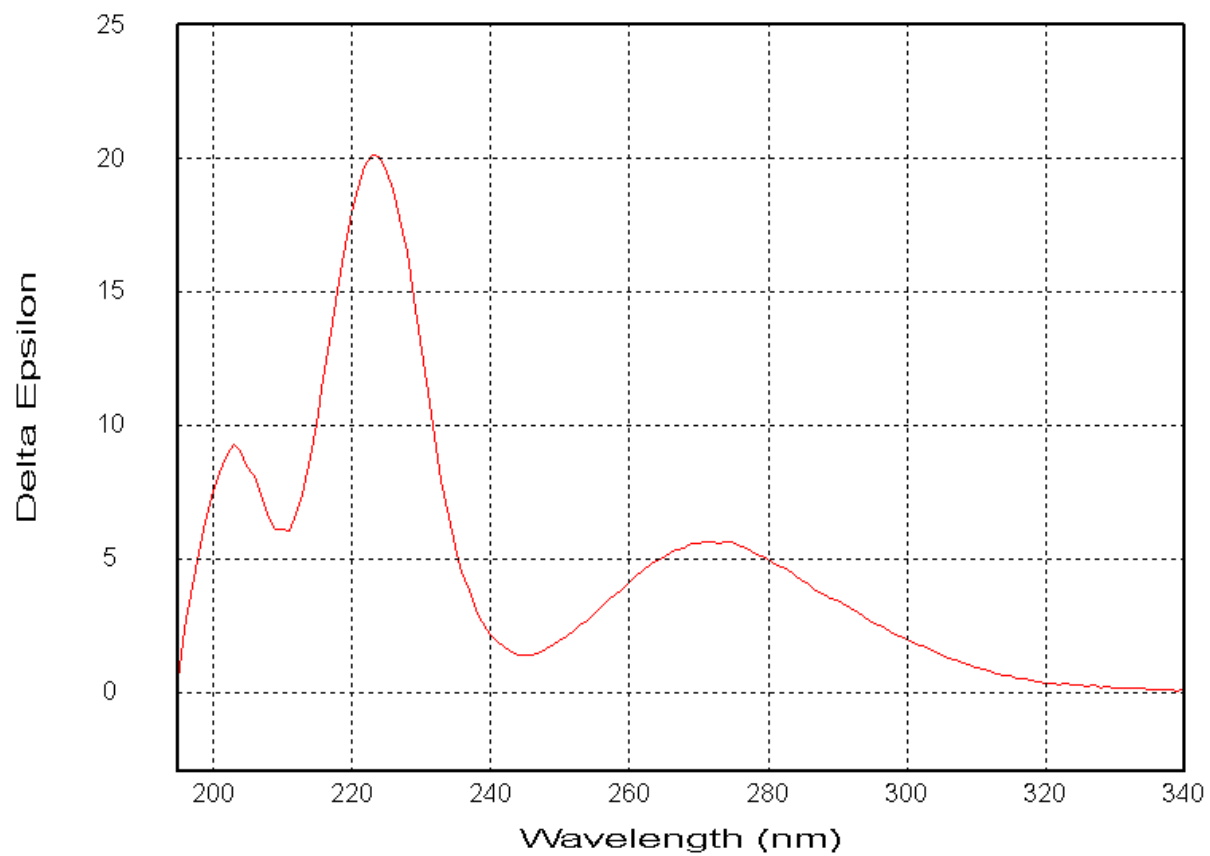

Figure S9.

CD spectrum of **9**

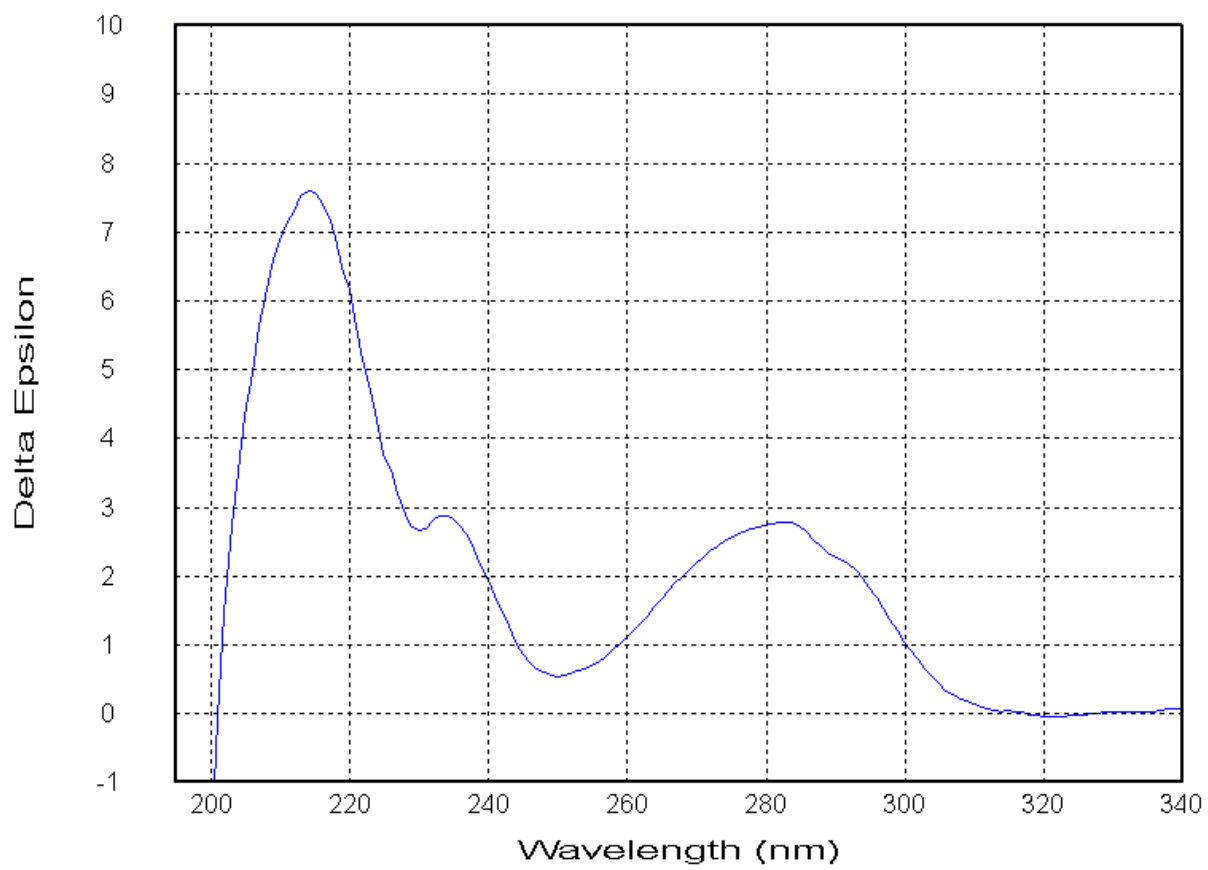

Figure

S10. CD spectrum of **10**



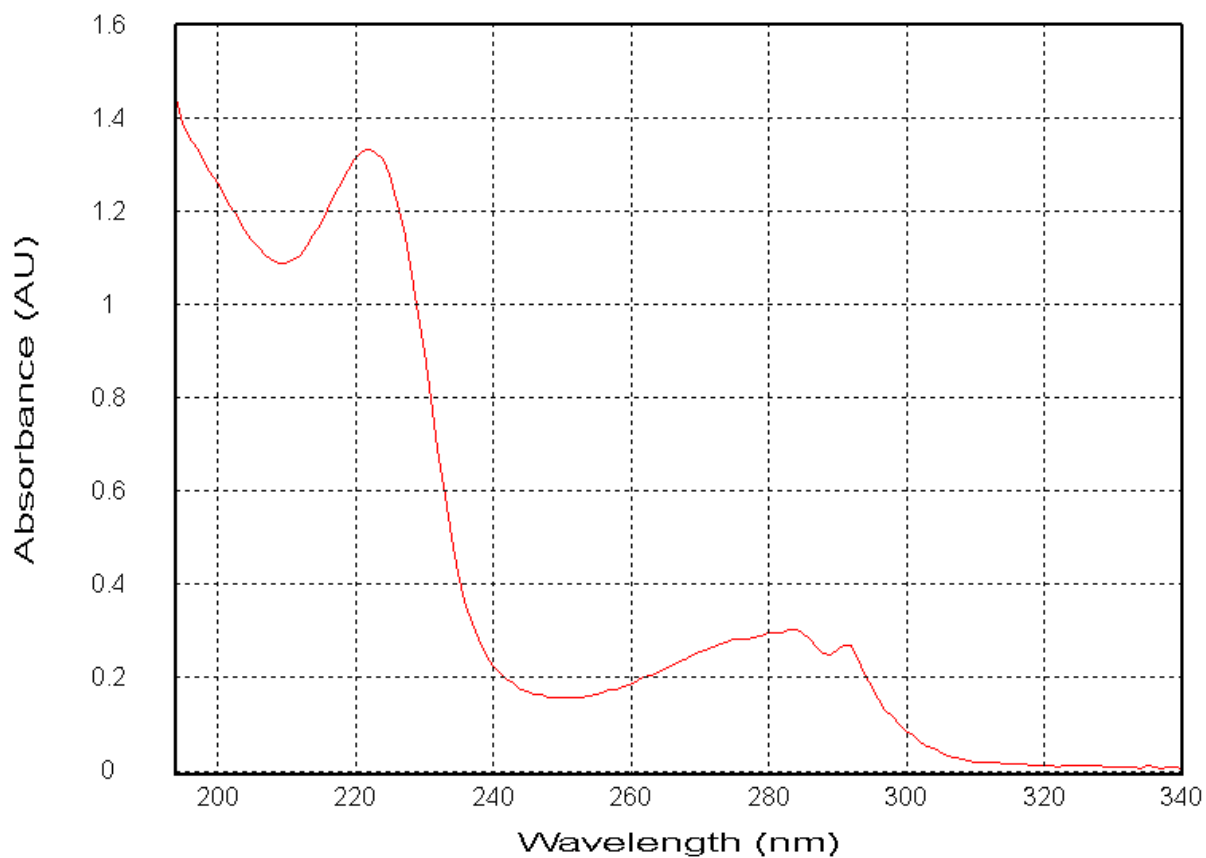

Figure

S11. UV spectrum of 1

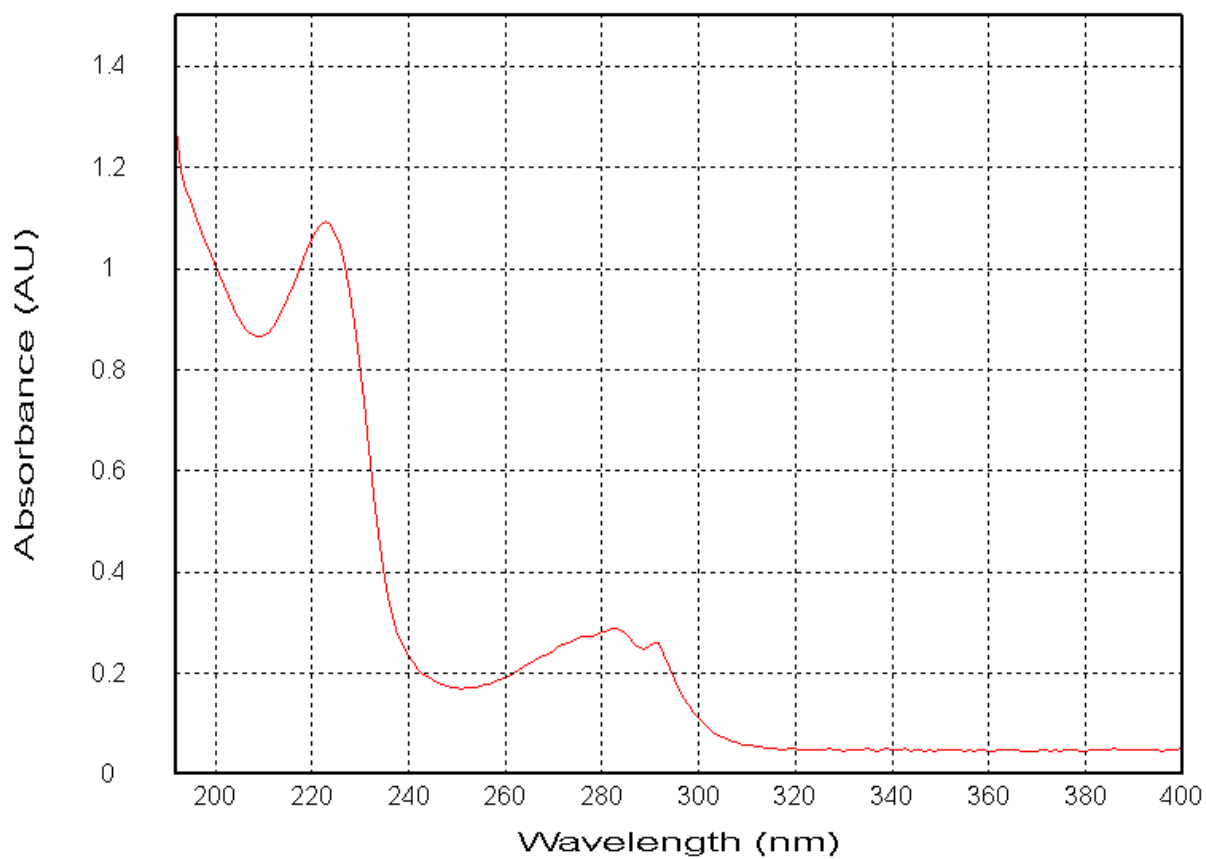

Figure S12. UV spectrum of **2**

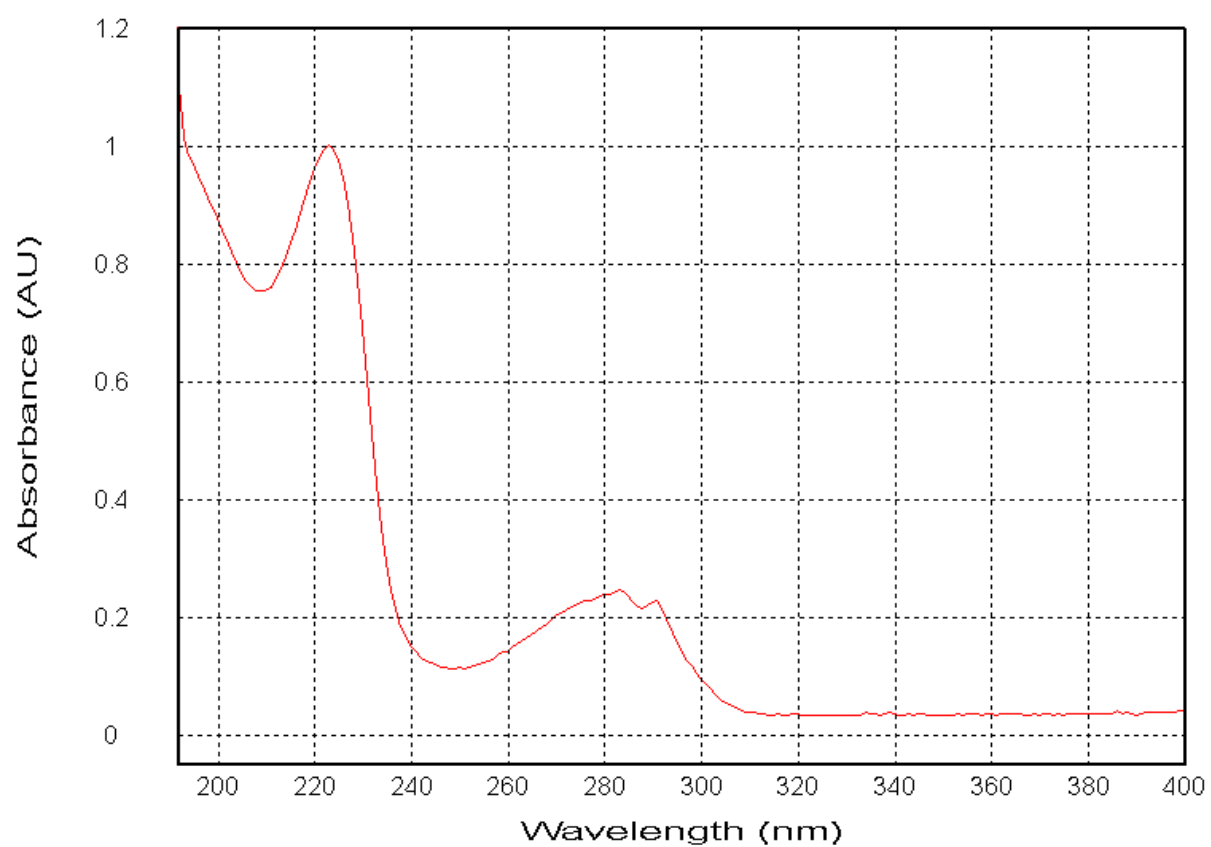

Figure S13. UV spectrum of **3**

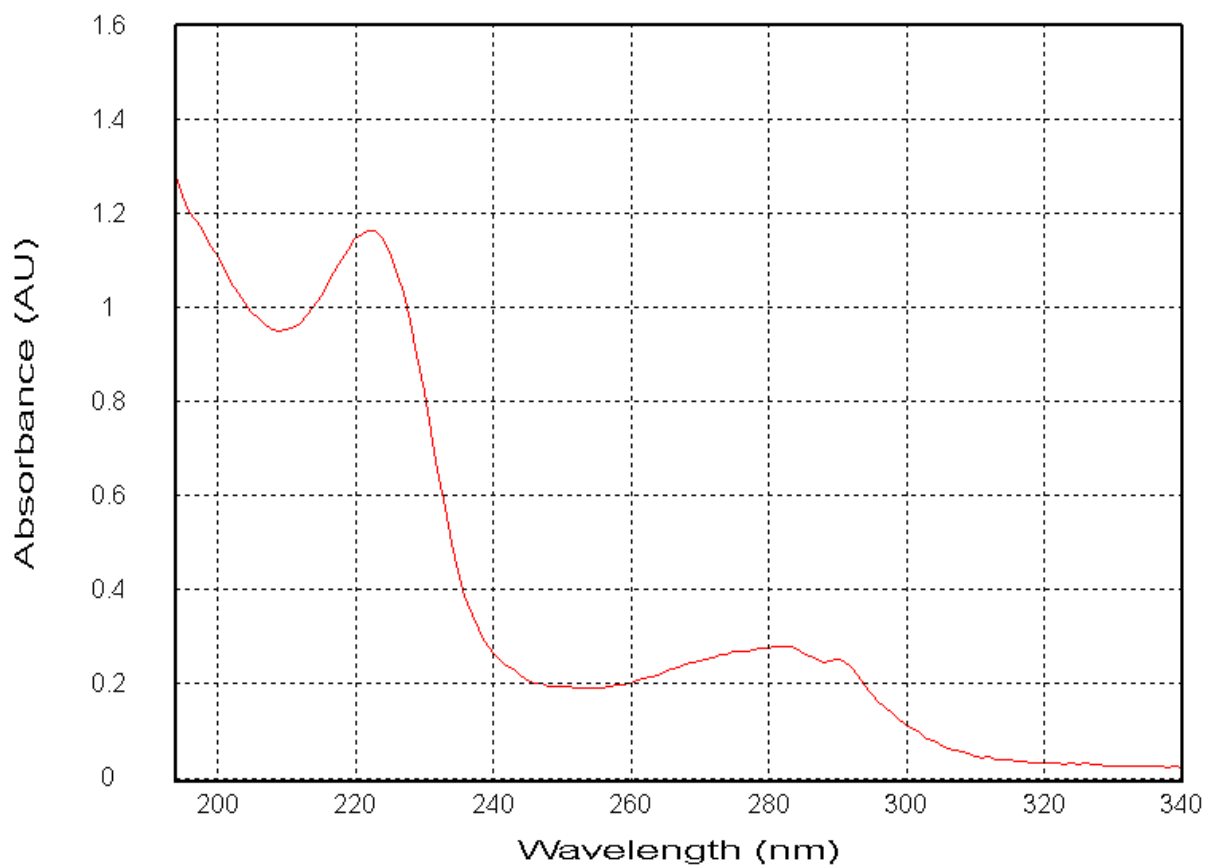

Figure

S14. UV spectrum of **4**

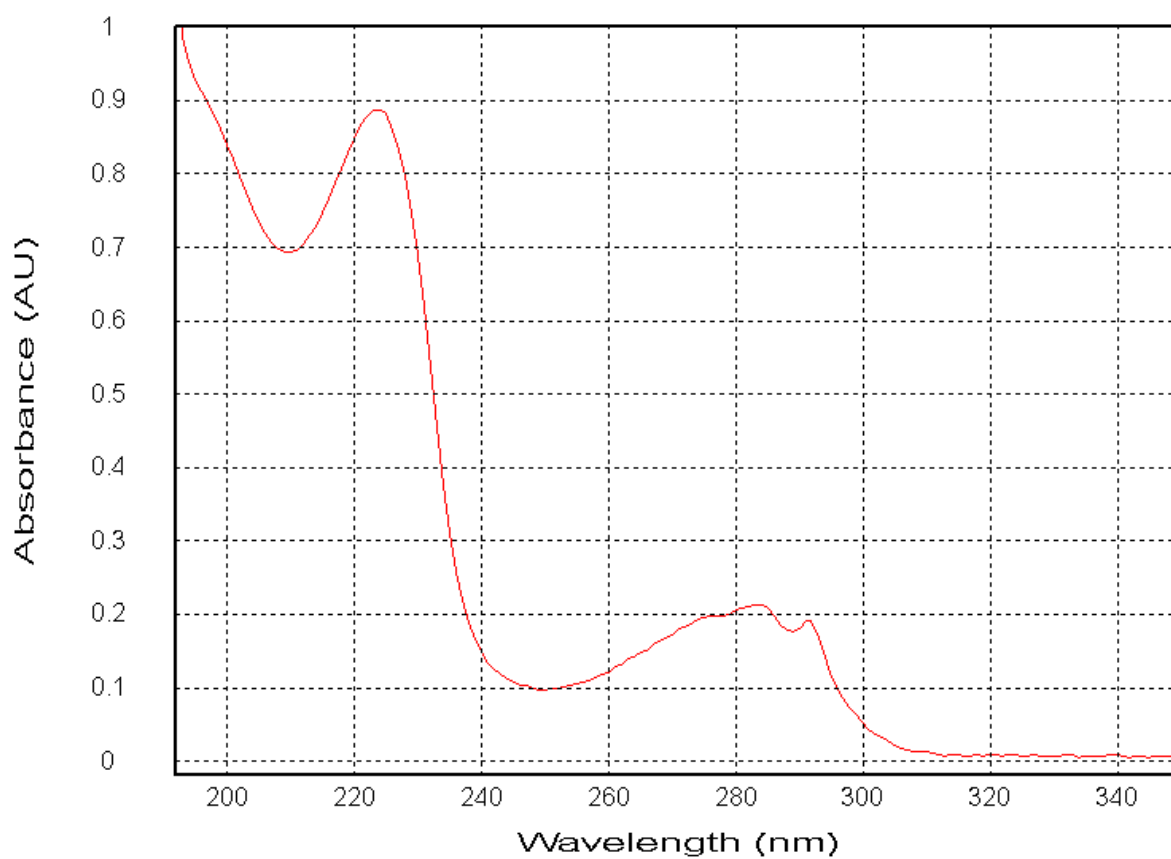

Figure S15. UV spectrum of 5

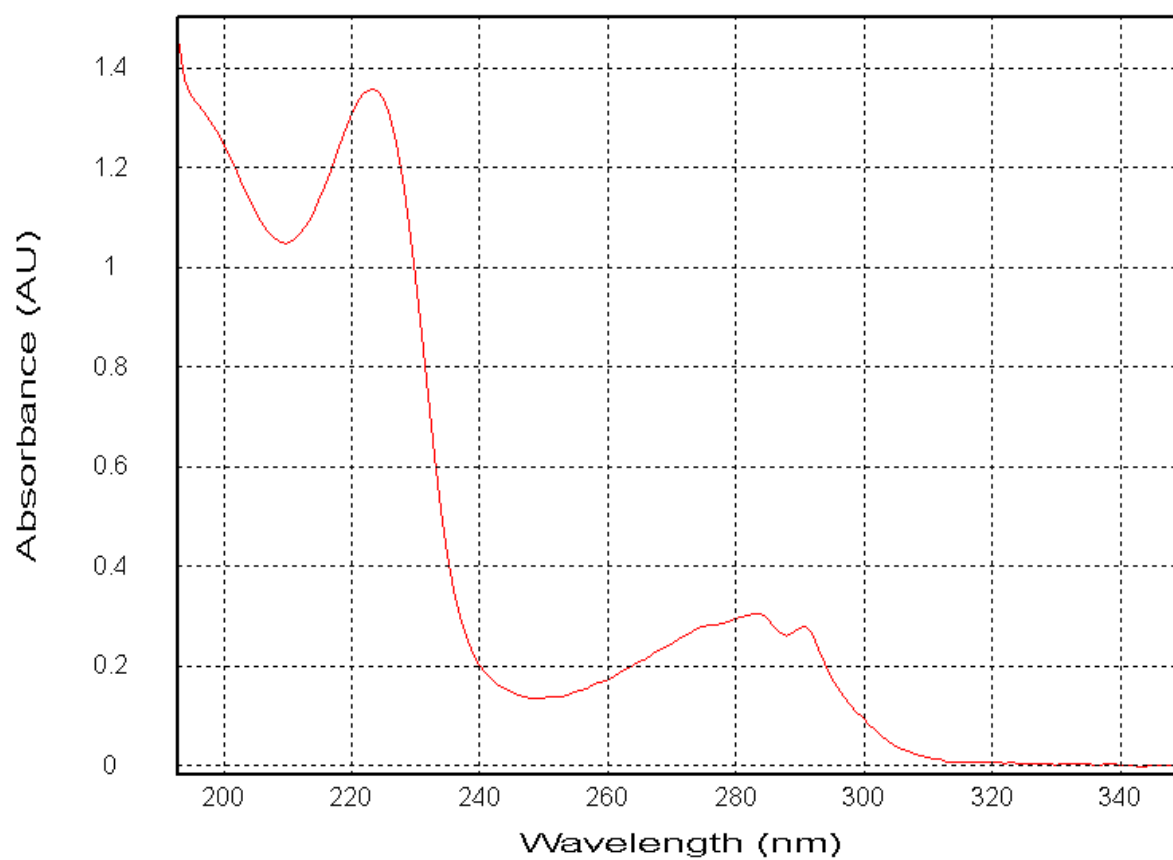

Figure S16. UV spectrum of 6

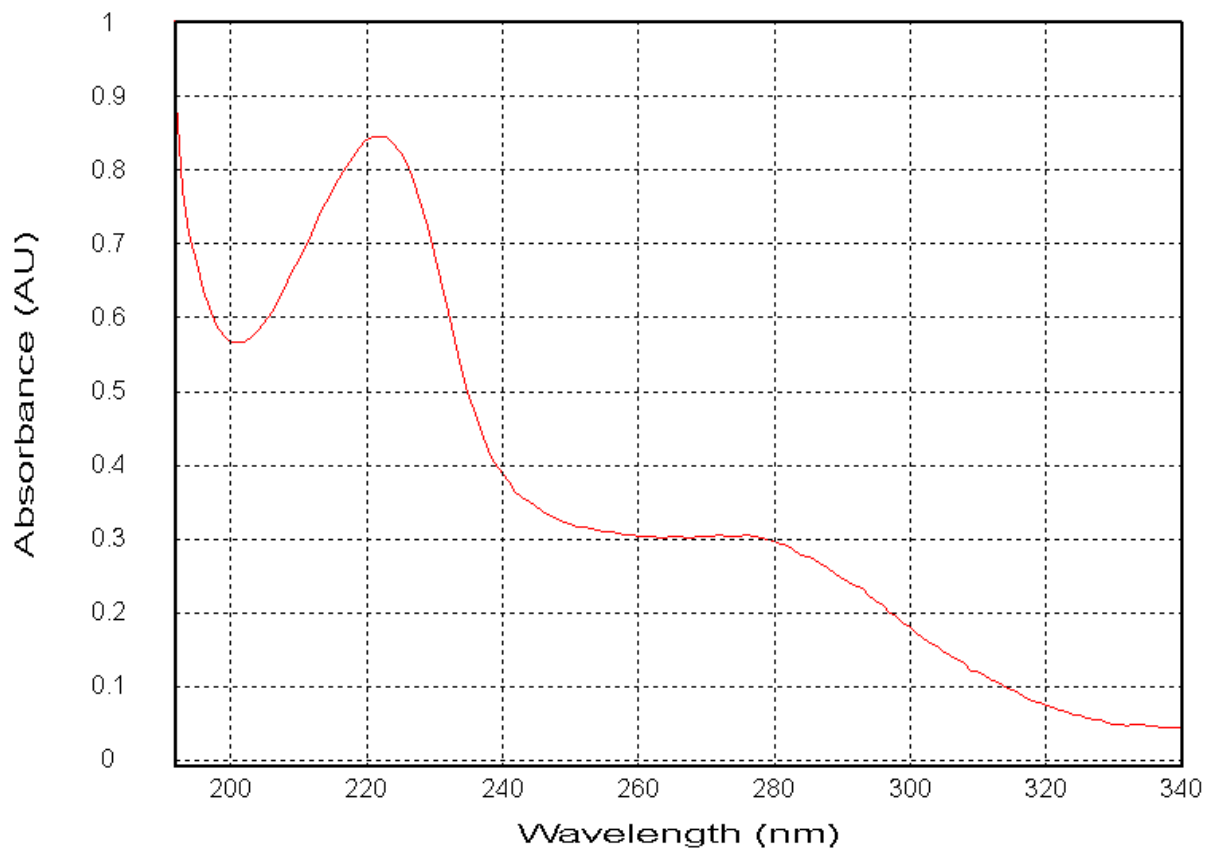

Figure

S17. UV spectrum of 7

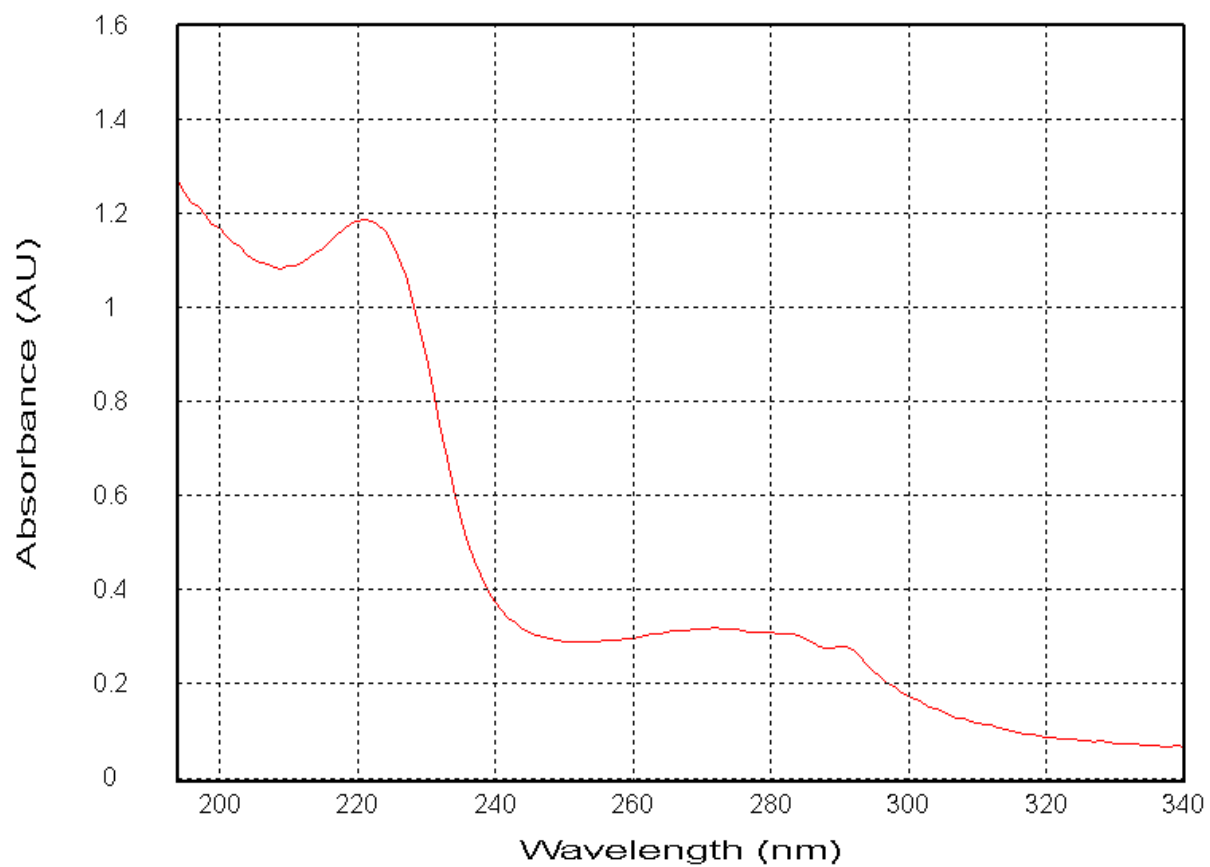

S18. UV spectrum of 8

Figure

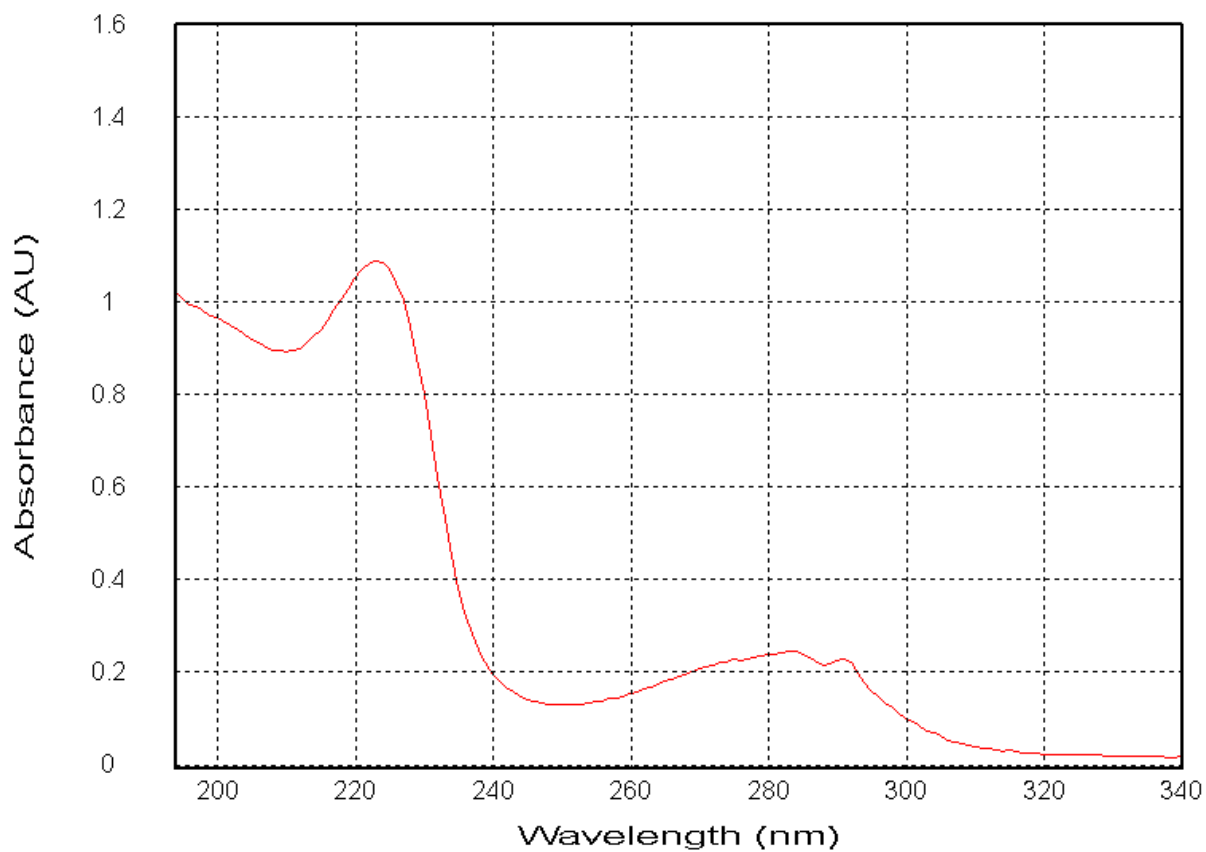

Figure

S19. UV spectrum of **9**

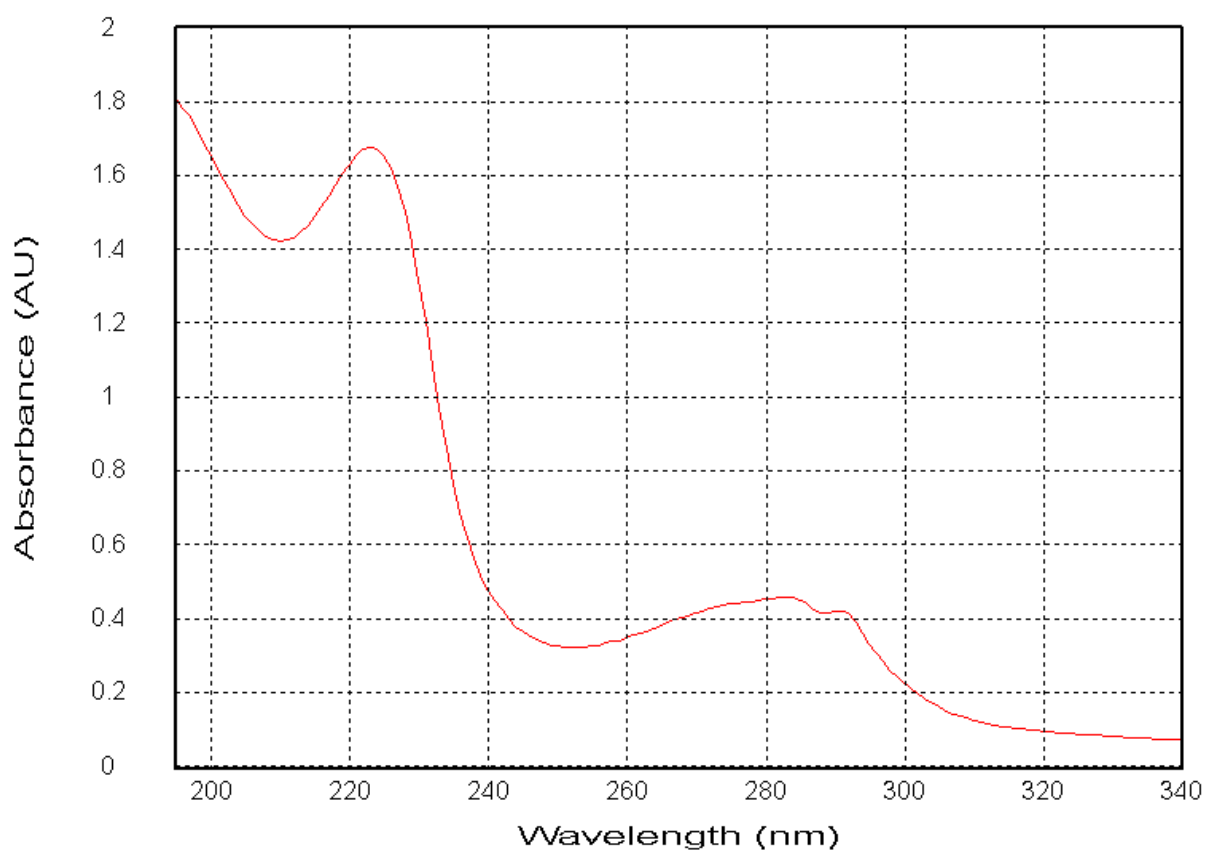

Figure

S20. UV spectrum of **10**

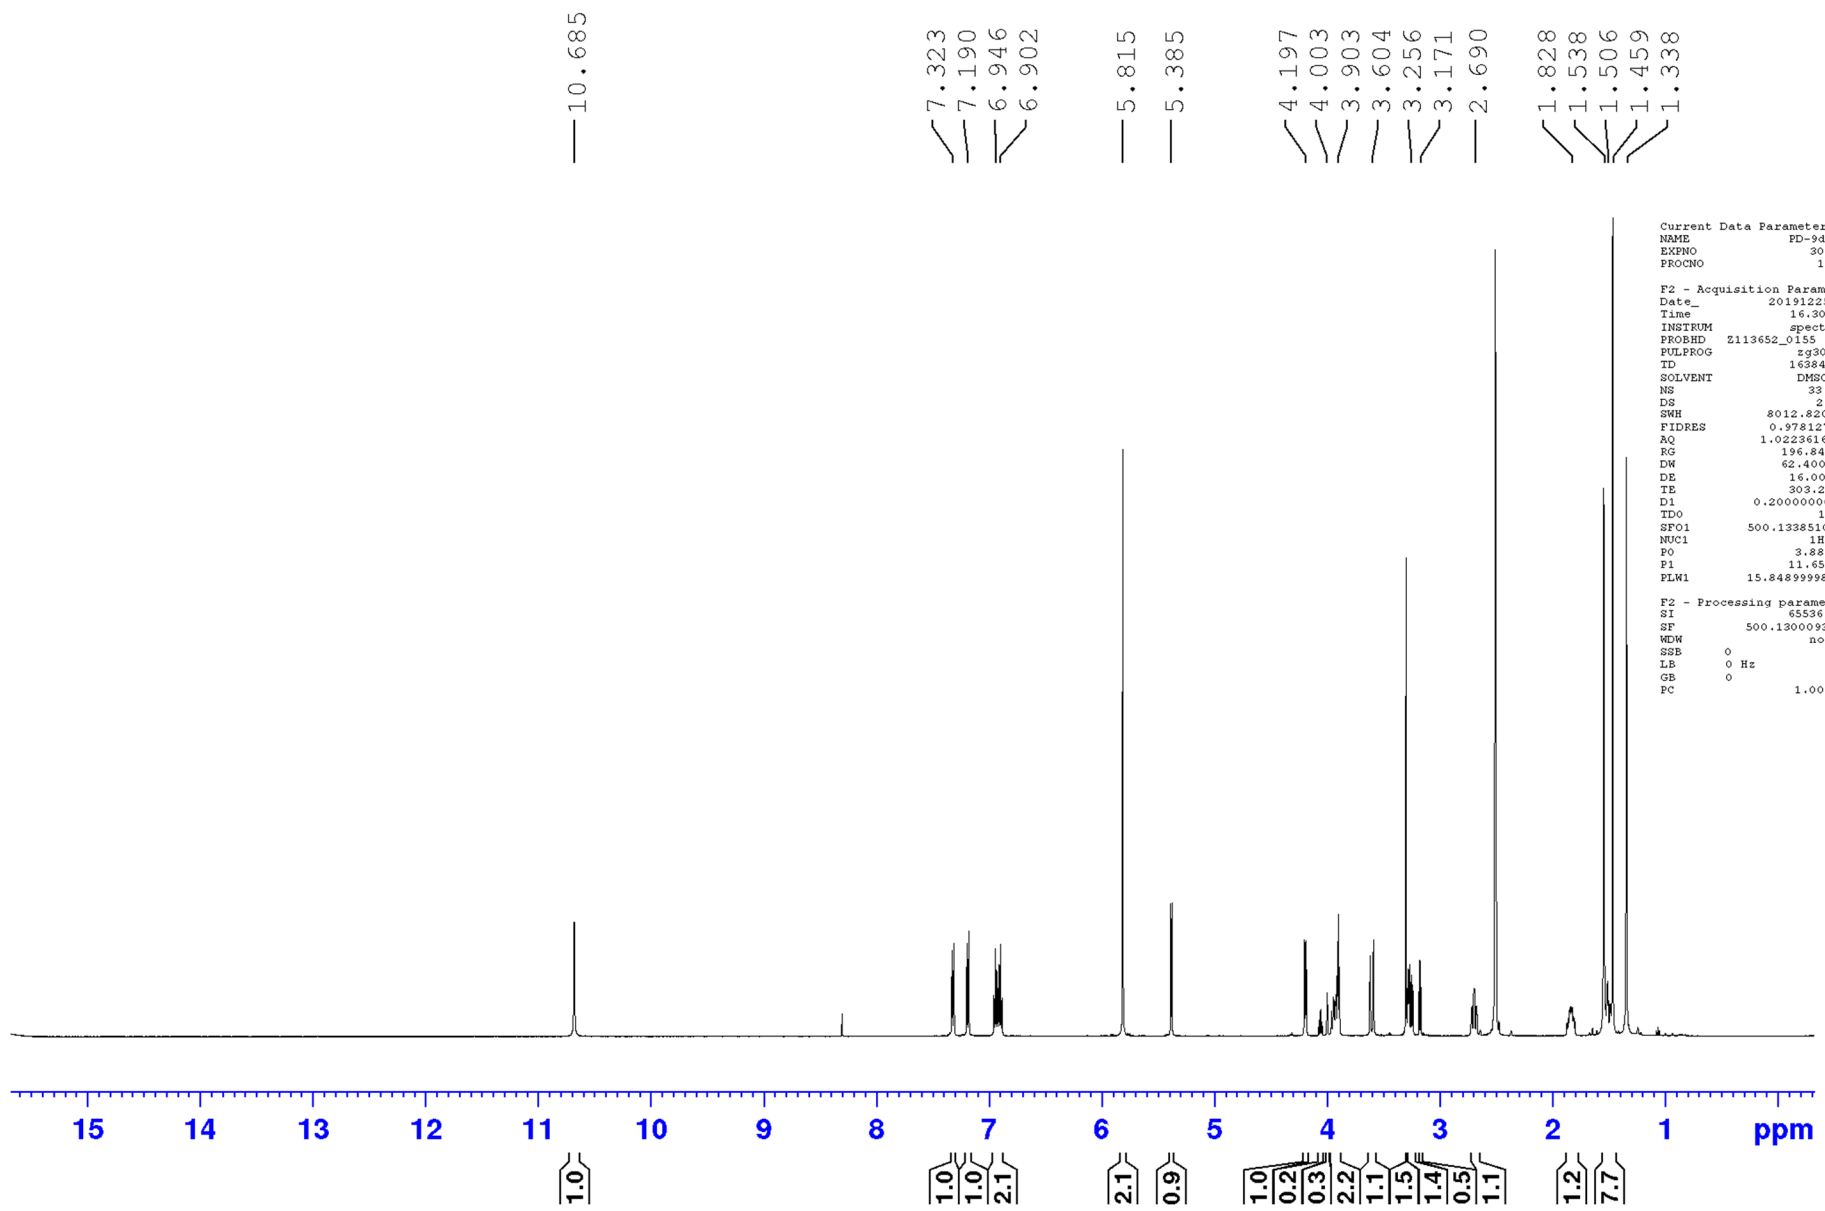

Figure S21. <sup>1</sup>H NMR spectrum (500 MHz, DMSO-d<sub>6</sub>) of **1**



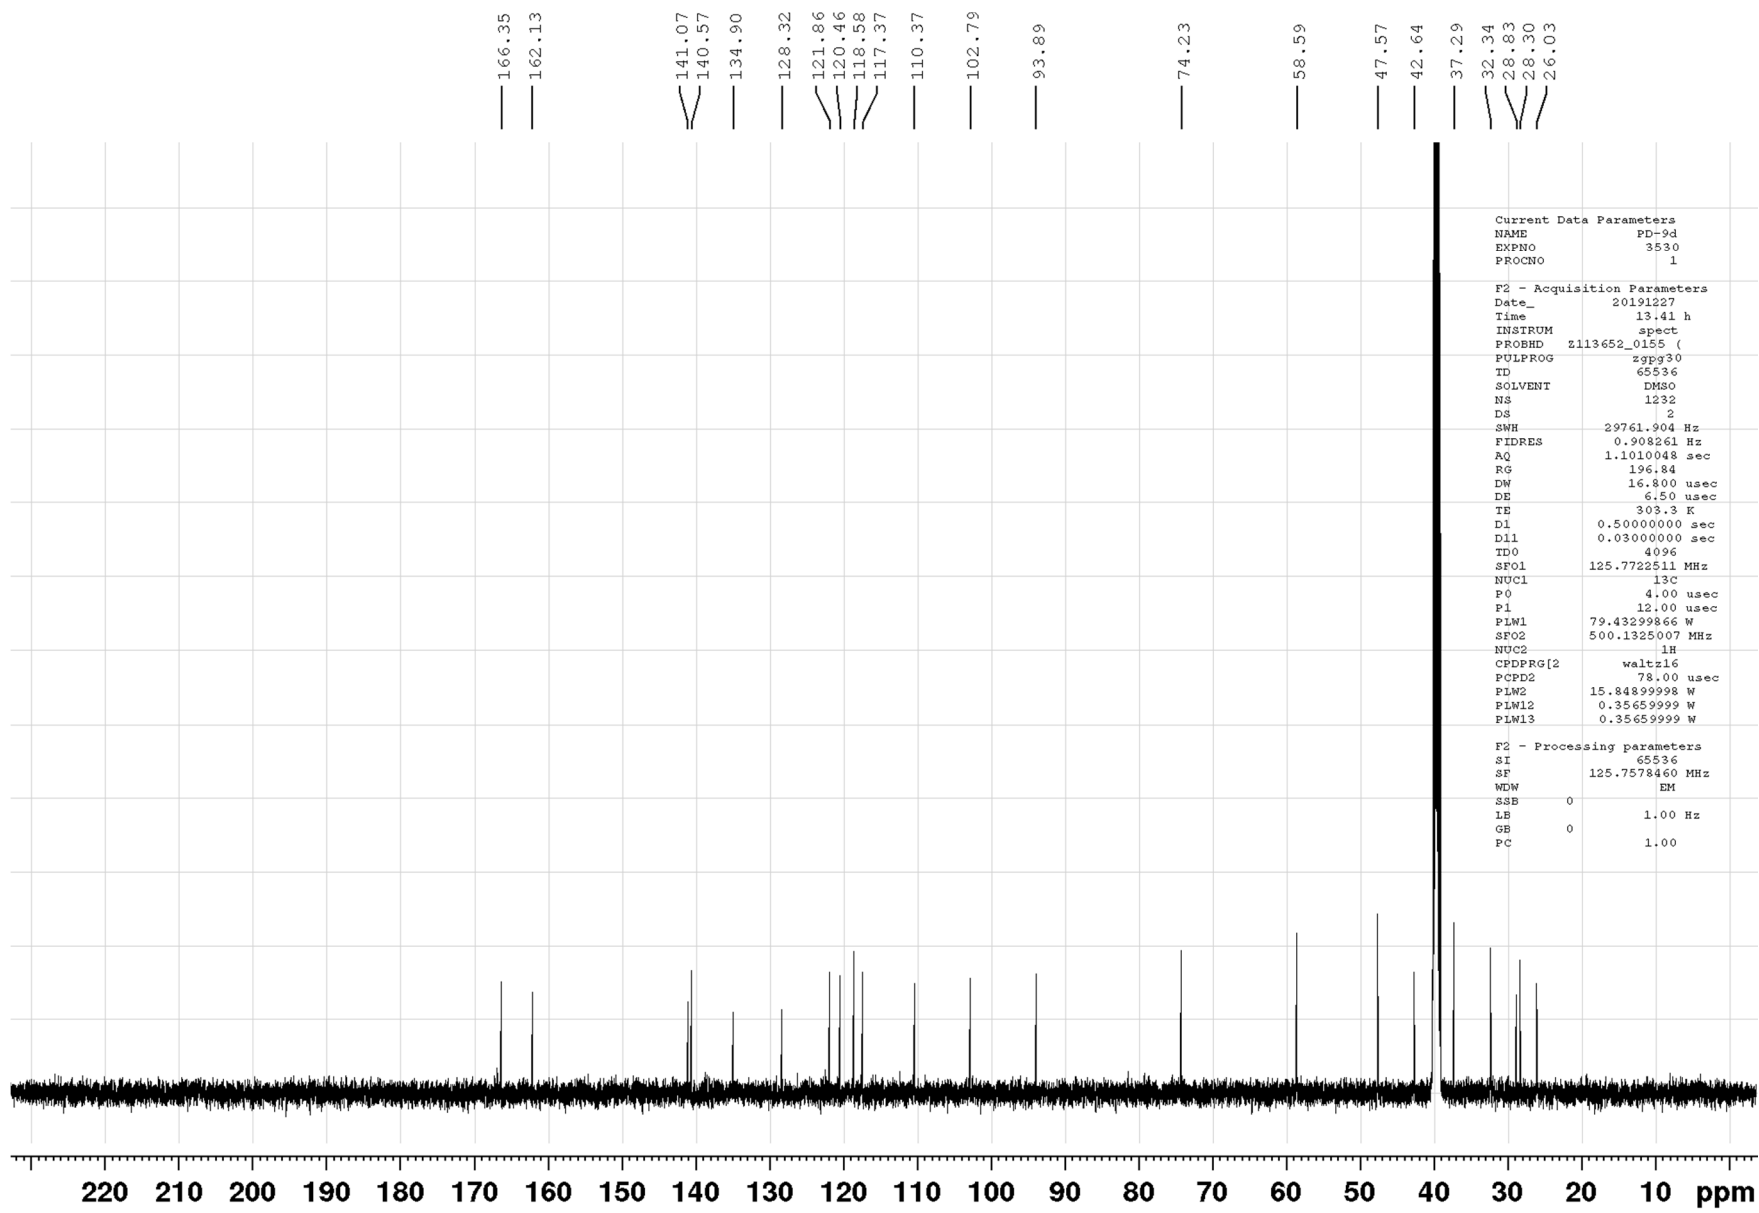

Figure S22. <sup>13</sup>C NMR spectrum (125 MHz, DMSO-d<sub>6</sub>) of **1**

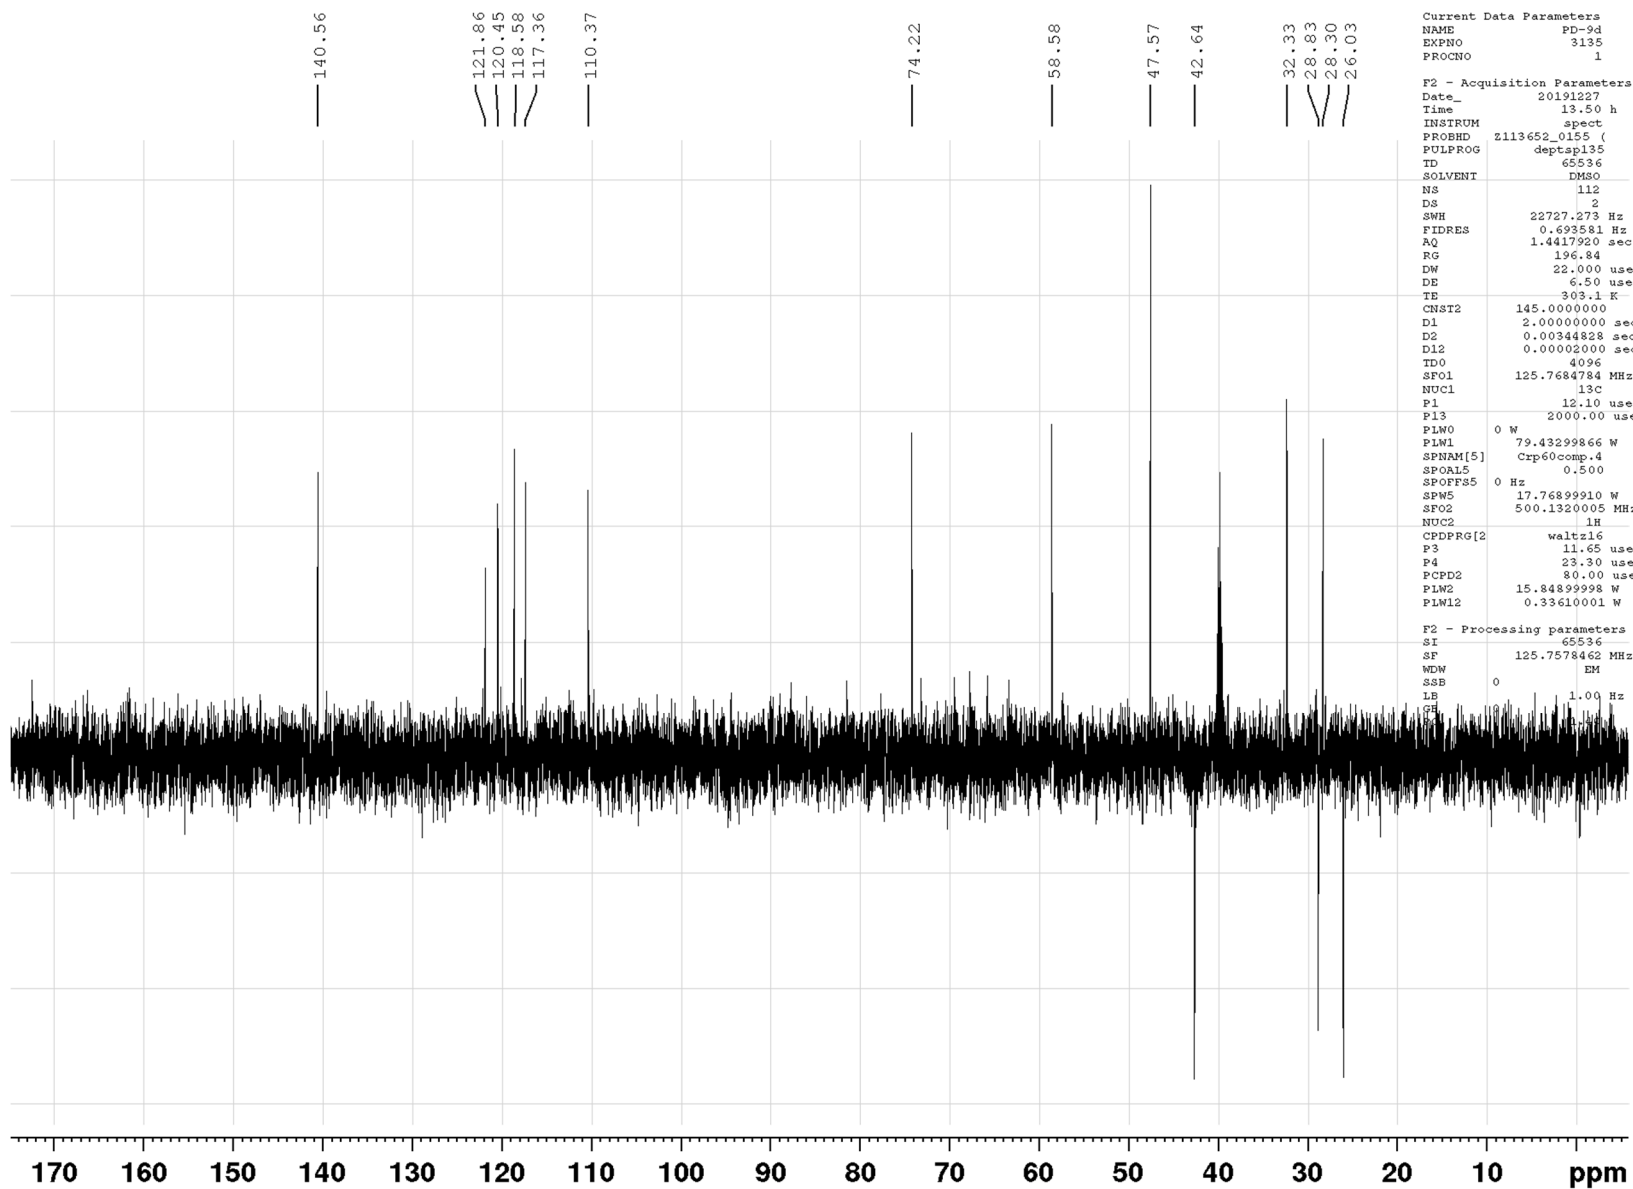

Figure S23. DEPT-135 NMR spectrum (125 MHz, DMSO-d6) of **1**

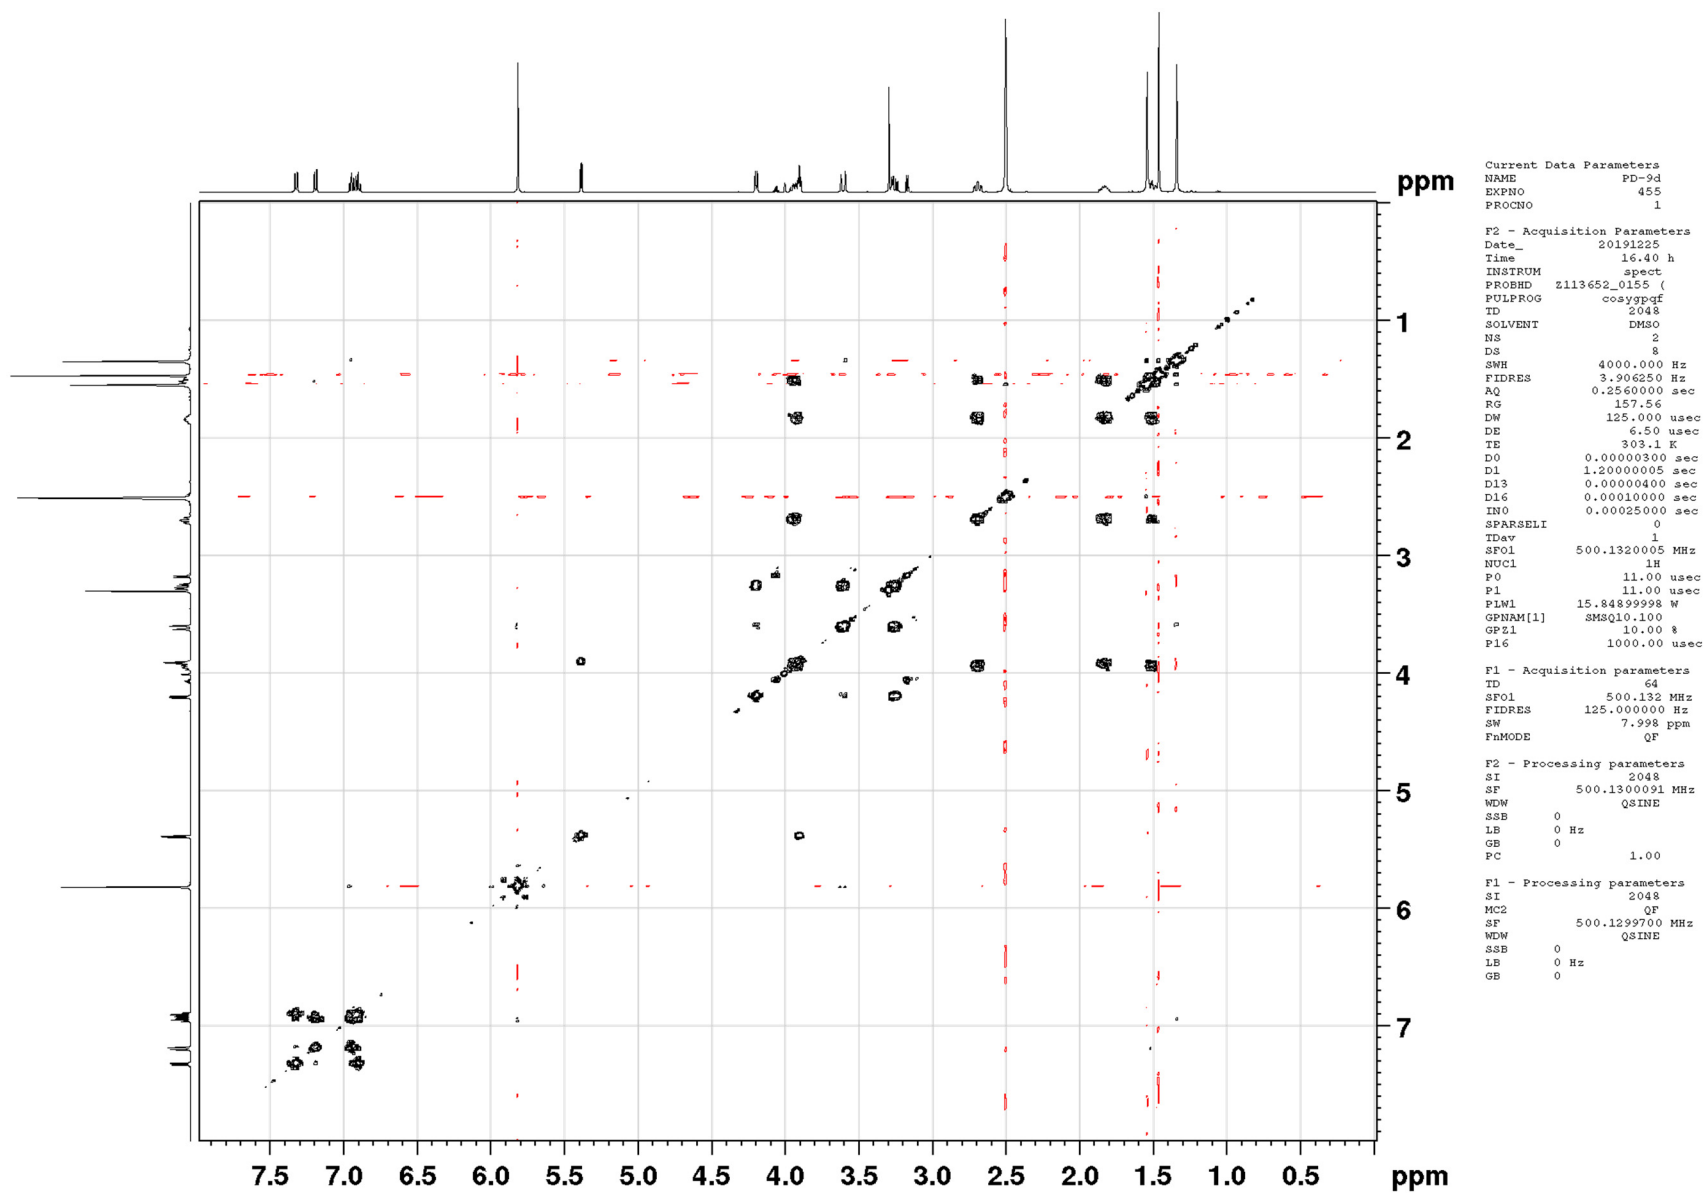

Figure S24. COSY-45 spectrum (500 MHz, DMSO-d6) of 1



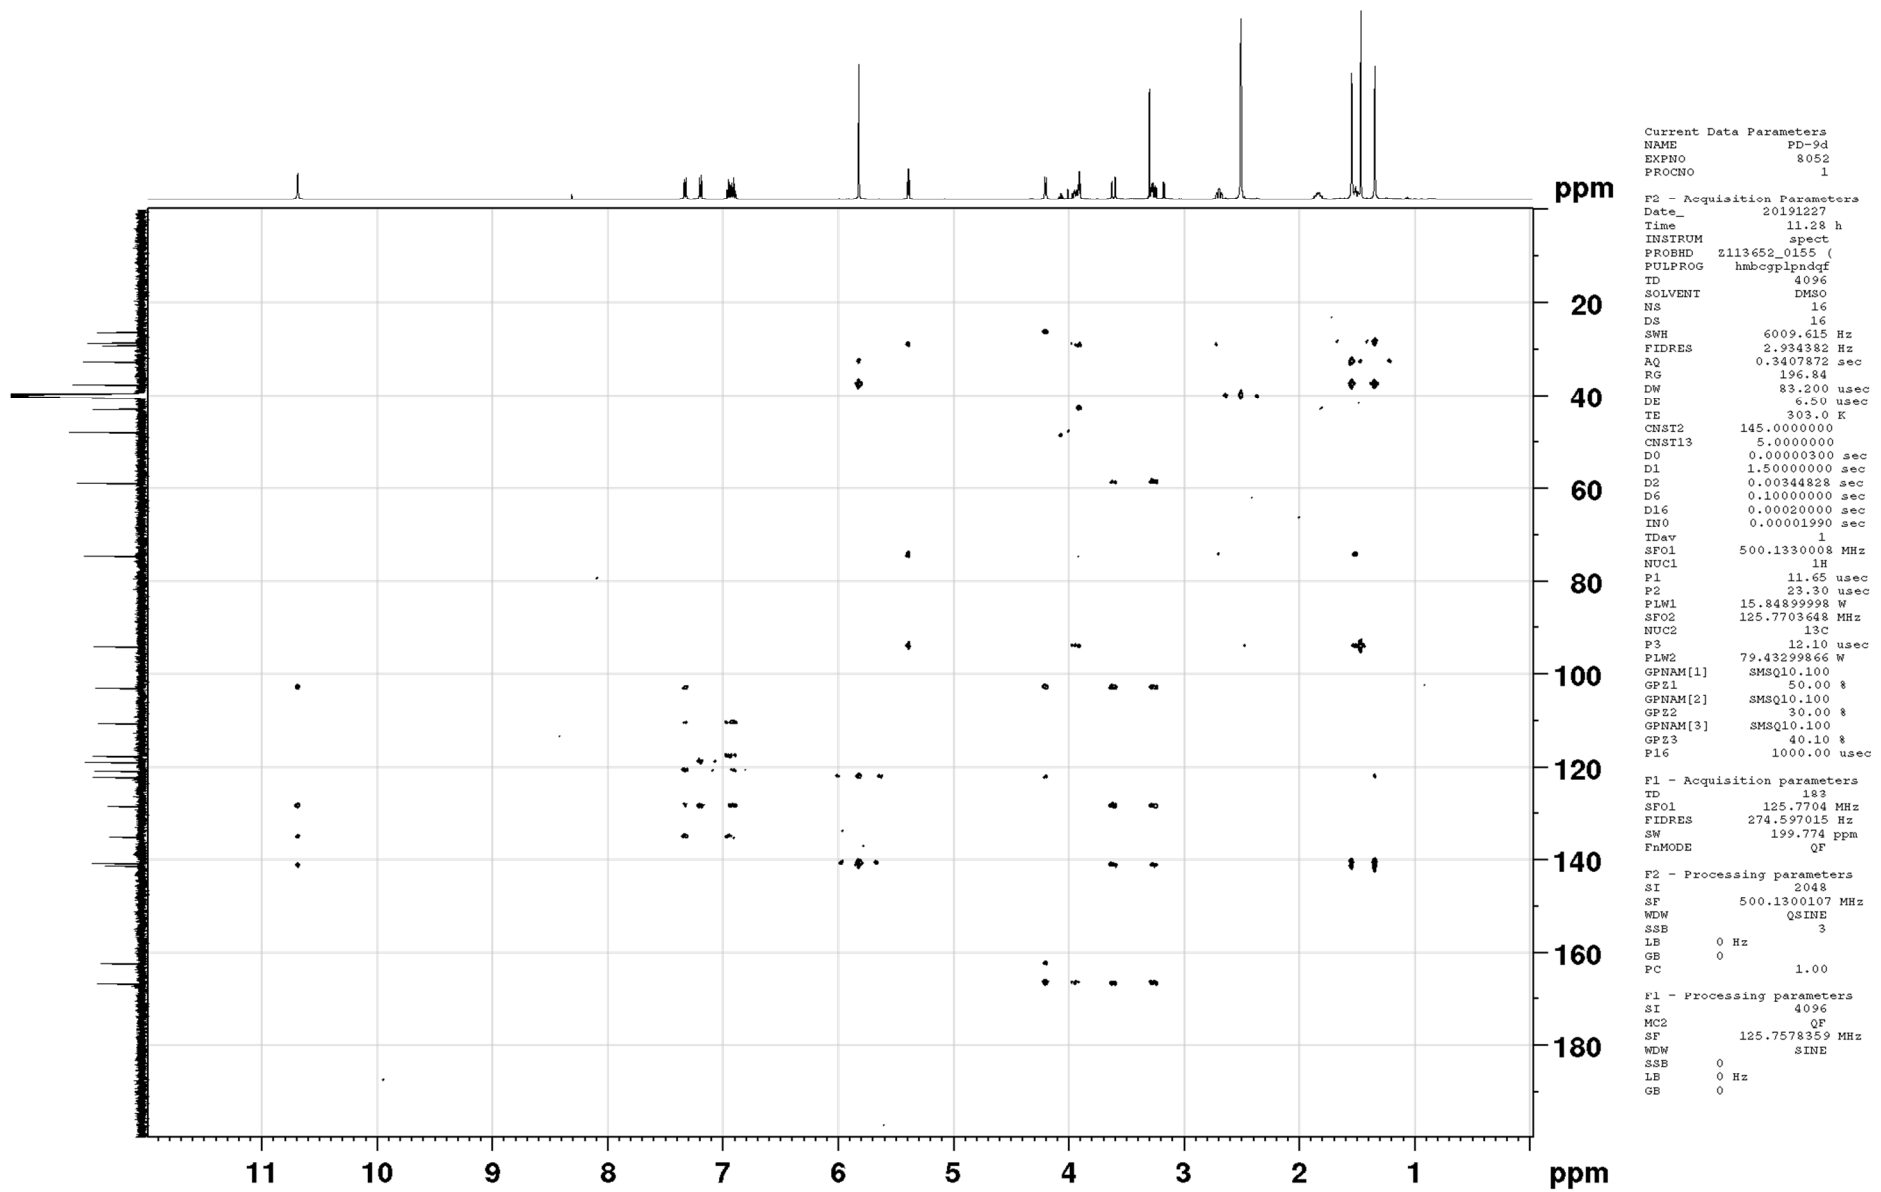

Figure S26. HMBC spectrum (500 MHz, DMSO-d6) of 1

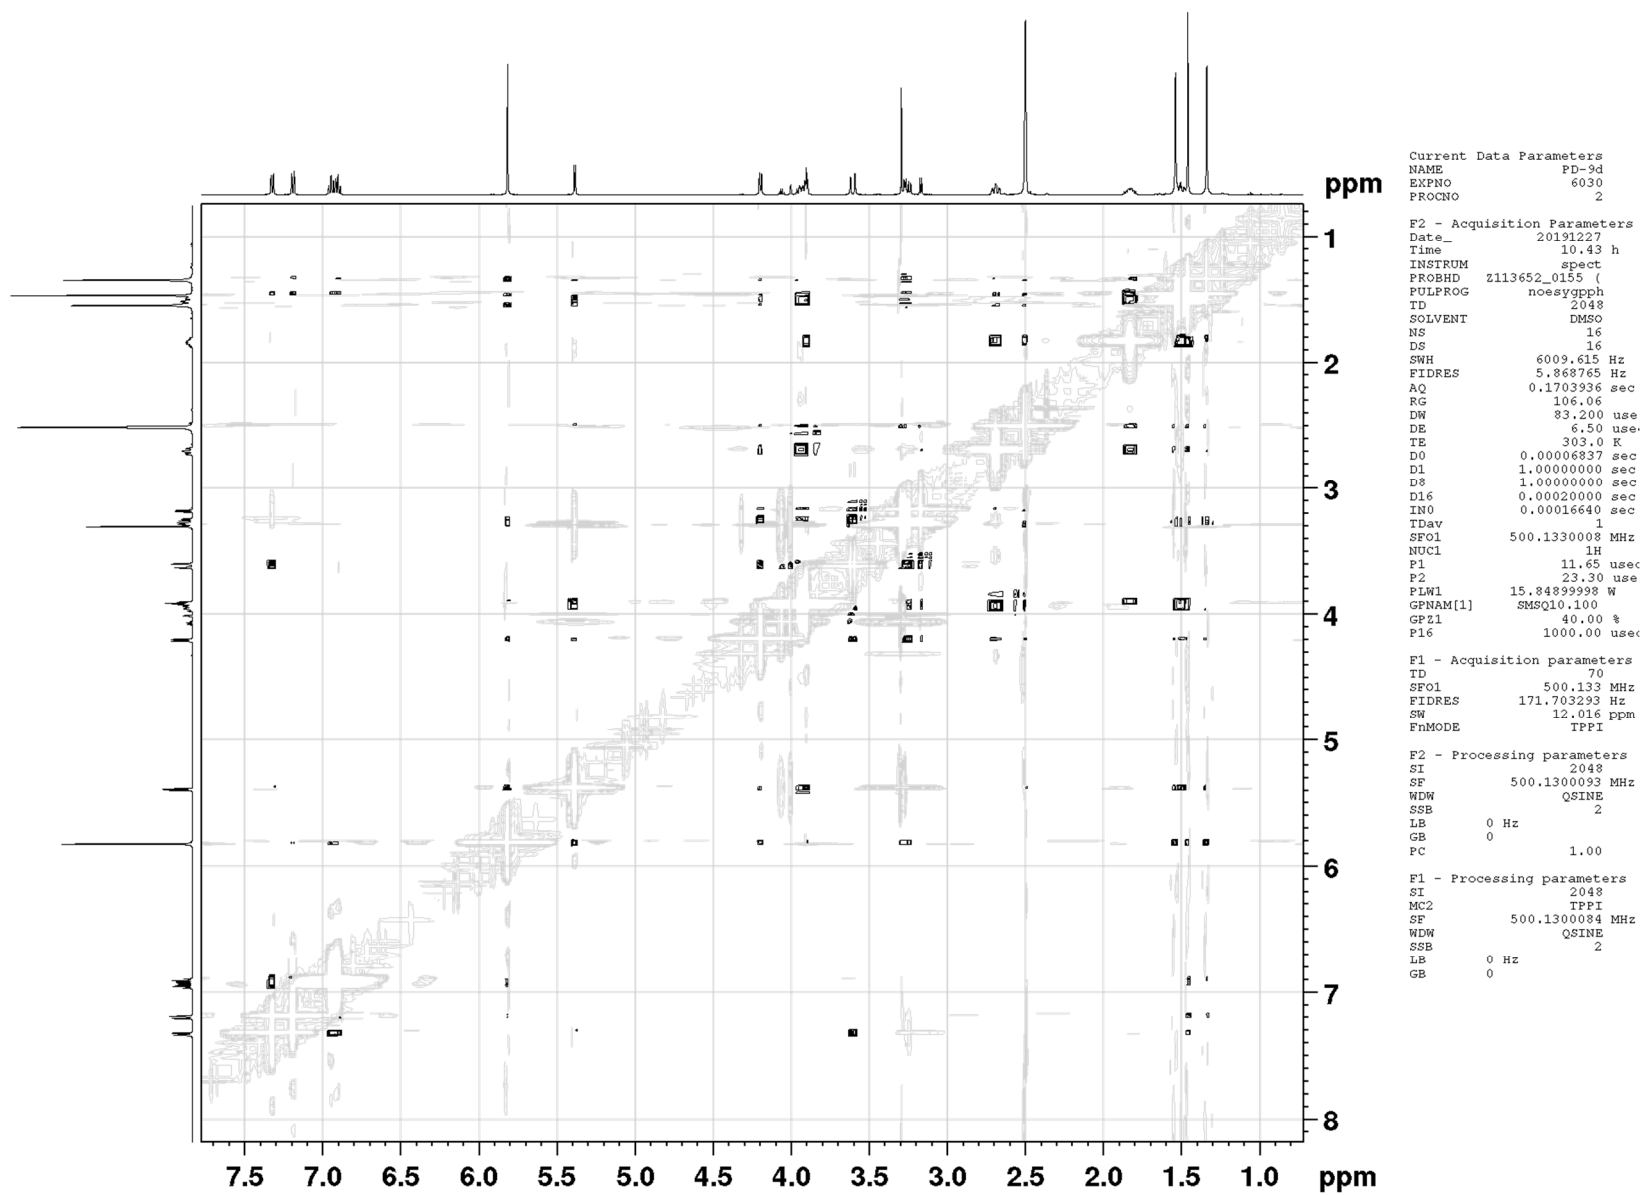

Figure S27. NOESY spectrum (500 MHz, DMSO-d<sub>6</sub>) of 1

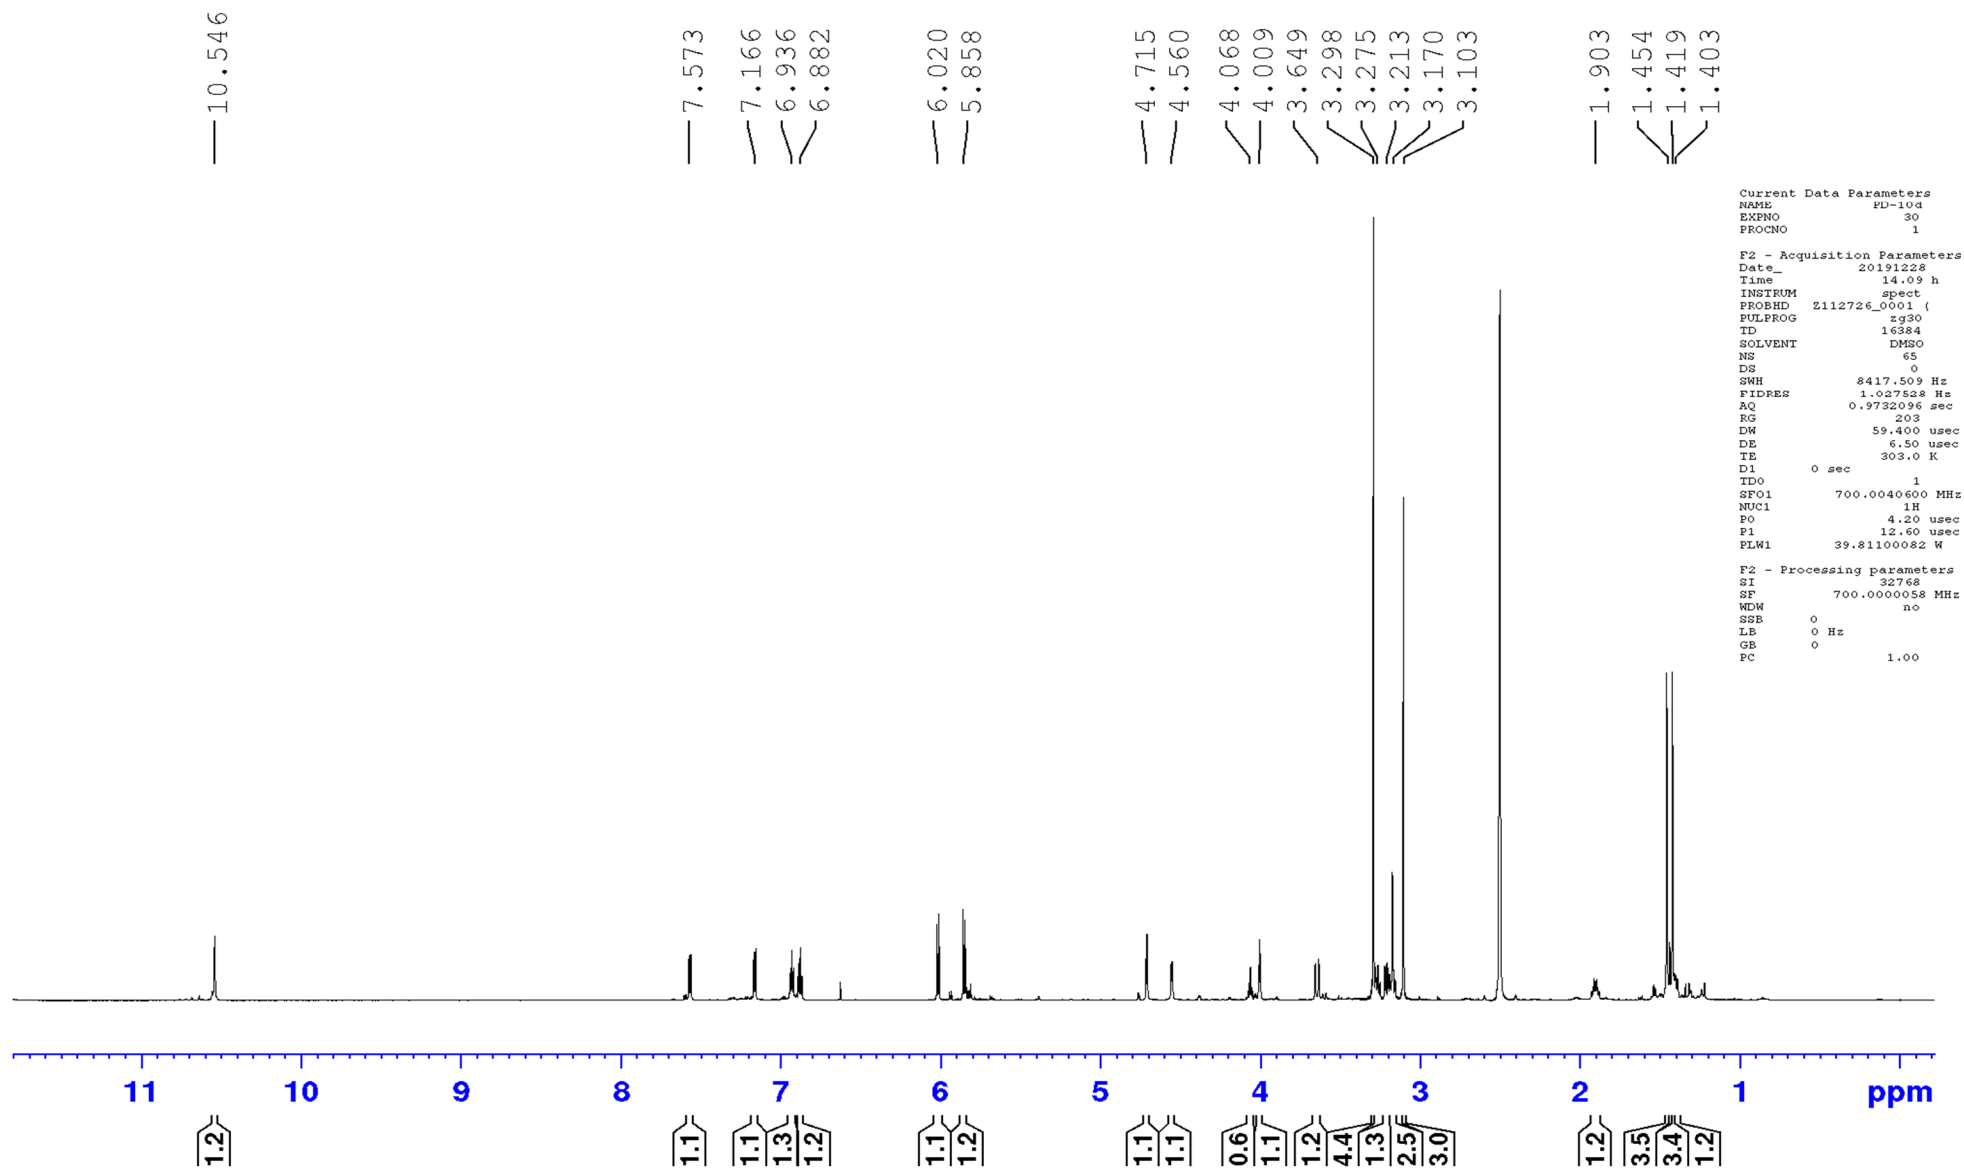

Figure S28. <sup>1</sup>H NMR spectrum (700 MHz, DMSO-d<sub>6</sub>) of **2**

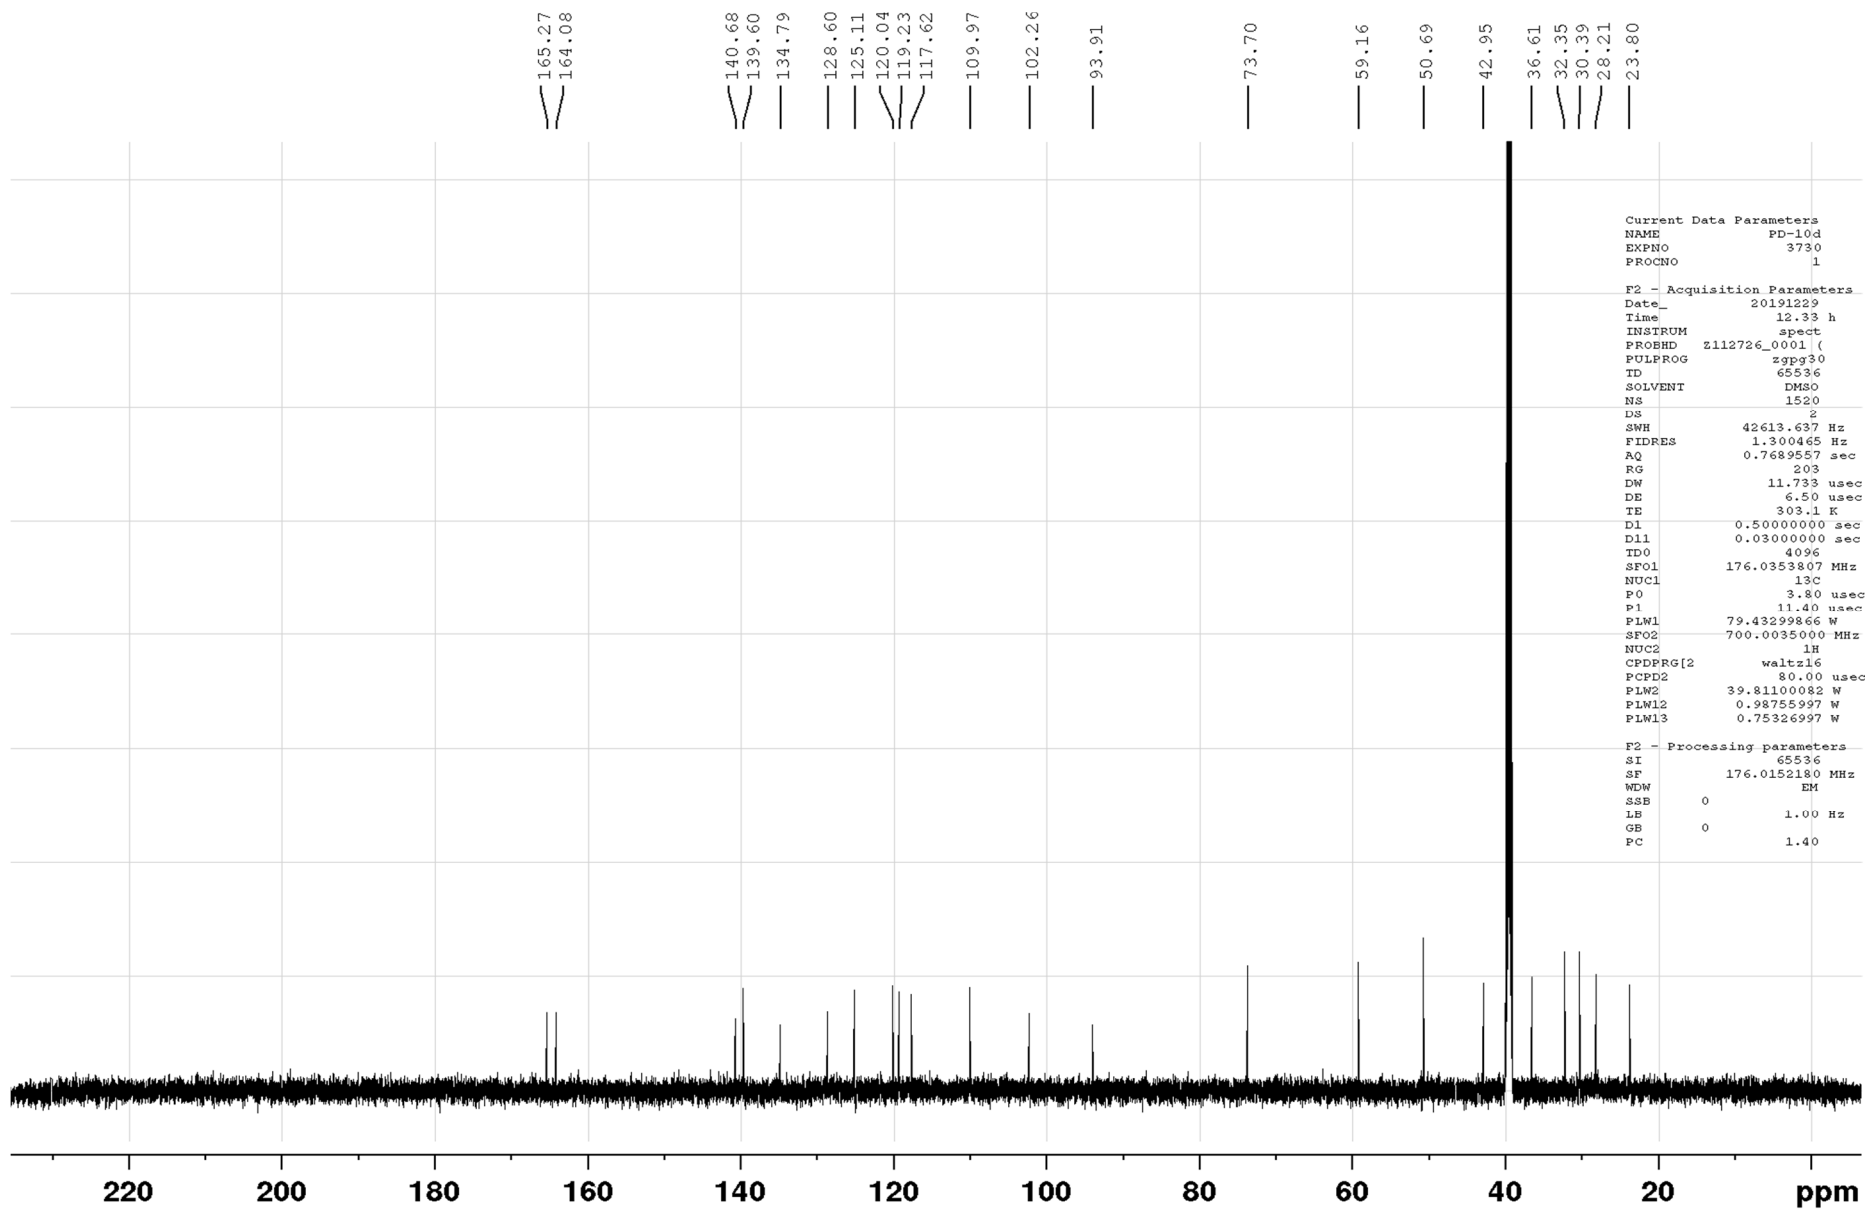

Figure S29. <sup>13</sup>C NMR spectrum (176 MHz, DMSO-d<sub>6</sub>) of 2



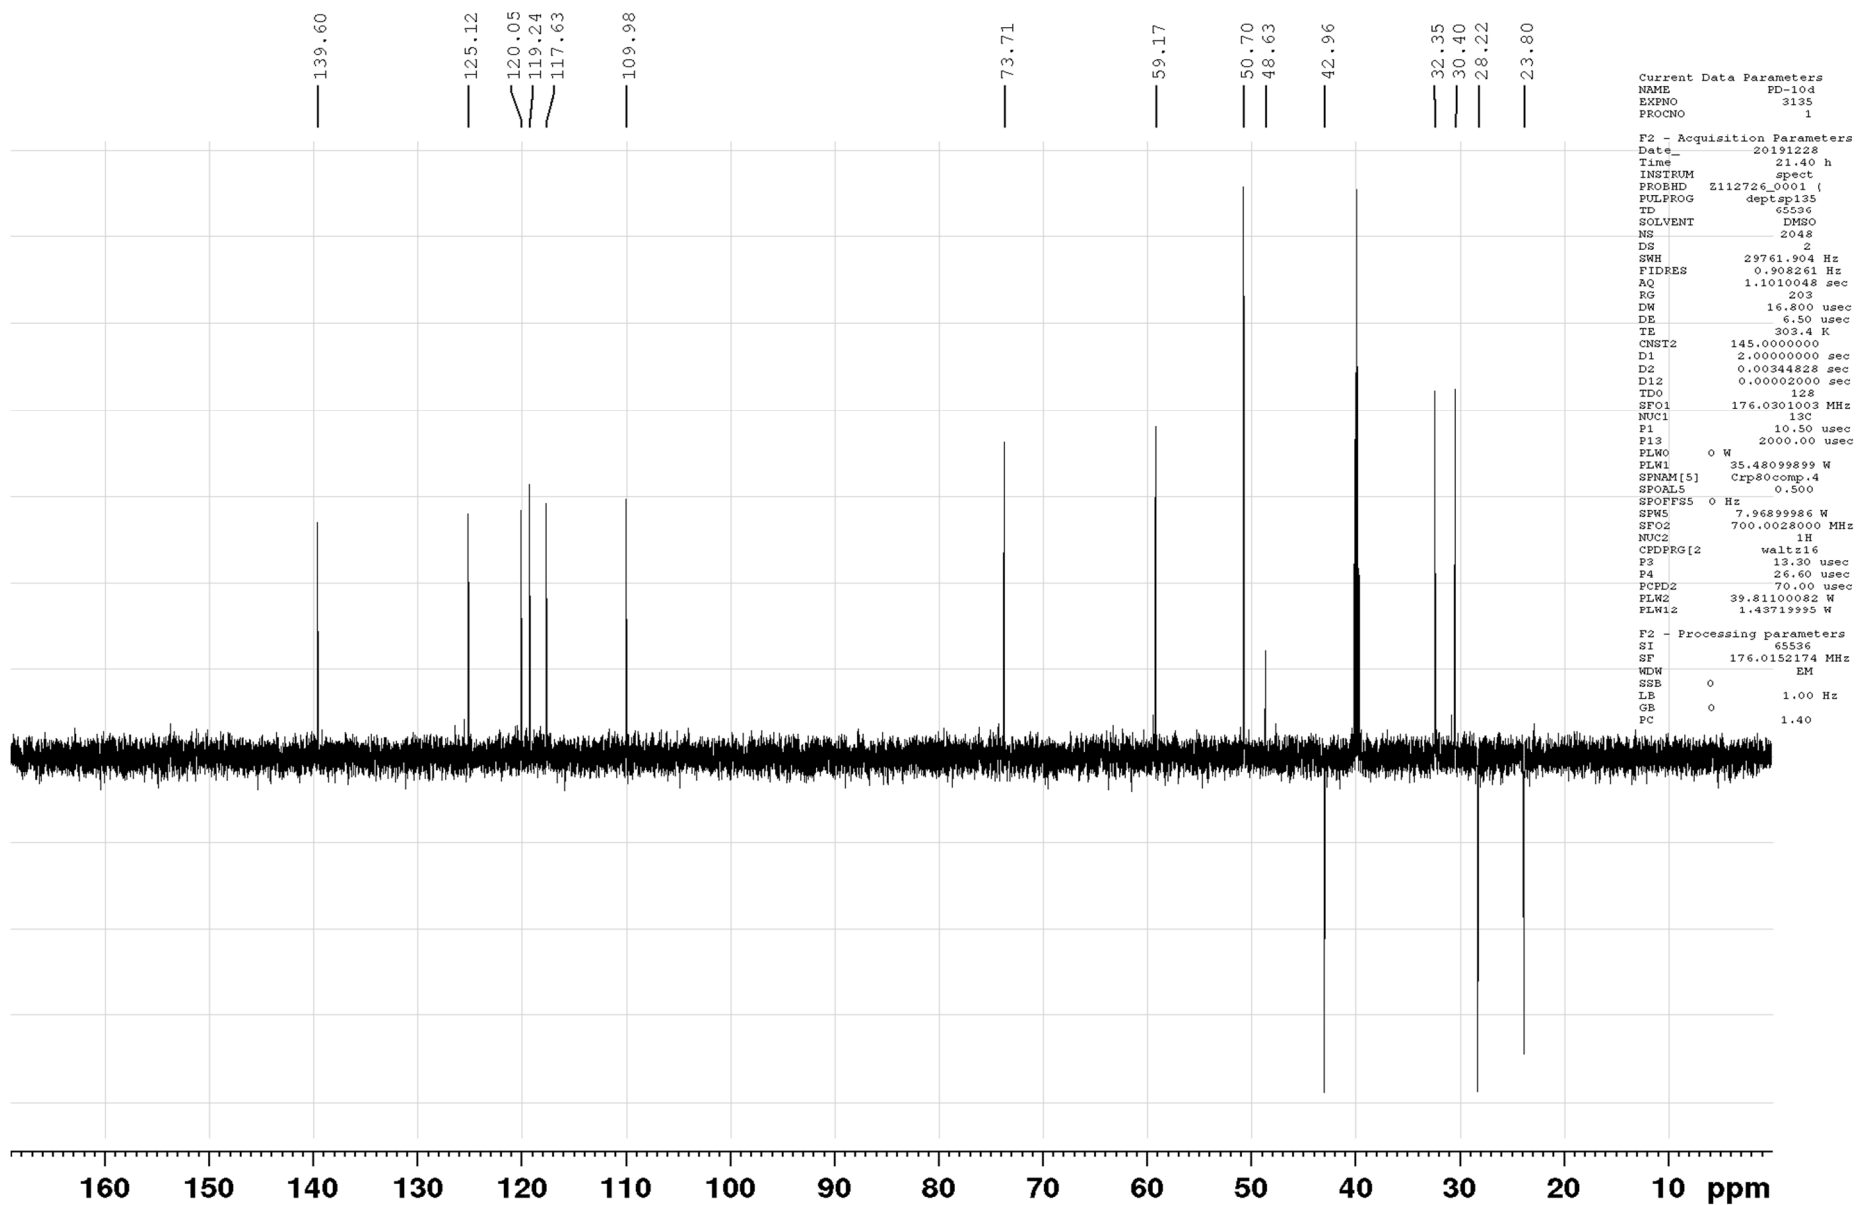

Figure S30. DEPT-135 NMR spectrum (176 MHz, DMSO-d<sub>6</sub>) of 2

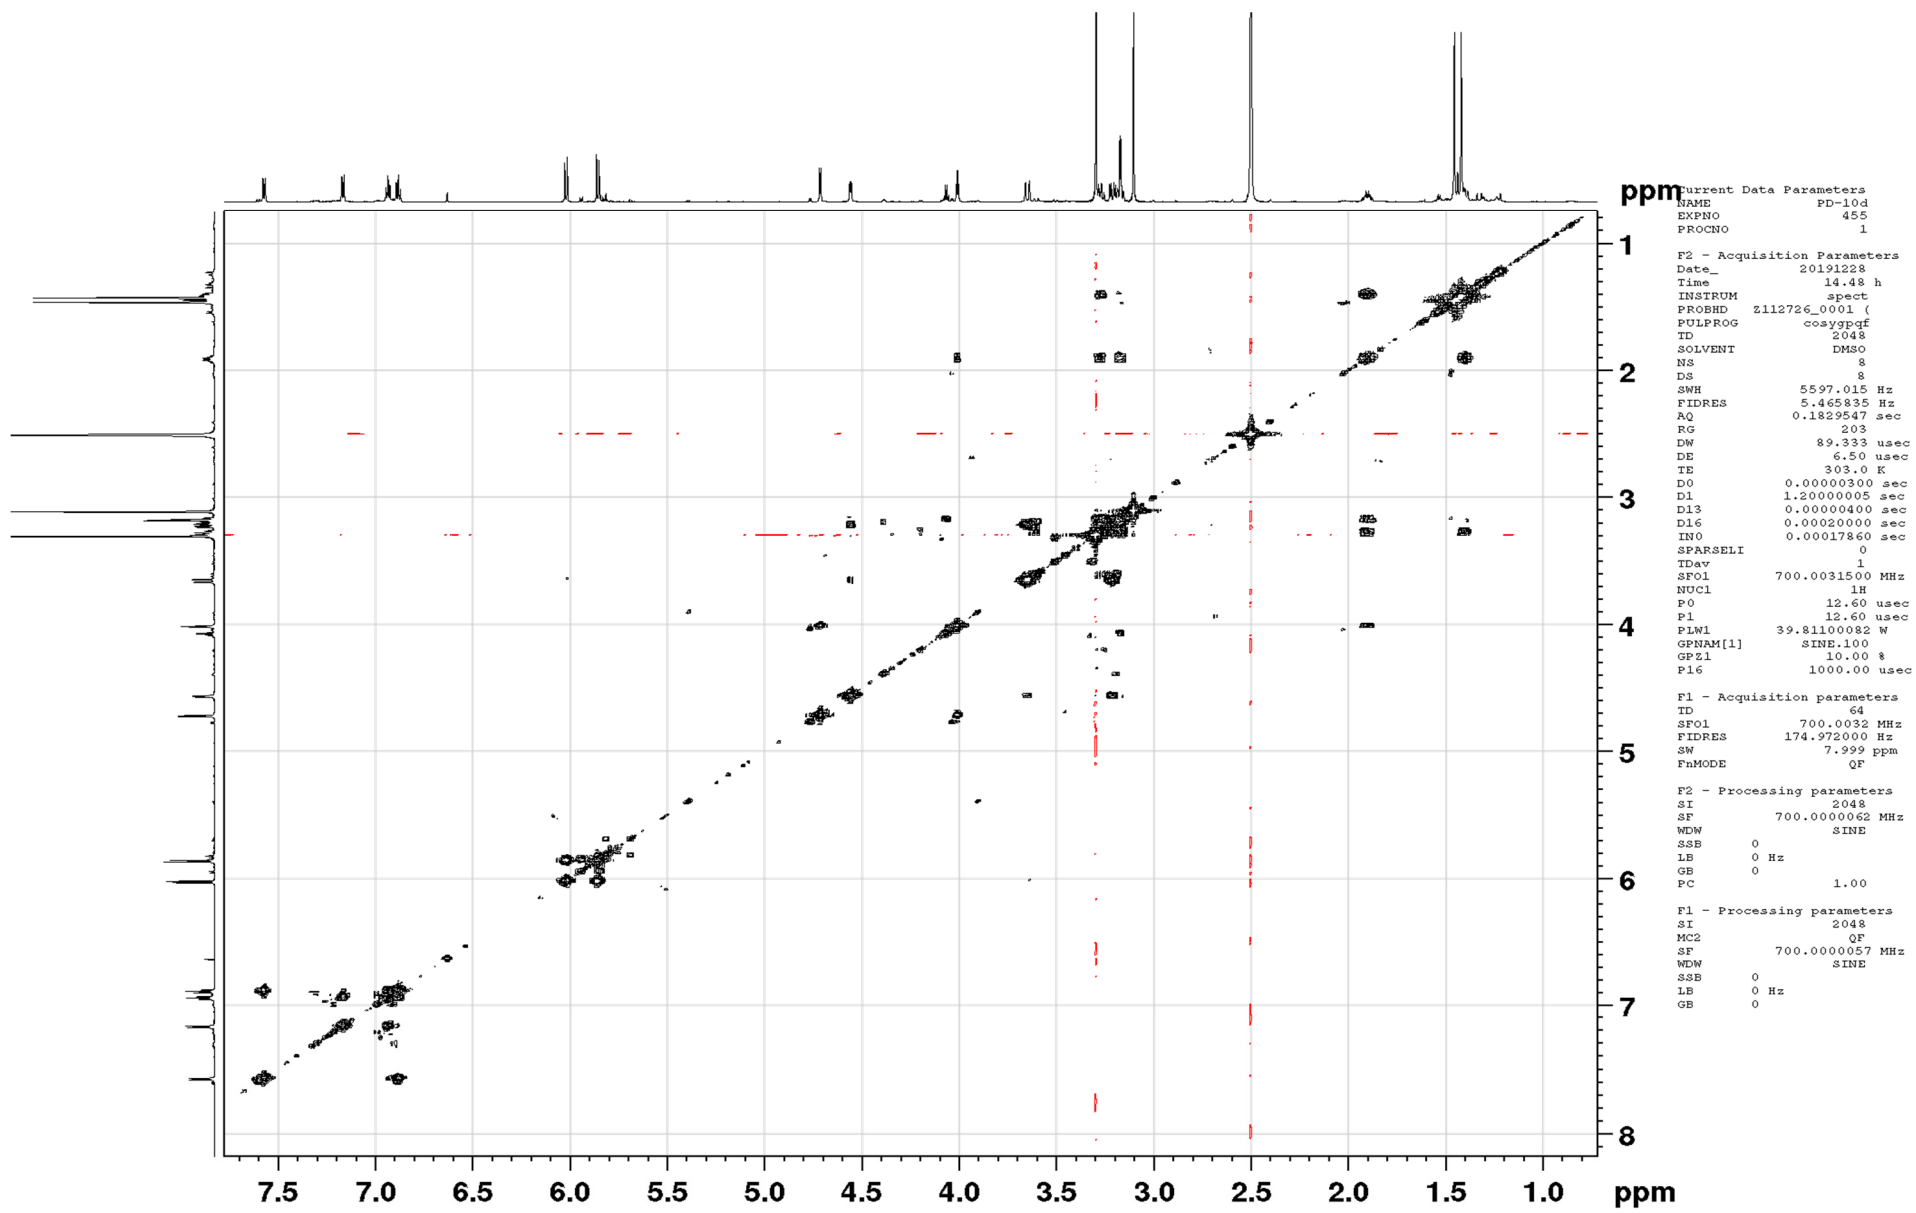

Figure S31. COSY-45 spectrum (700 MHz, DMSO-d6) of 2

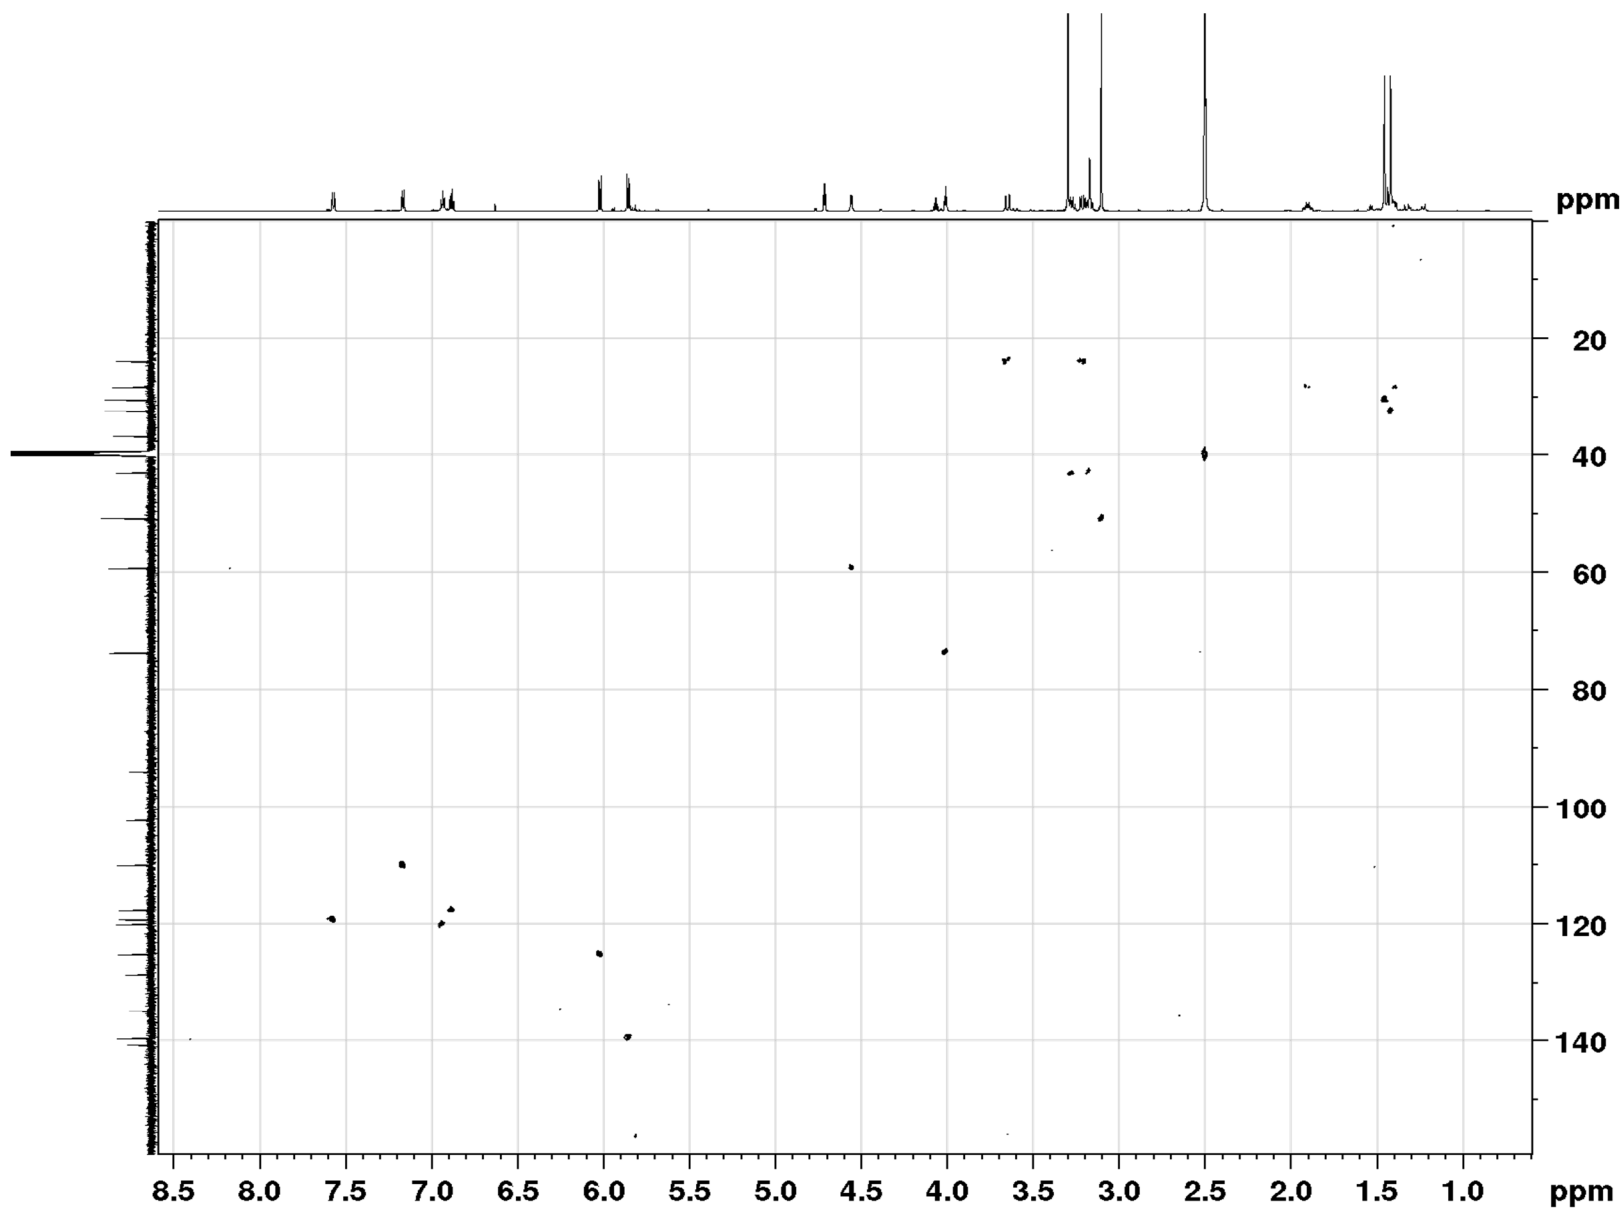

```

Current Data Parameters
NAME          PD-104
EXPNO        7130
PROCNO       1

F2 - Acquisition Parameters
Date_        20191229
Time         11.42 h
INSTRUM      spect
PROBHD       E112726_0001 (
PULPROG      hsqcetgps1sp2.2
TD           2048
SOLVENT      DMSO
NS           8
DS           48
SWH          5597.011 Hz
FIDRES       5.465835 Hz
AQ           0.1829547 sec
RG           203
DM           89.333 usec
DE           6.50 usec
TE           303.2 K
CNST2        145.000000
CNST17       -0.500000
D0           0.00000300 sec
D1           1.30000000 sec
D4           0.00172414 sec
D11          0.03000000 sec
D16          0.00200000 sec
D24          0.00100000 sec
IN0          0.00001780 sec
SFARSEL1     0
TDav         1
SFO1         700.0032200 MHz
NUC1         1H
P1           12.60 usec
P2           25.20 usec
P20          1000.00 usec
PLM1         39.81100962 W
SFO2         176.0292202 MHz
NUC2         13C
CPDPRG2      bi_p5m4sp_4sp.2
P3           11.40 usec
P14          500.00 usec
P24          2000.00 usec
P63          1500.00 usec
ELM0         0 W
PLM2         79.43239866 W
PLM12        3.41260004 W
SPNAM[3]     Crp80,0.5,20.1
SFOAL3       0 Hz
SFOFFS3      0 Hz
SPW3         21.03000069 W
SPNAM[7]     Crp80comp.4
SFOAL7       0 Hz
SFOFFS7      0 Hz
SPW7         21.03000069 W
SPNAM[14]    Crp42,1.5,20.2
SFOAL14      0 Hz
SFOFFS14     0 Hz
SPW14        8.83259964 W
SPNAM[31]    Crp42,1.5,20.2
SFOAL31      0 Hz
SFOFFS31     0 Hz
SPW31        2.20819998 W
GPNAM[1]     SINE.100
GPE1         80.00 %
GPNAM[2]     SINE.100
GPE2         20.00 %
GPNAM[3]     SINE.100
GPE3         11.00 %
GPNAM[4]     SINE.100
GPE4         -5.00 %
P16          1000.00 usec
P19          1000.00 usec

F1 - Acquisition parameters
TD           64
SFO1         176.0292 MHz
FIDRES       877.808960 Hz
SW           159.375 ppm
P0MODE       Echo-Antiecho

F2 - Processing parameters
SI           2048
SF           700.000052 MHz
WDW          QSINE
SSB          2
LB           0 Hz
GB           0
Fc           1.00

F1 - Processing parameters
SI           4096
MC2          echo-antiecho
SF           176.0152162 MHz
WDW          QSINE
SSB          8
LB           0 Hz
GB           0

```

Figure S32. HSQC spectrum (700 MHz, DMSO-d6) of 2

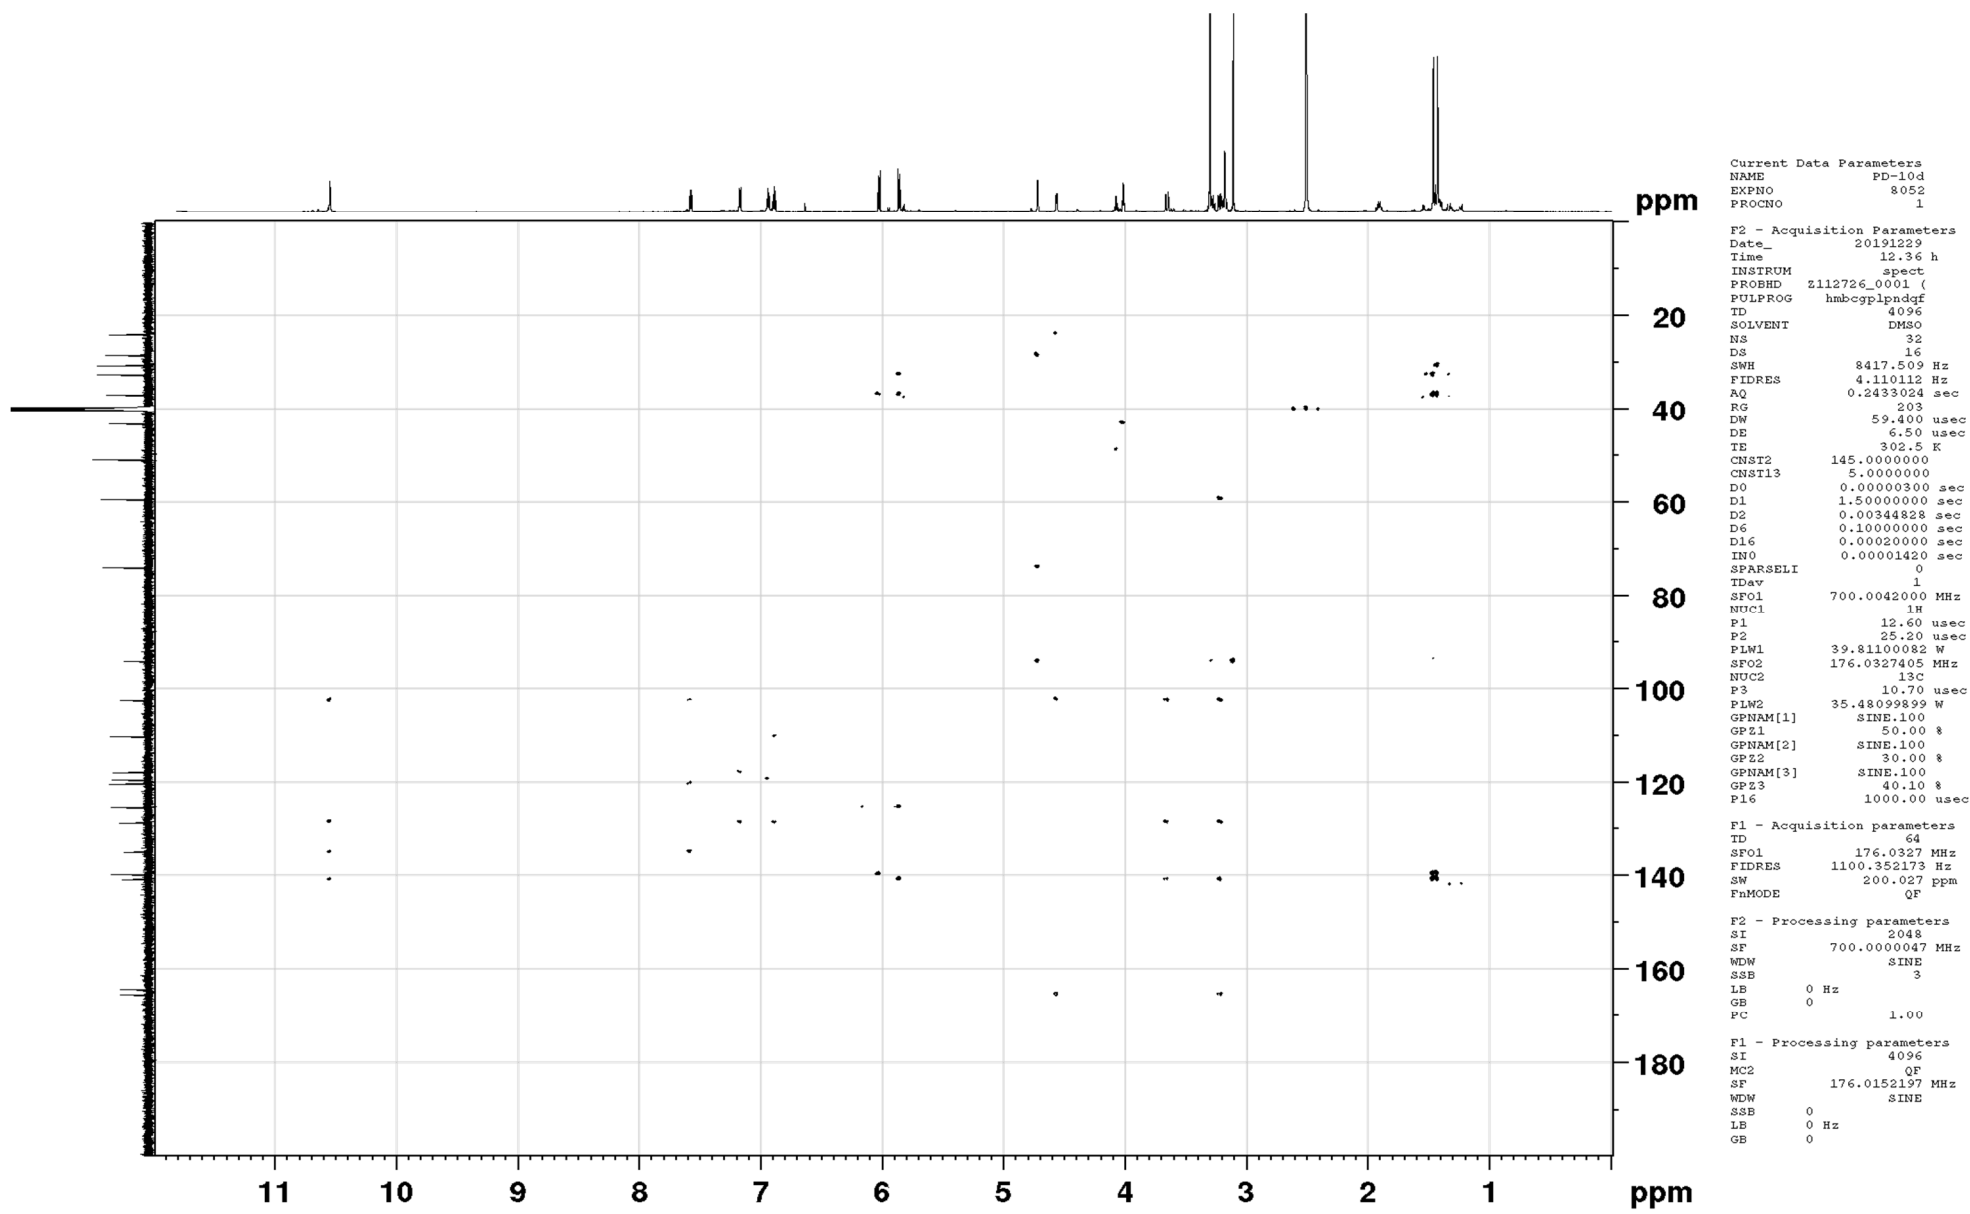

Figure S33. HMBC spectrum (700 MHz, DMSO-d<sub>6</sub>) of 2

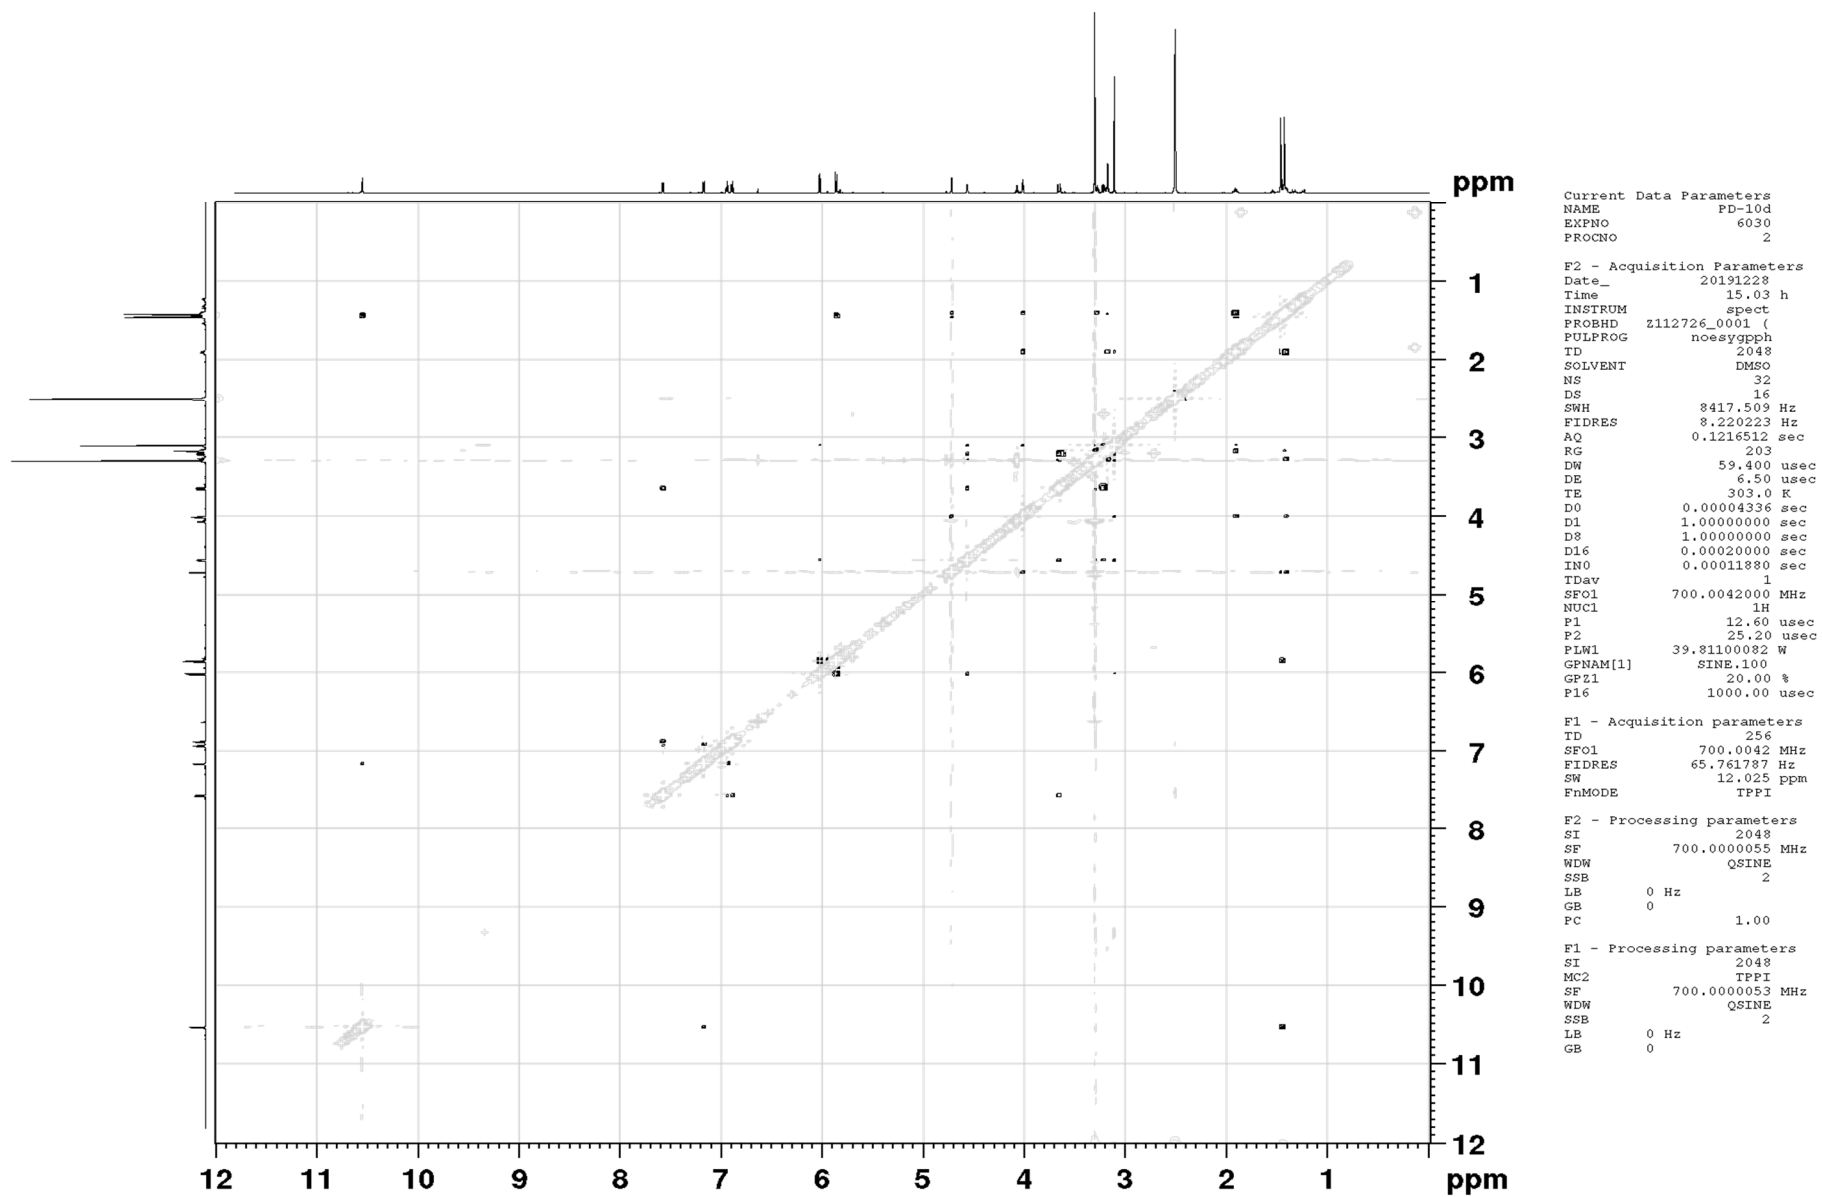

Figure S34. NOESY spectrum (700 MHz, DMSO-d<sub>6</sub>) of 2

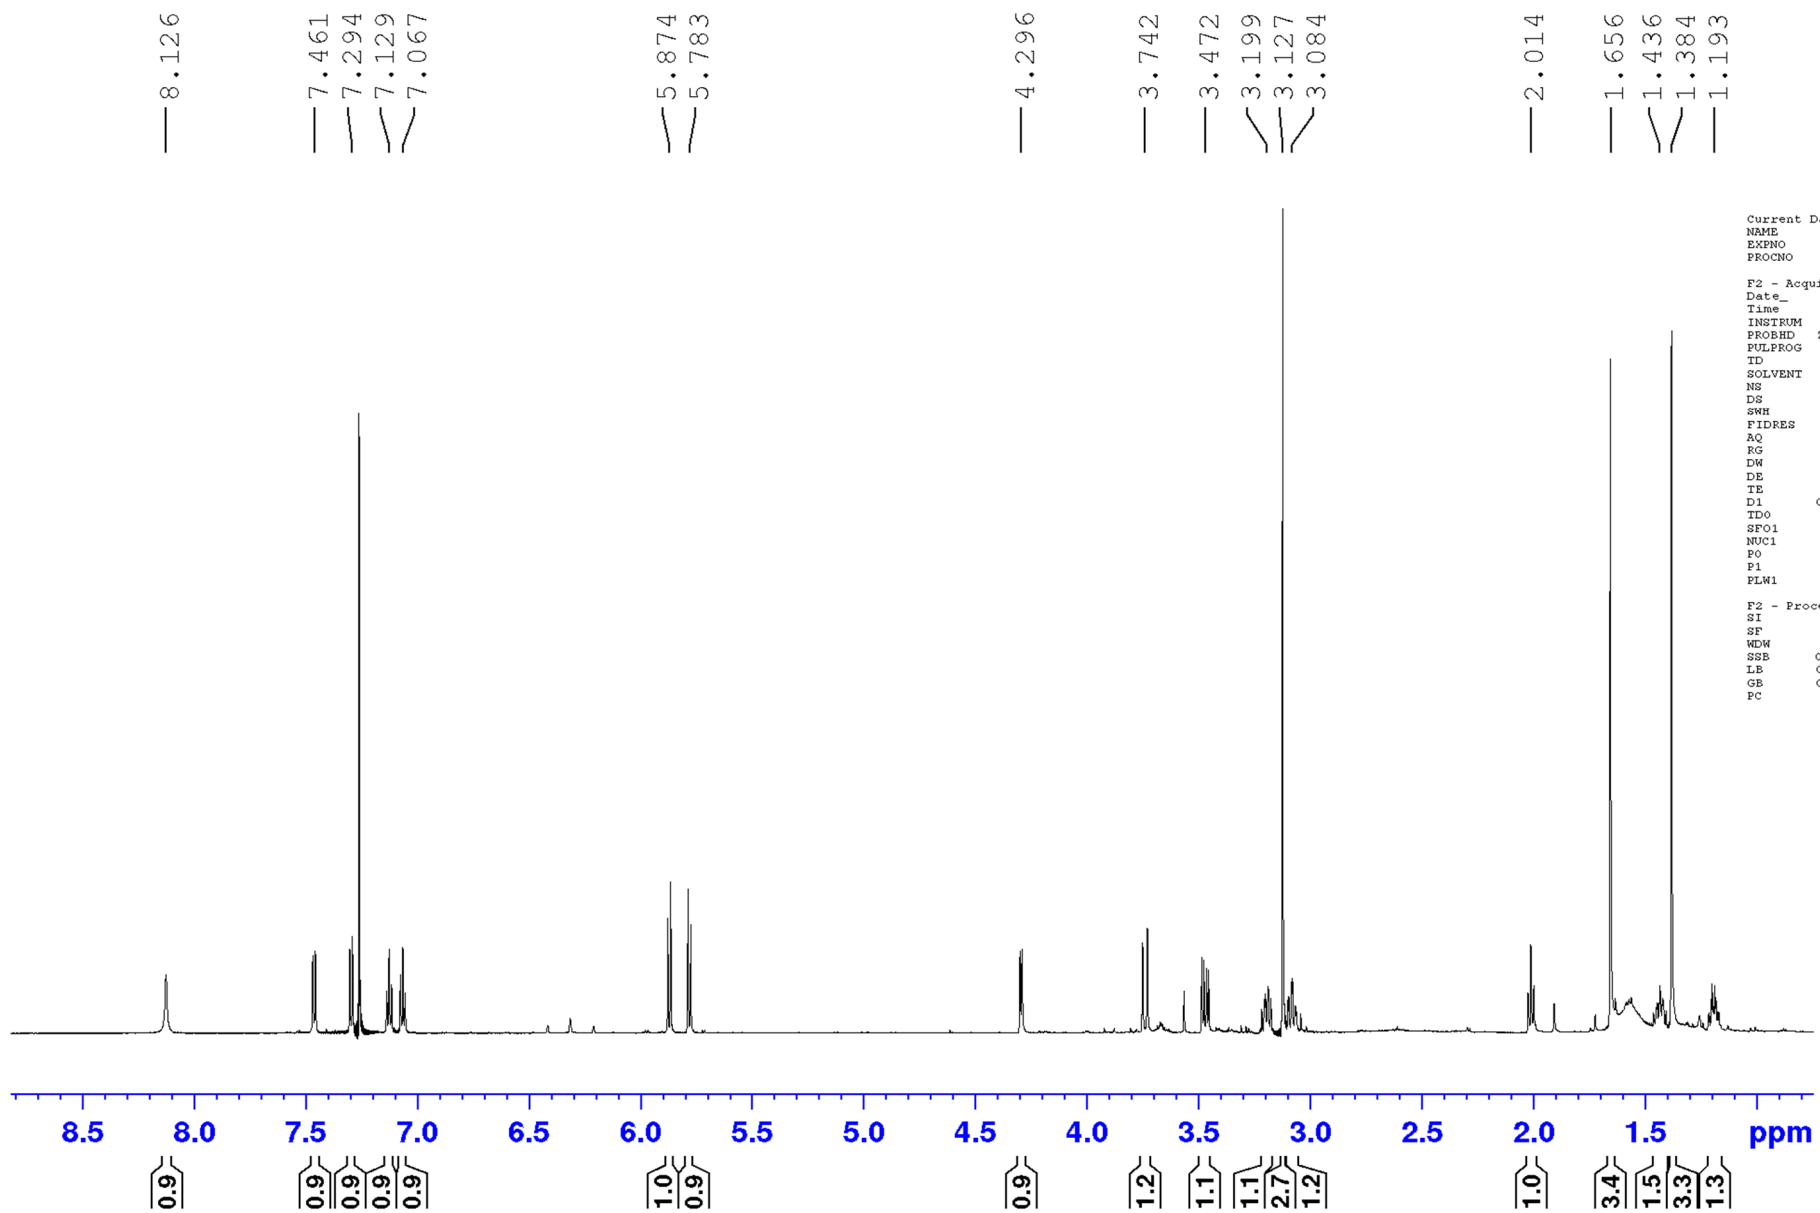

```

Current Data Parameters
NAME          BD-15
EXPNO         30
PROCNO        1

F2 - Acquisition Parameters
Date_         20200212
Time          14.46 h
INSTRUM       spect
PROBHD        Z112726_0001 (
PULPROG       zg30
TD            16384
SOLVENT       CDCl3
NS            170
DS            0
SWH           11160.714 Hz
FIDRES        1.362392 Hz
AQ            0.7340032 sec
RG            203
DW            44.800 usec
DE            6.50 usec
TE            304.8 K
D1            0 sec
TDO           1
SFO1          700.0053900 MHz
NUC1          1H
FO            4.20 usec
P1            12.60 usec
PLM1          39.81100082 W

F2 - Processing parameters
SI            32768
SF            700.0000184 MHz
WDW           no
SSB           0
LB            0 Hz
GB            0
PC            1.00

```

Figure S35. <sup>1</sup>H NMR spectrum (700 MHz, CD<sub>3</sub>OD) of 3

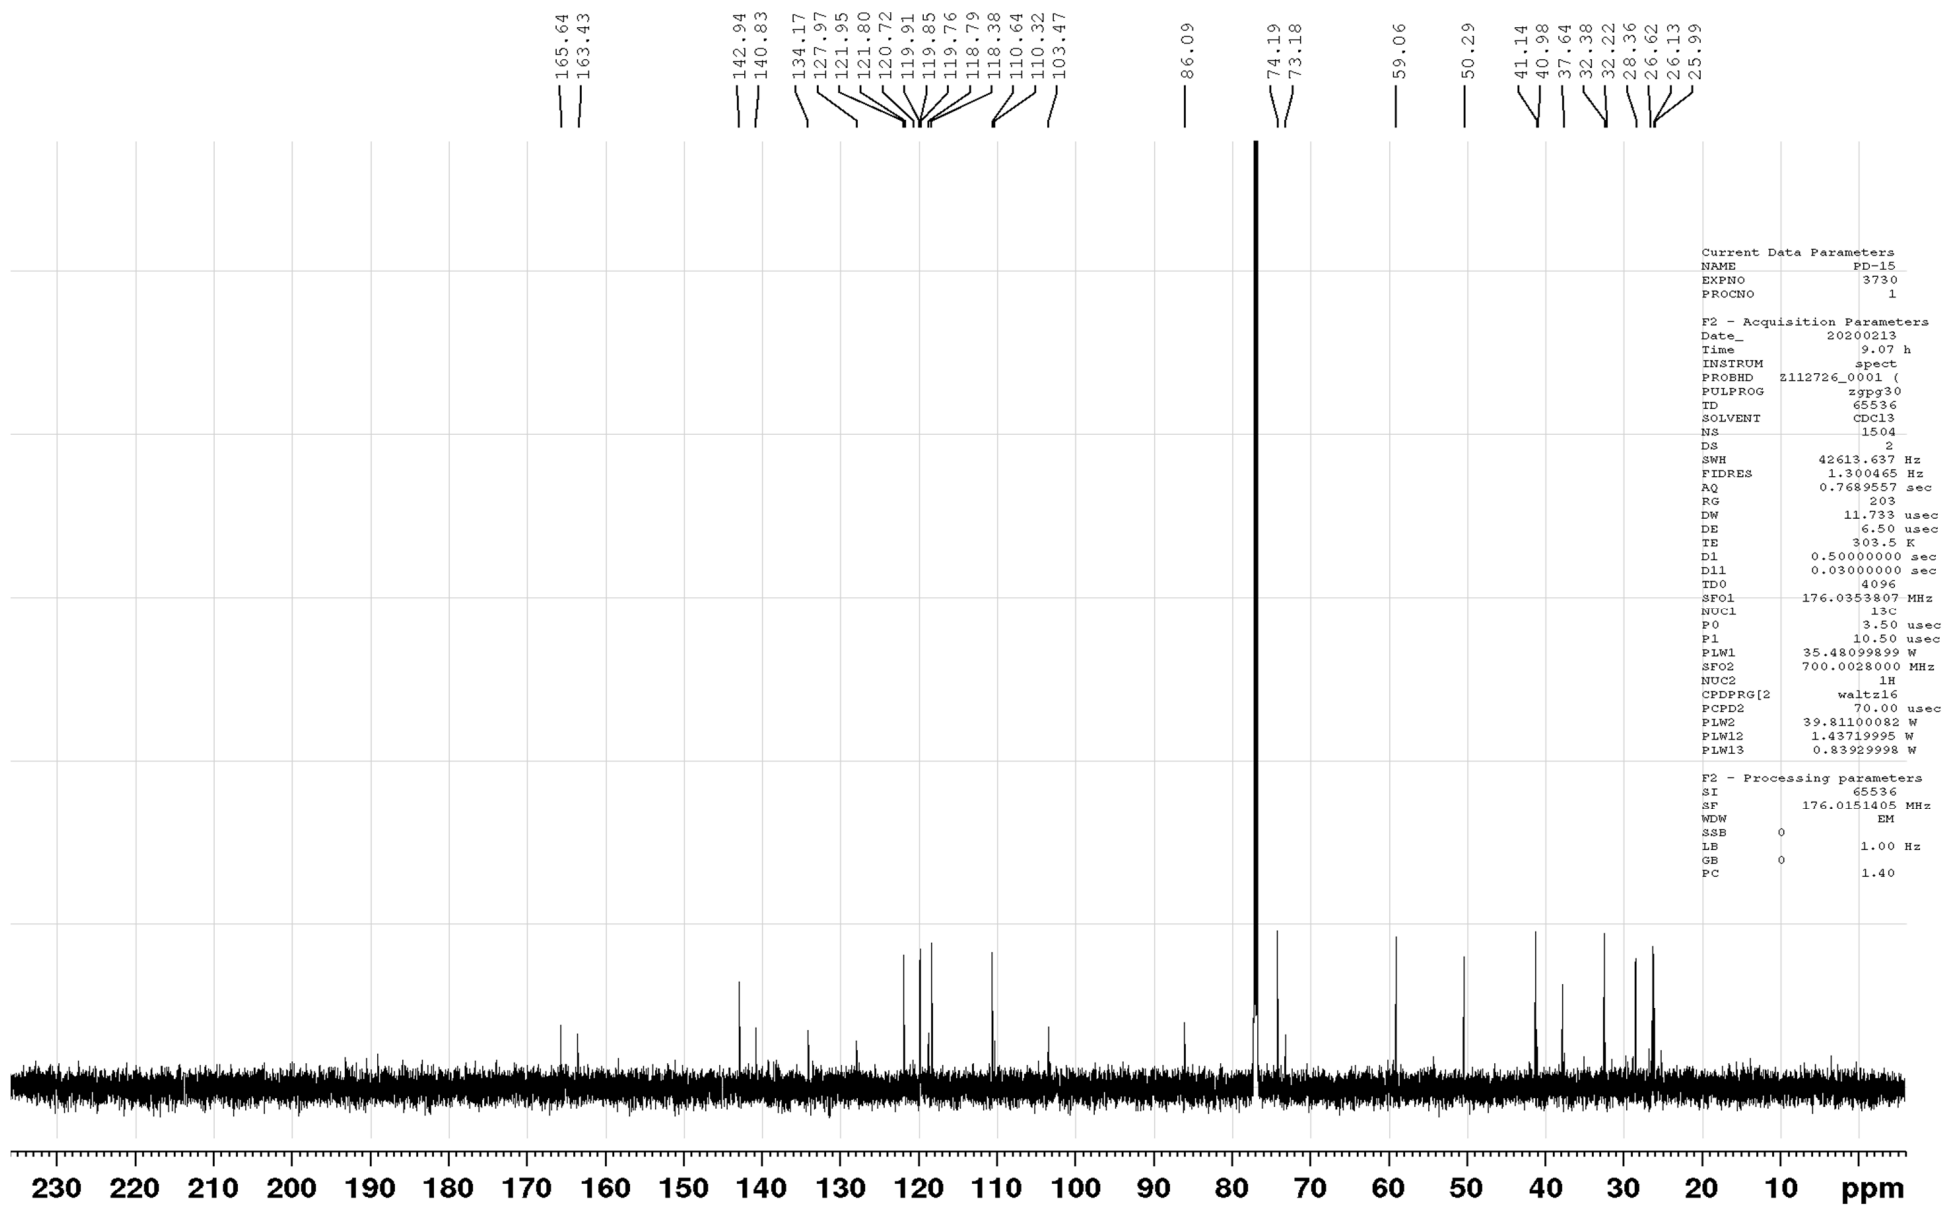

Figure S36. <sup>13</sup>C NMR spectrum (176 MHz, CD<sub>3</sub>OD) of 3

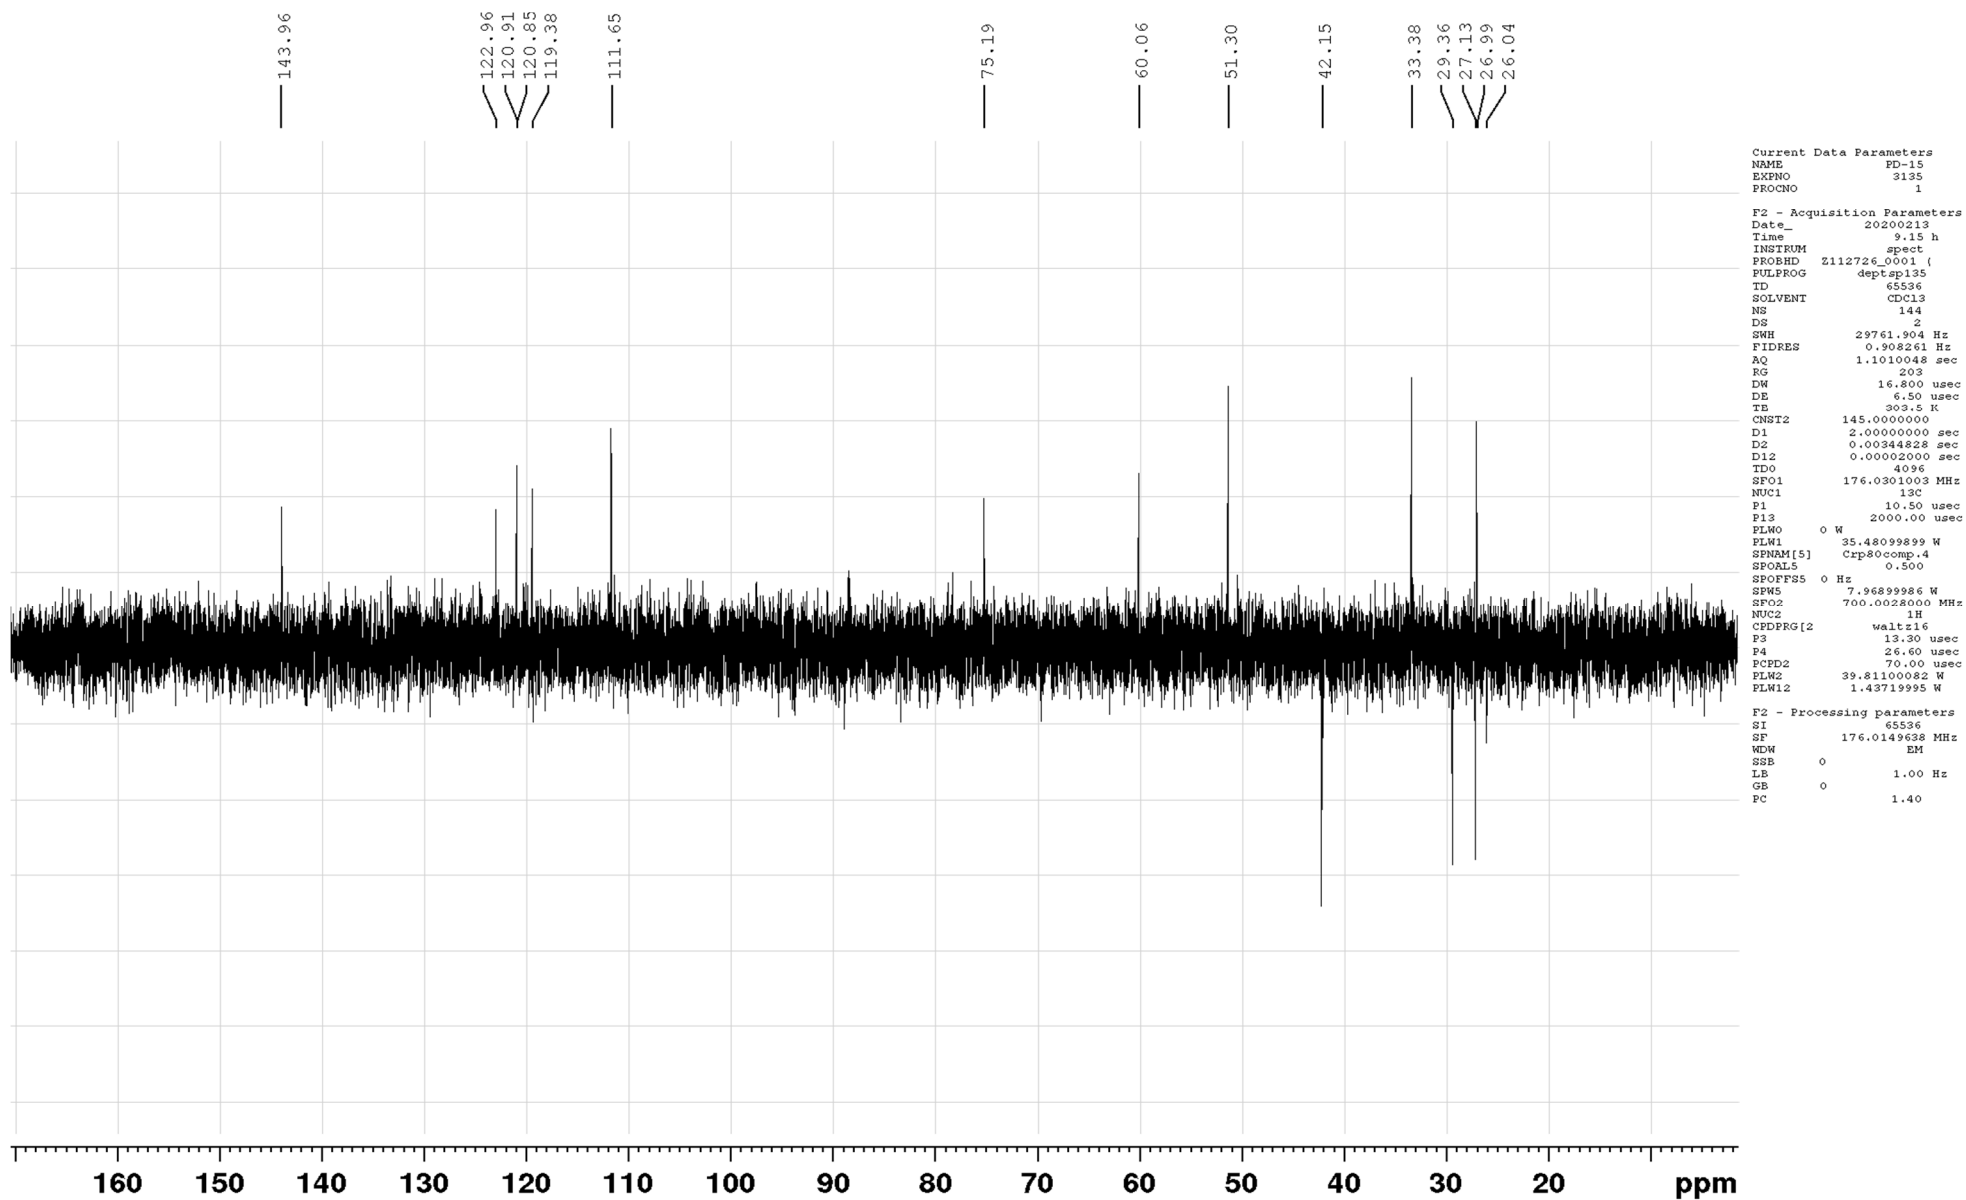

Figure S37. DEPT-135 NMR spectrum (176 MHz, CD<sub>3</sub>OD) of 3



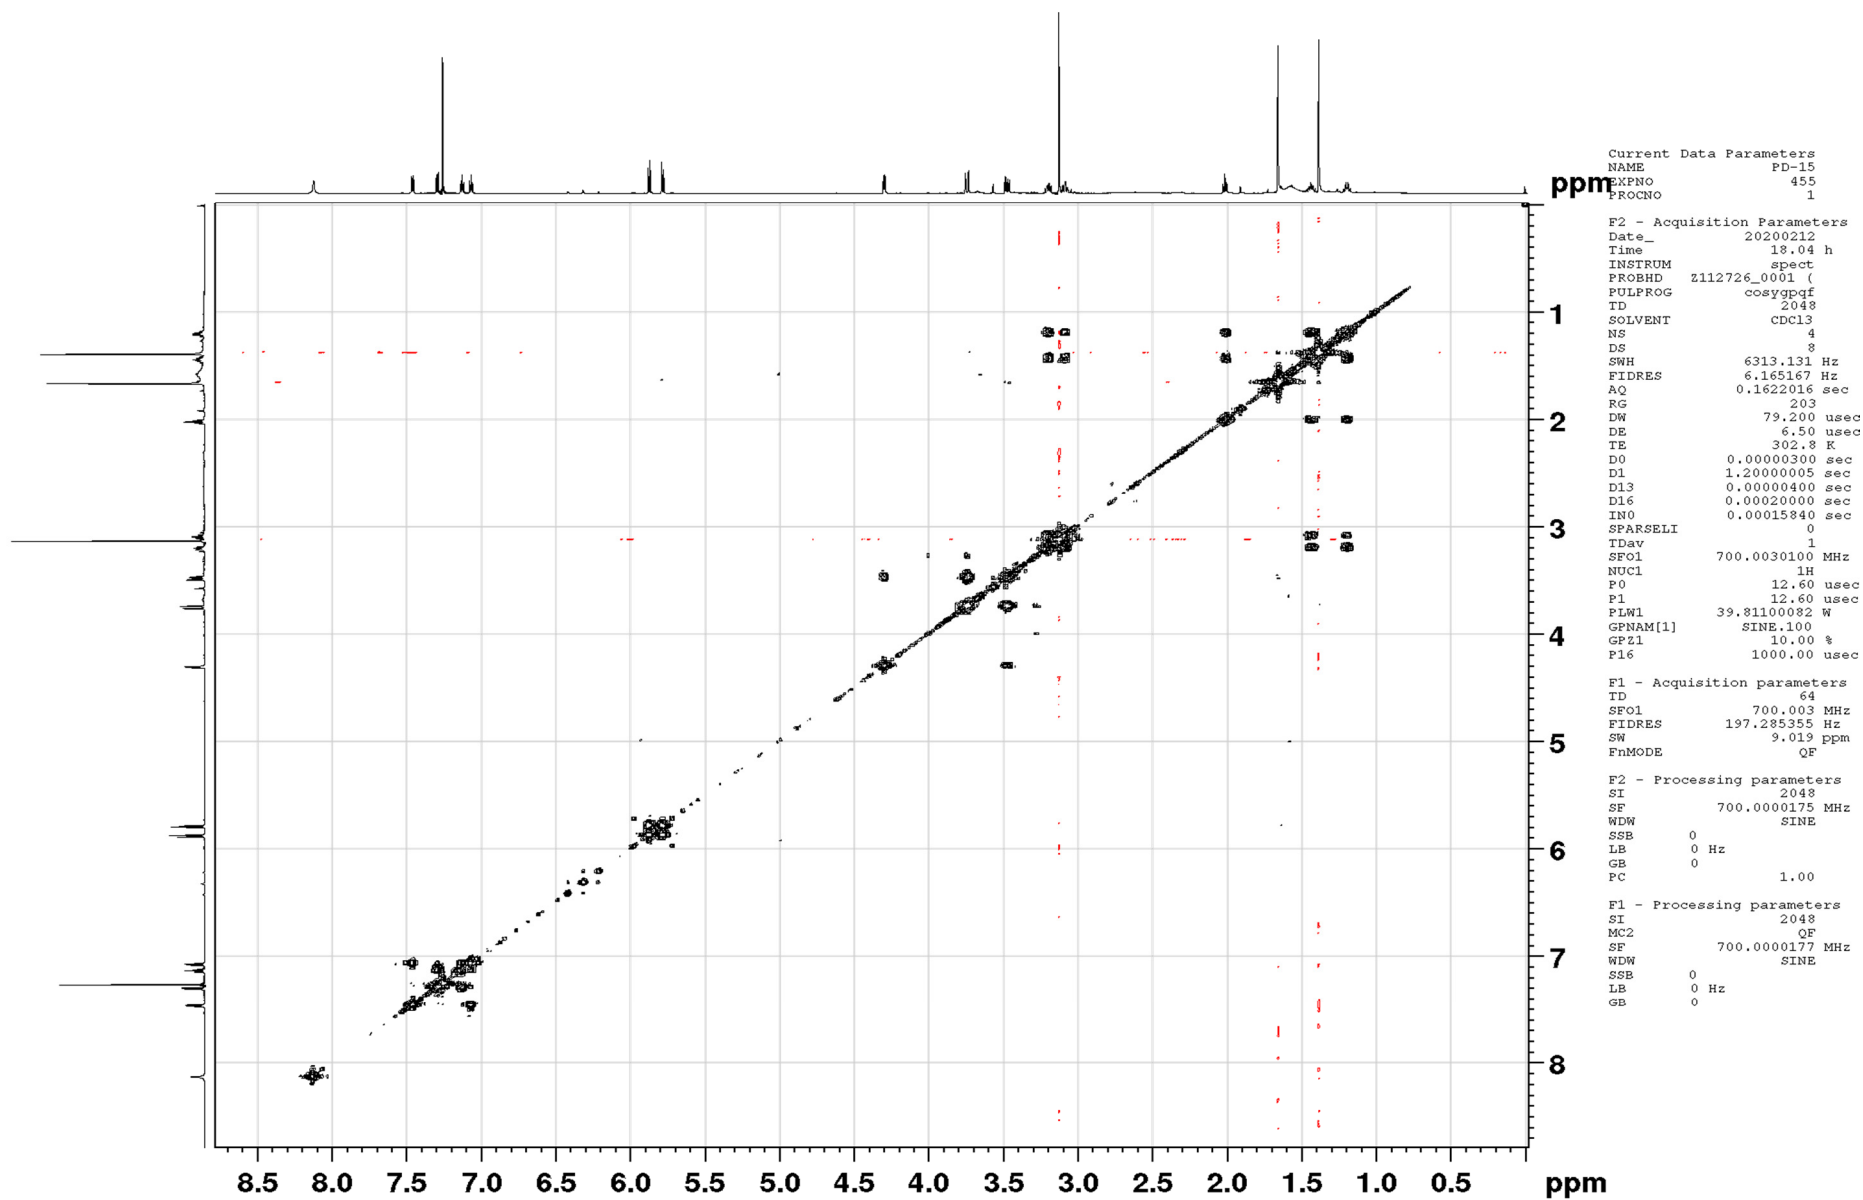

Figure S38. COSY-45 spectrum (700 MHz, CD<sub>3</sub>OD) of 3

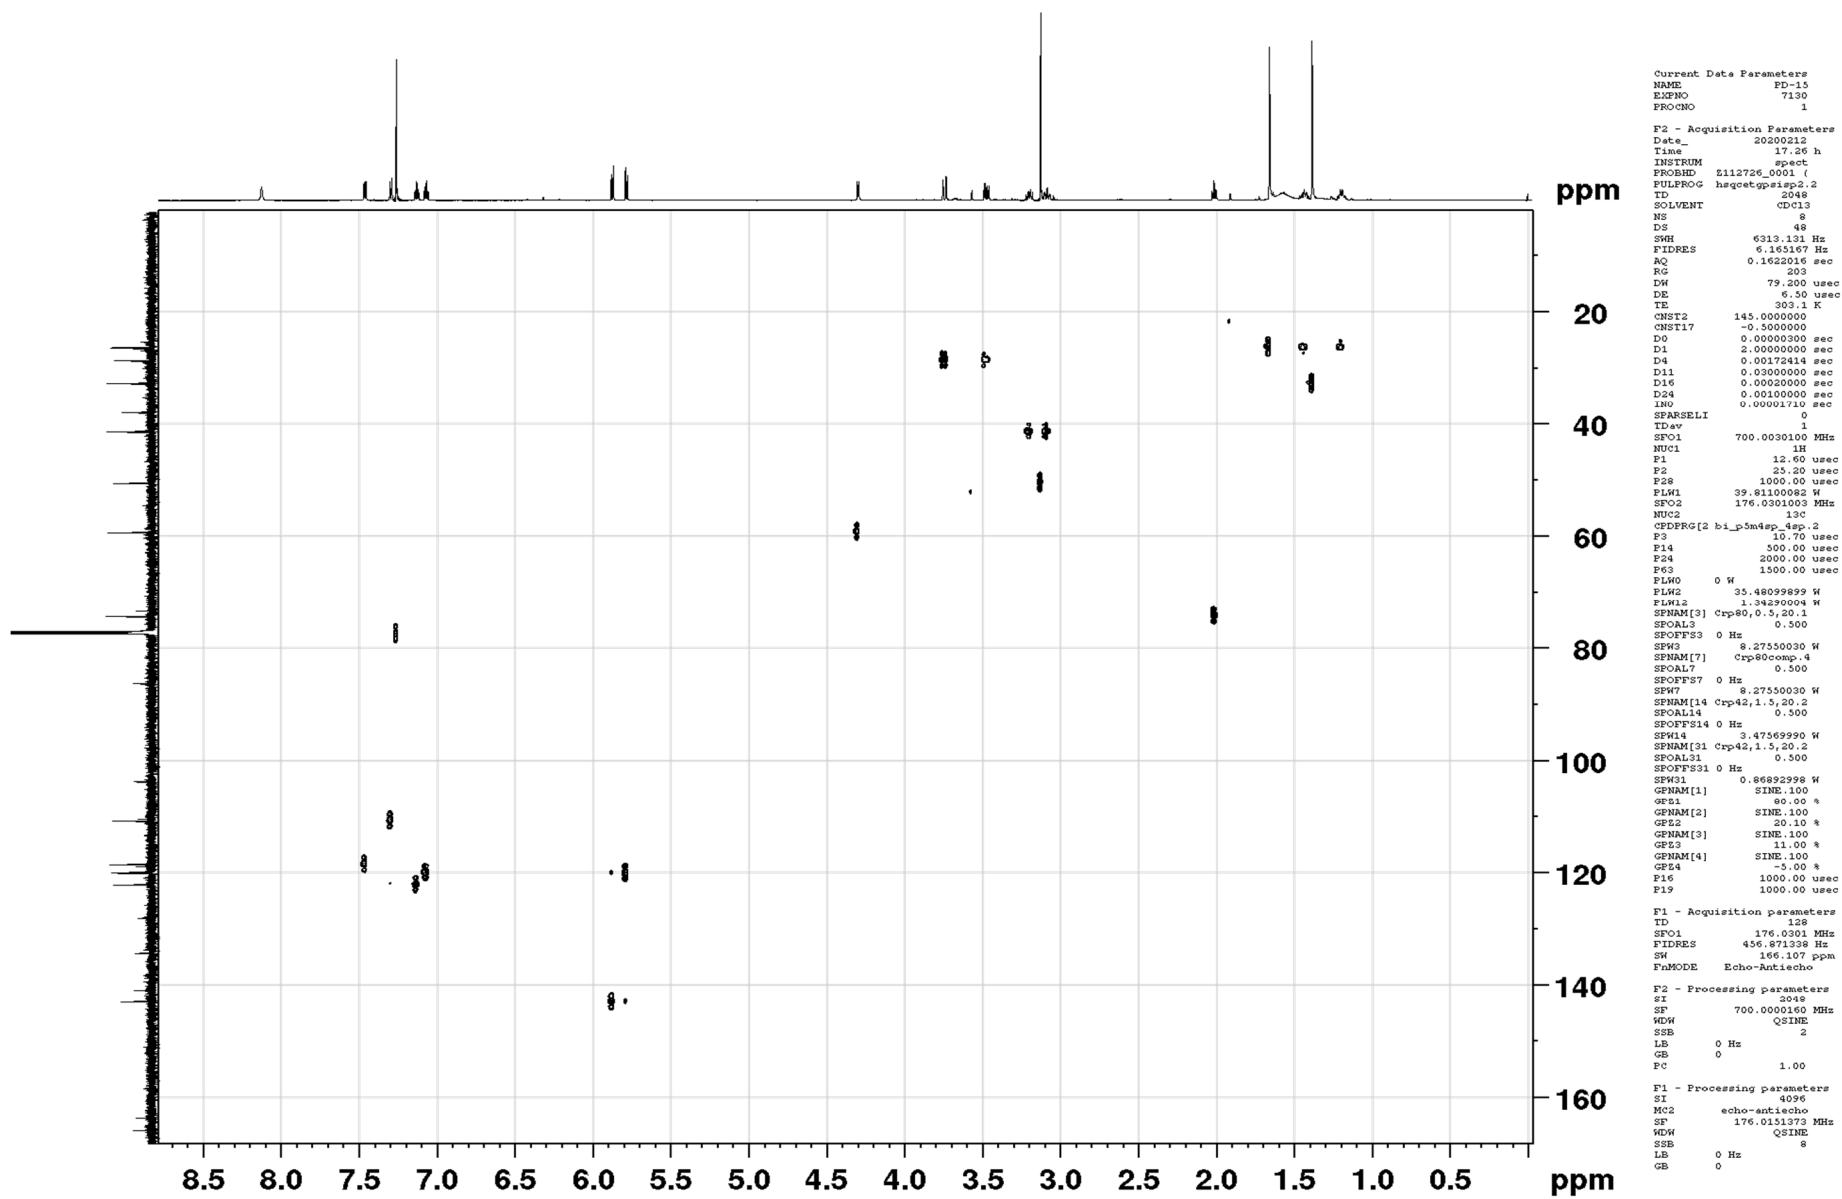

Figure S39. HSQC spectrum (700 MHz, CD<sub>3</sub>OD) of 3

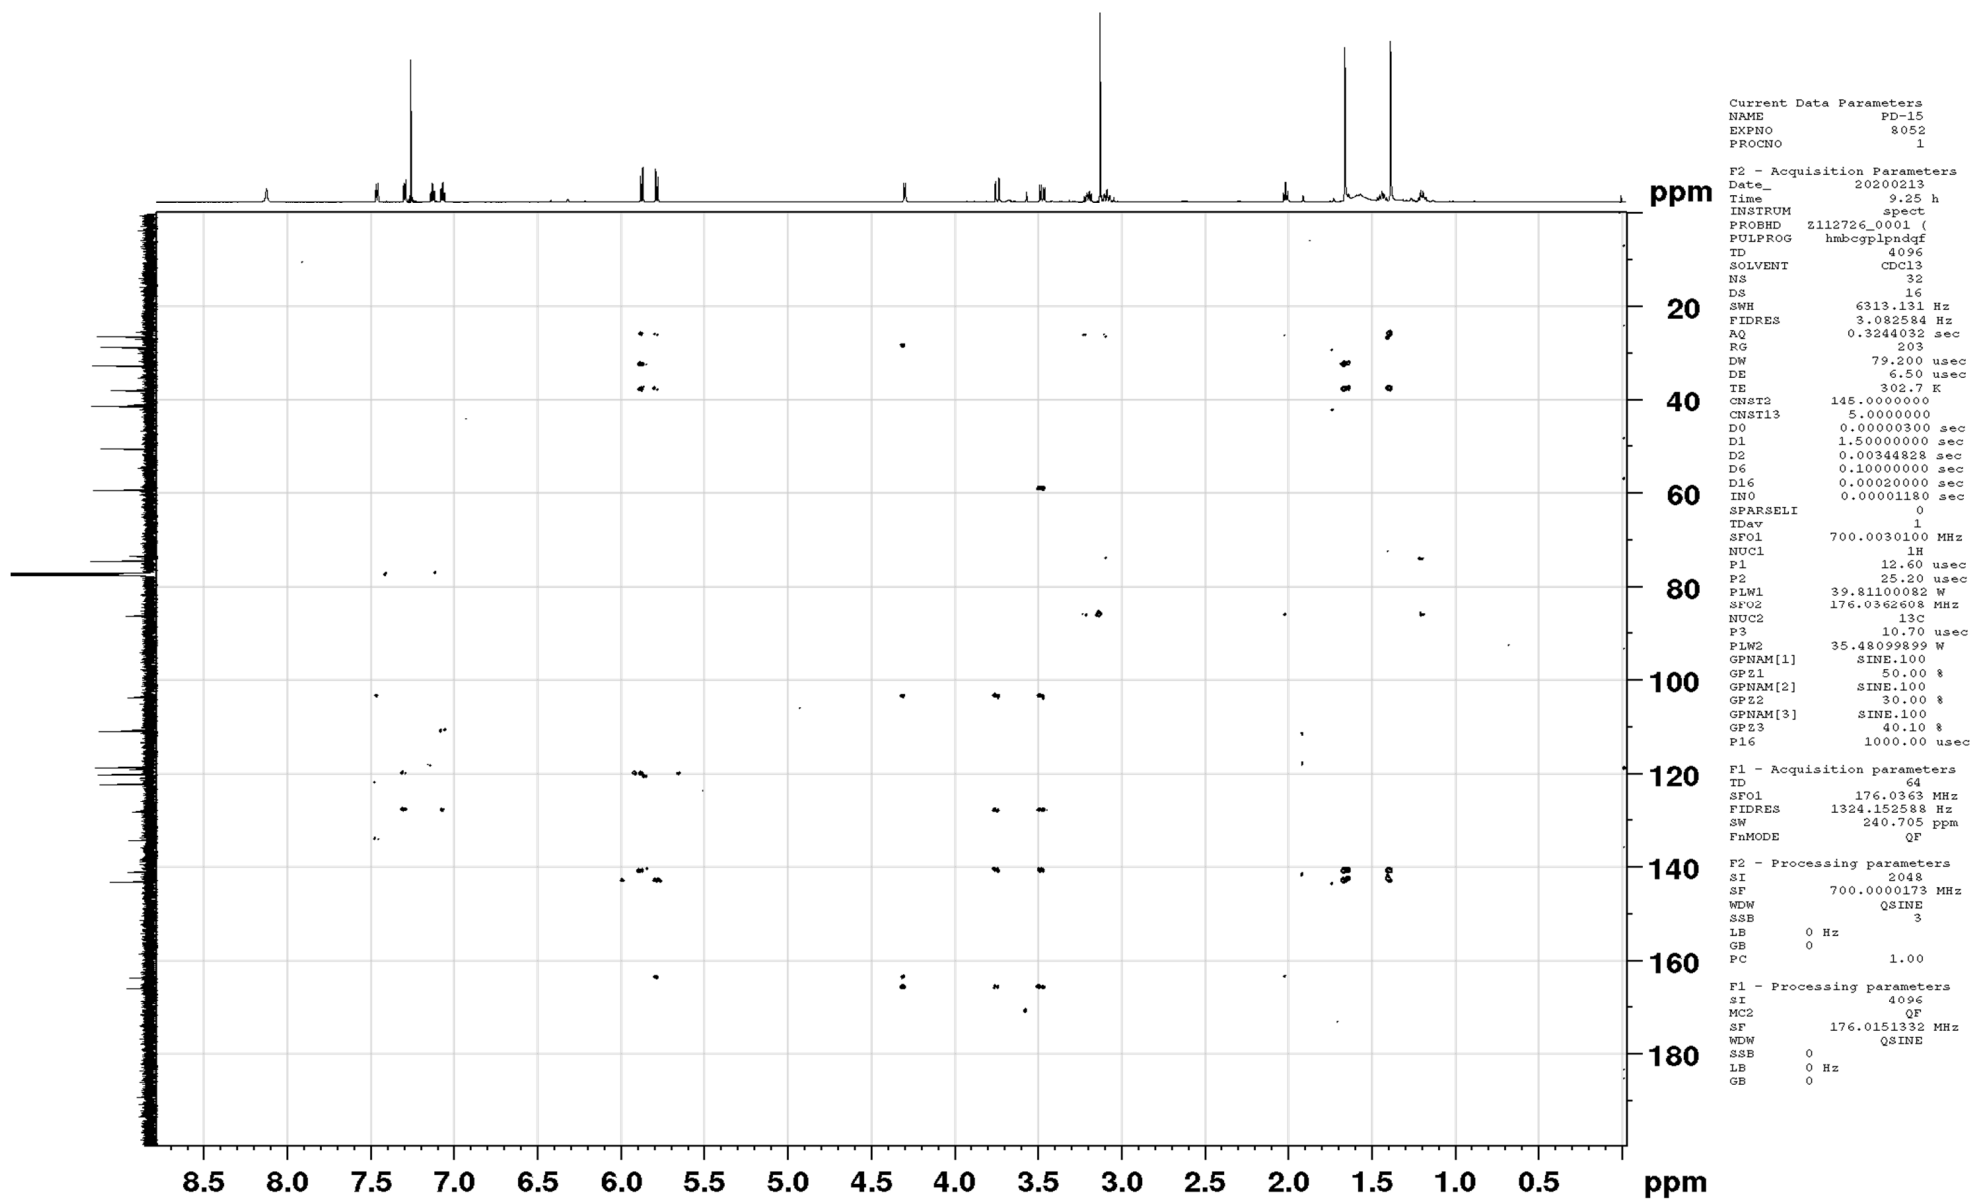

Figure S40. HMBC spectrum (700 MHz, CD<sub>3</sub>OD) of 3

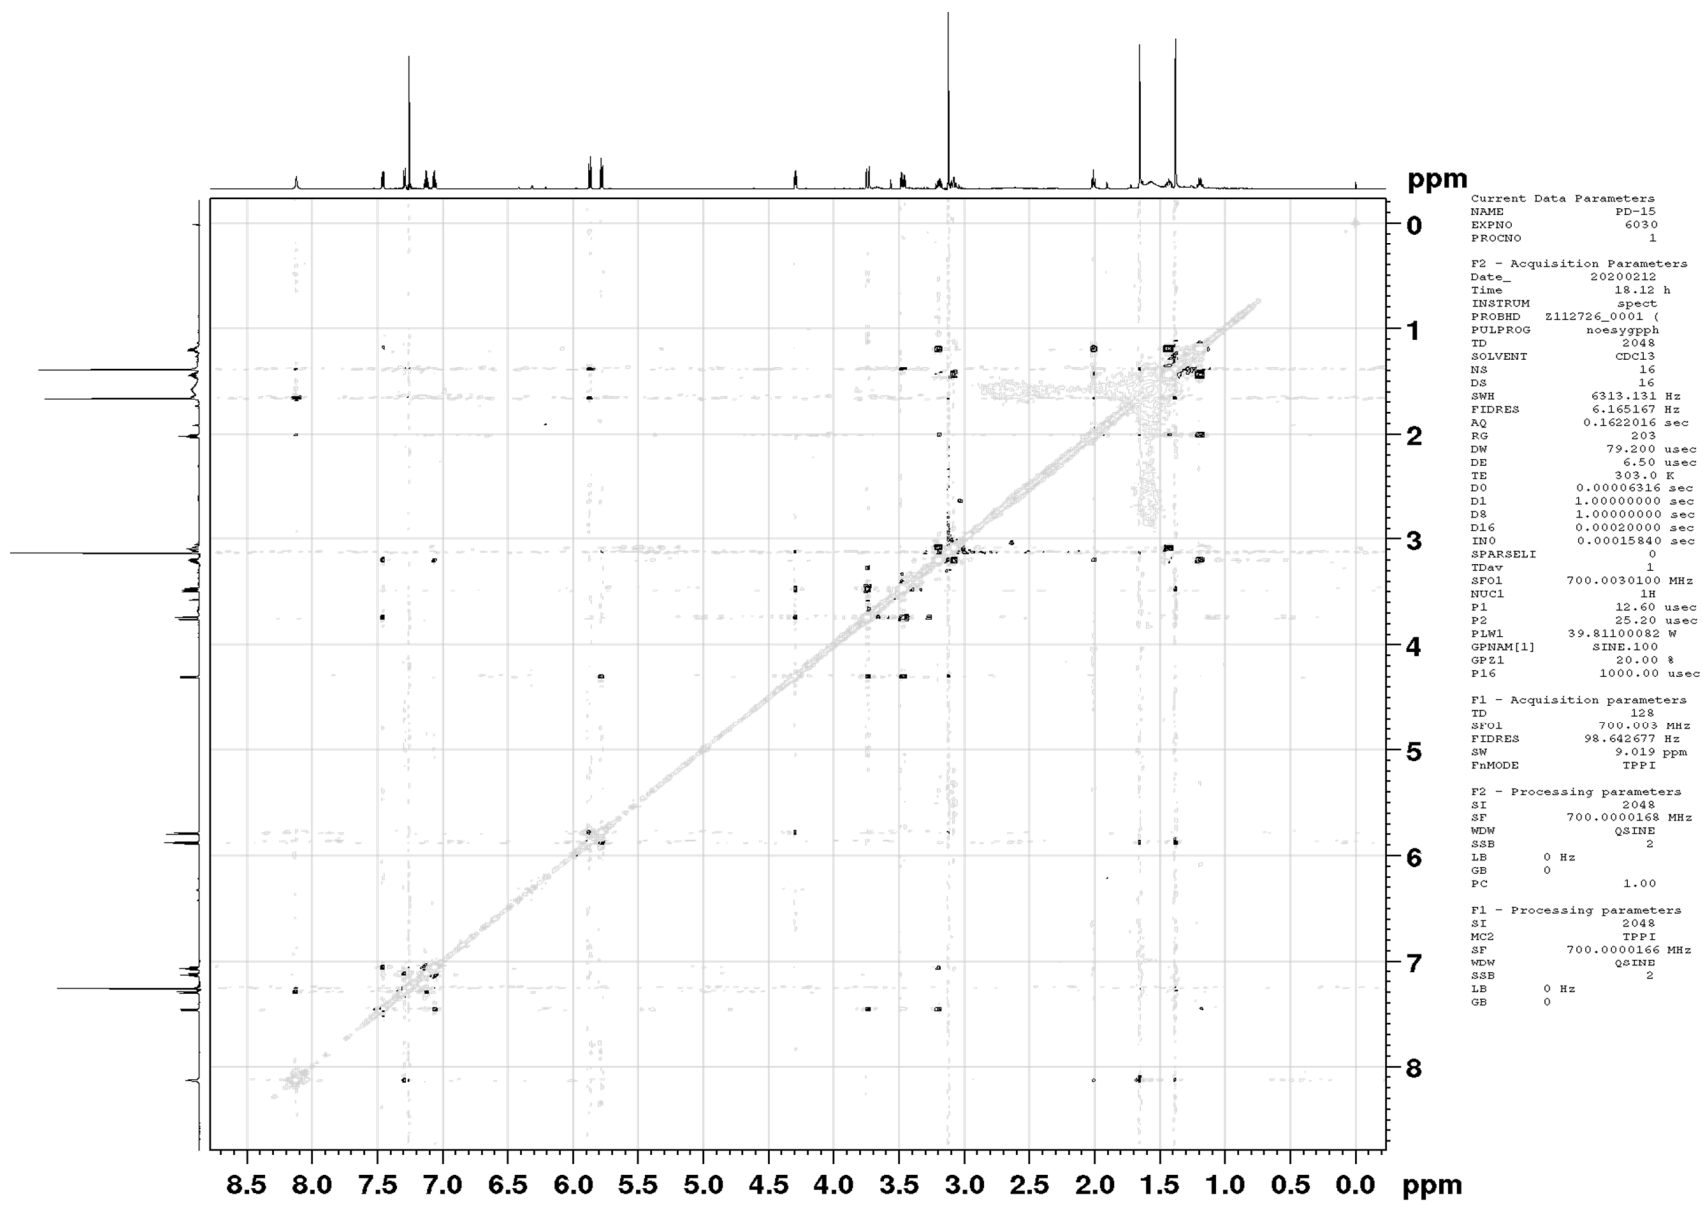

Figure S41. NOESY spectrum (700 MHz, CD<sub>3</sub>OD) of 3

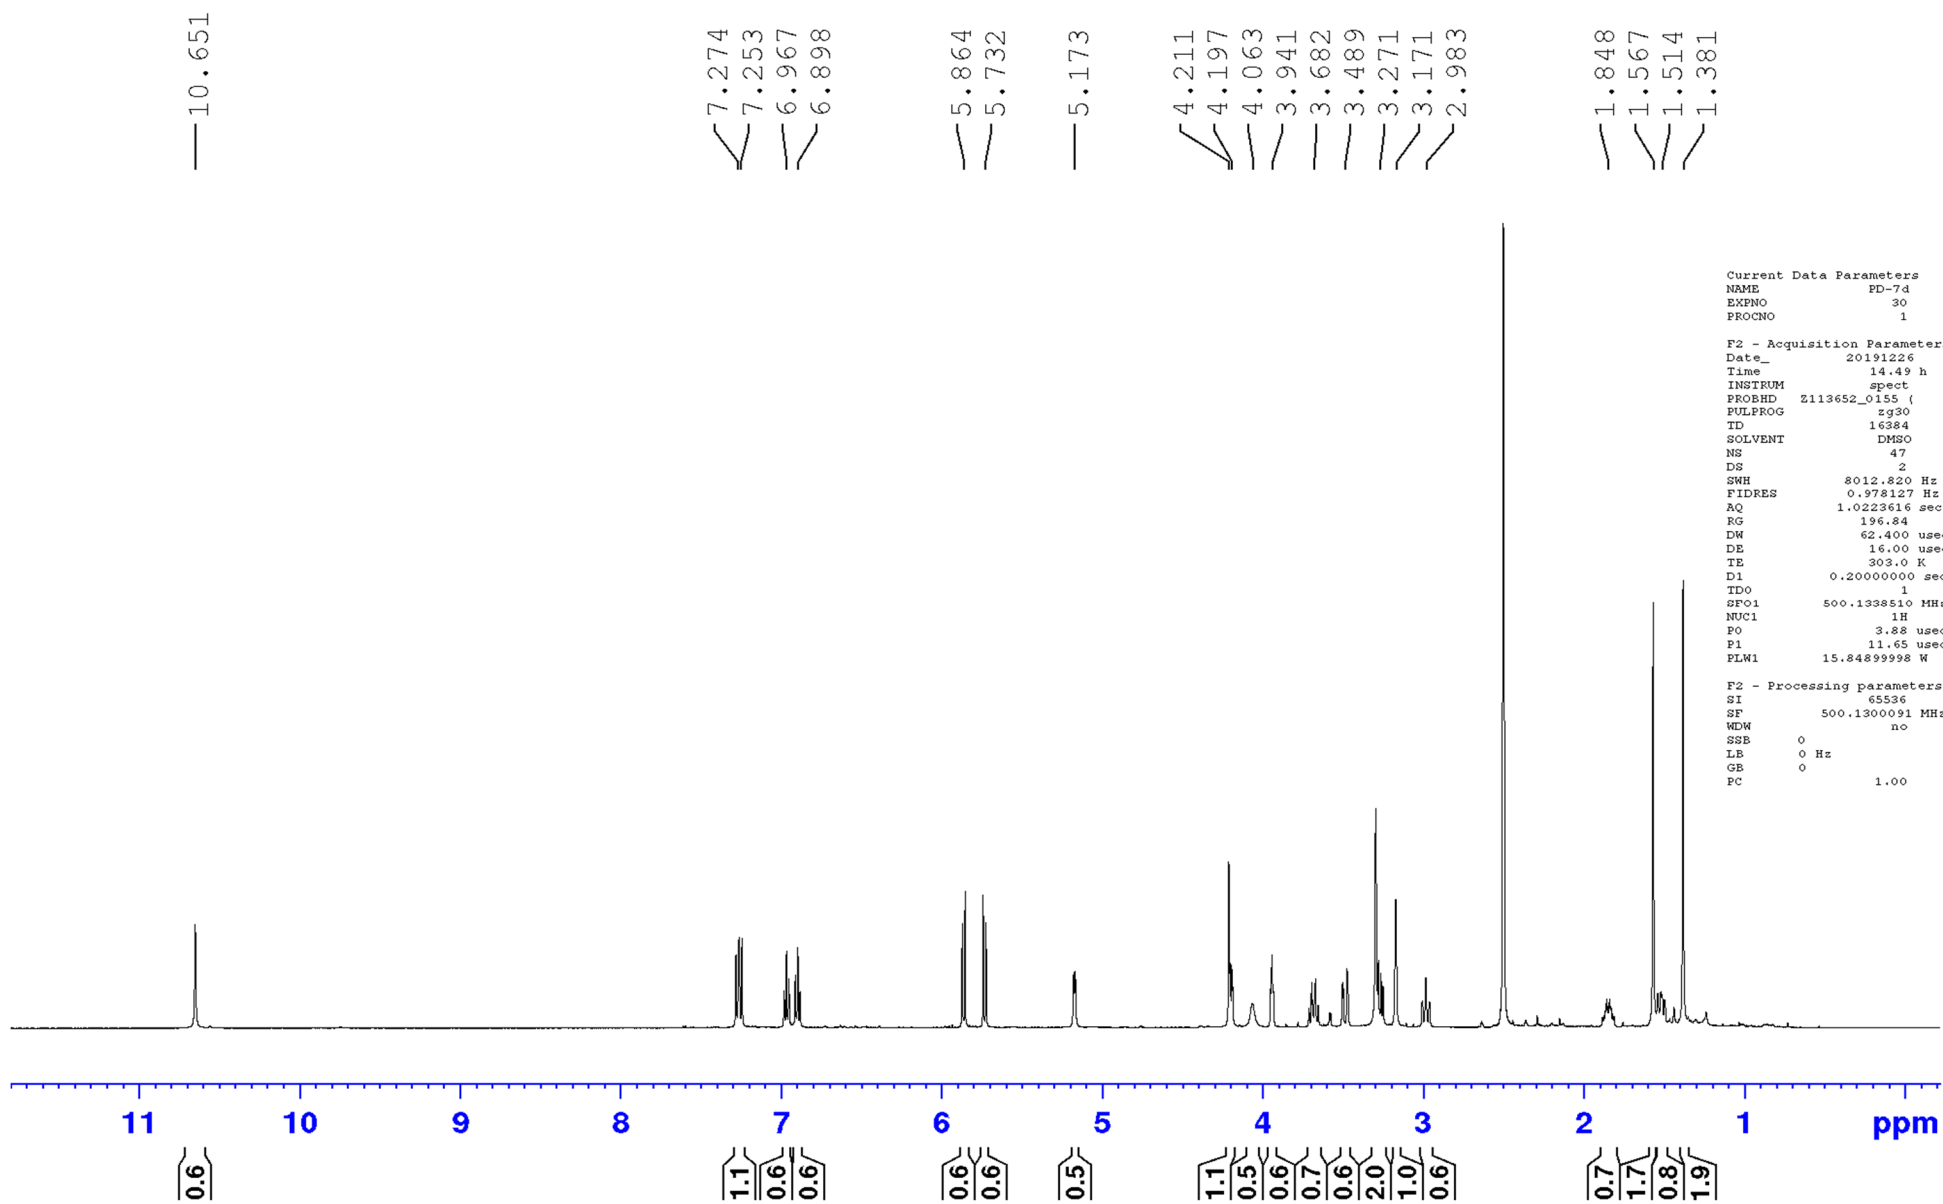

Figure S42. <sup>1</sup>H NMR spectrum (500 MHz, DMSO-d<sub>6</sub>) of 4

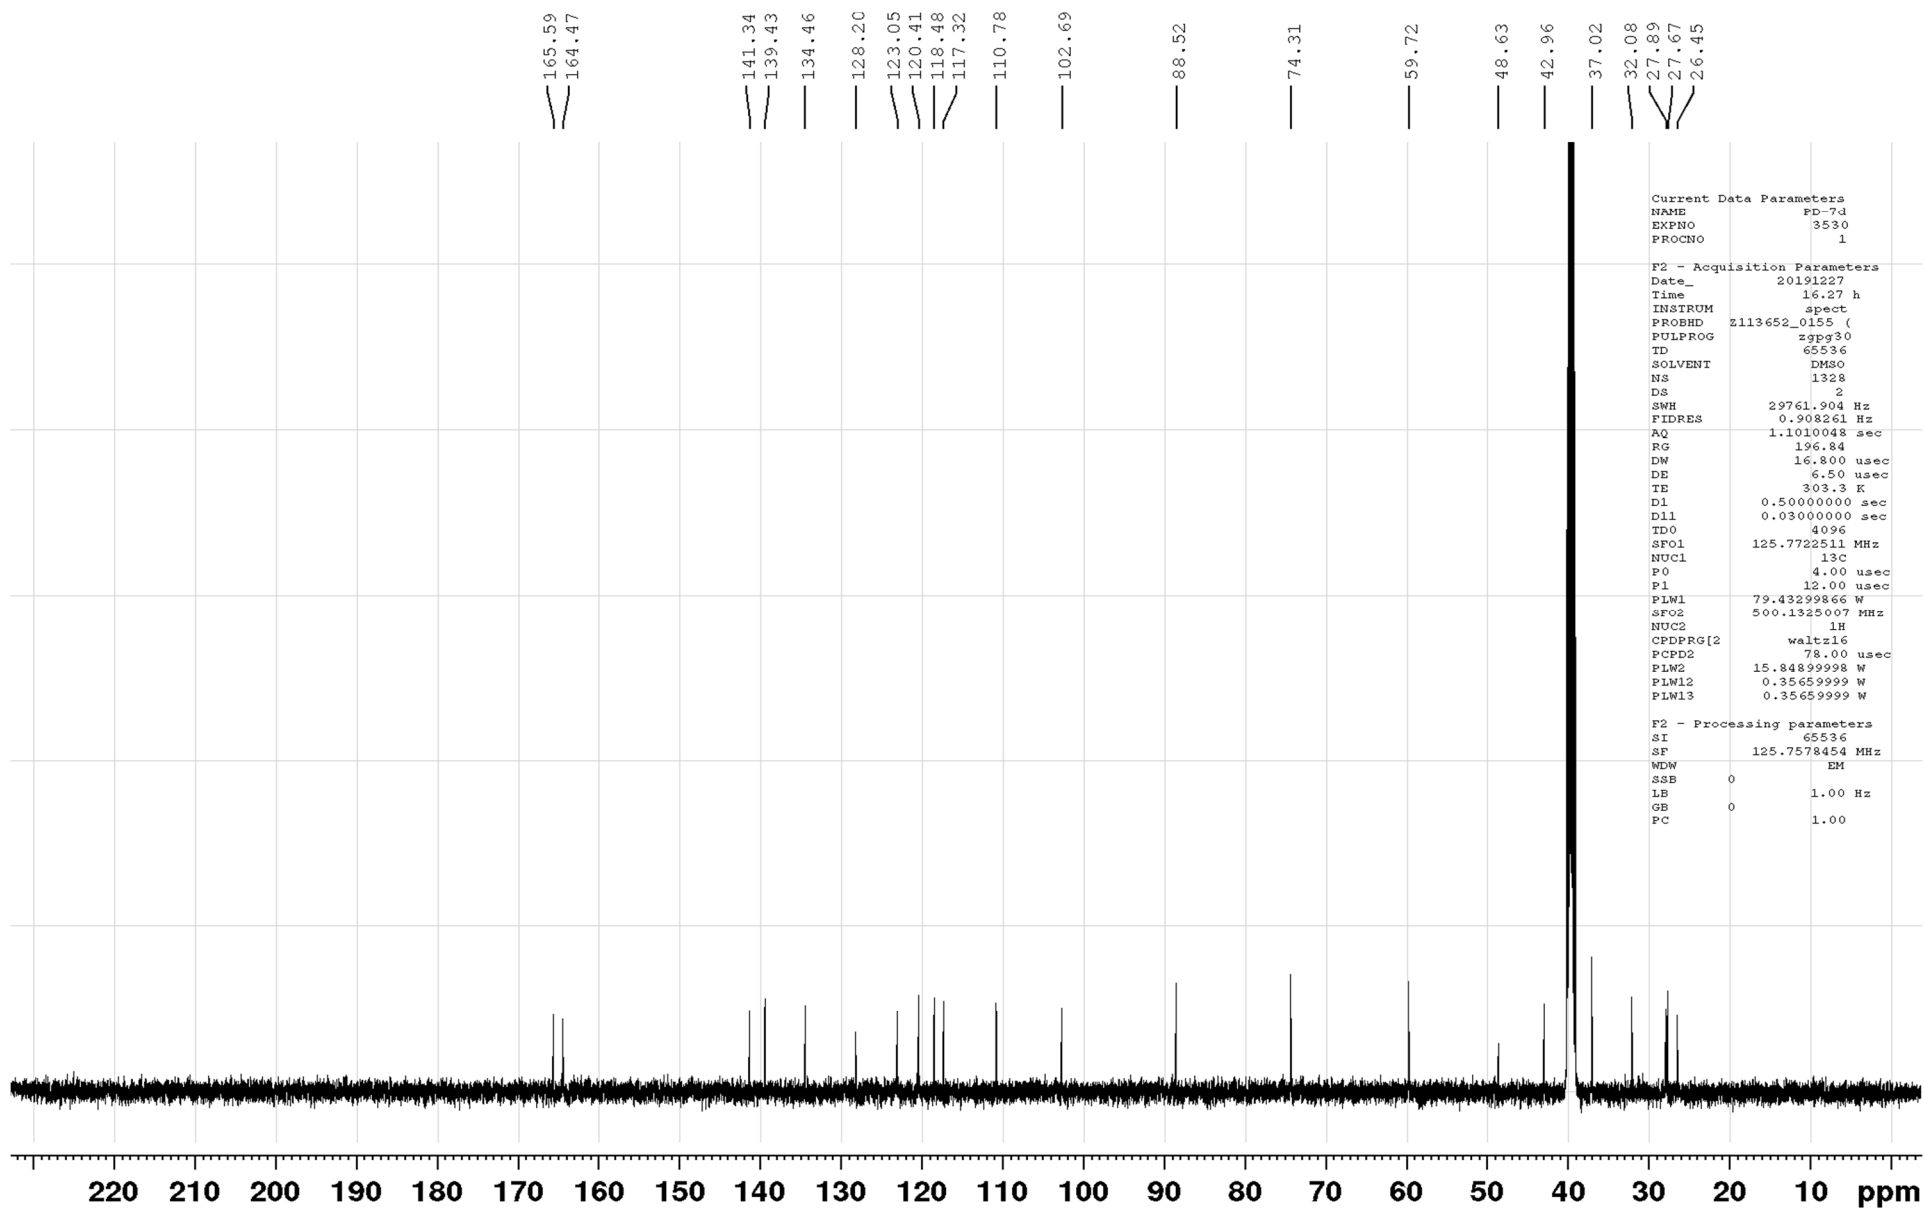

Figure S43. <sup>13</sup>C NMR spectrum (125 MHz, DMSO-d<sub>6</sub>) of 4

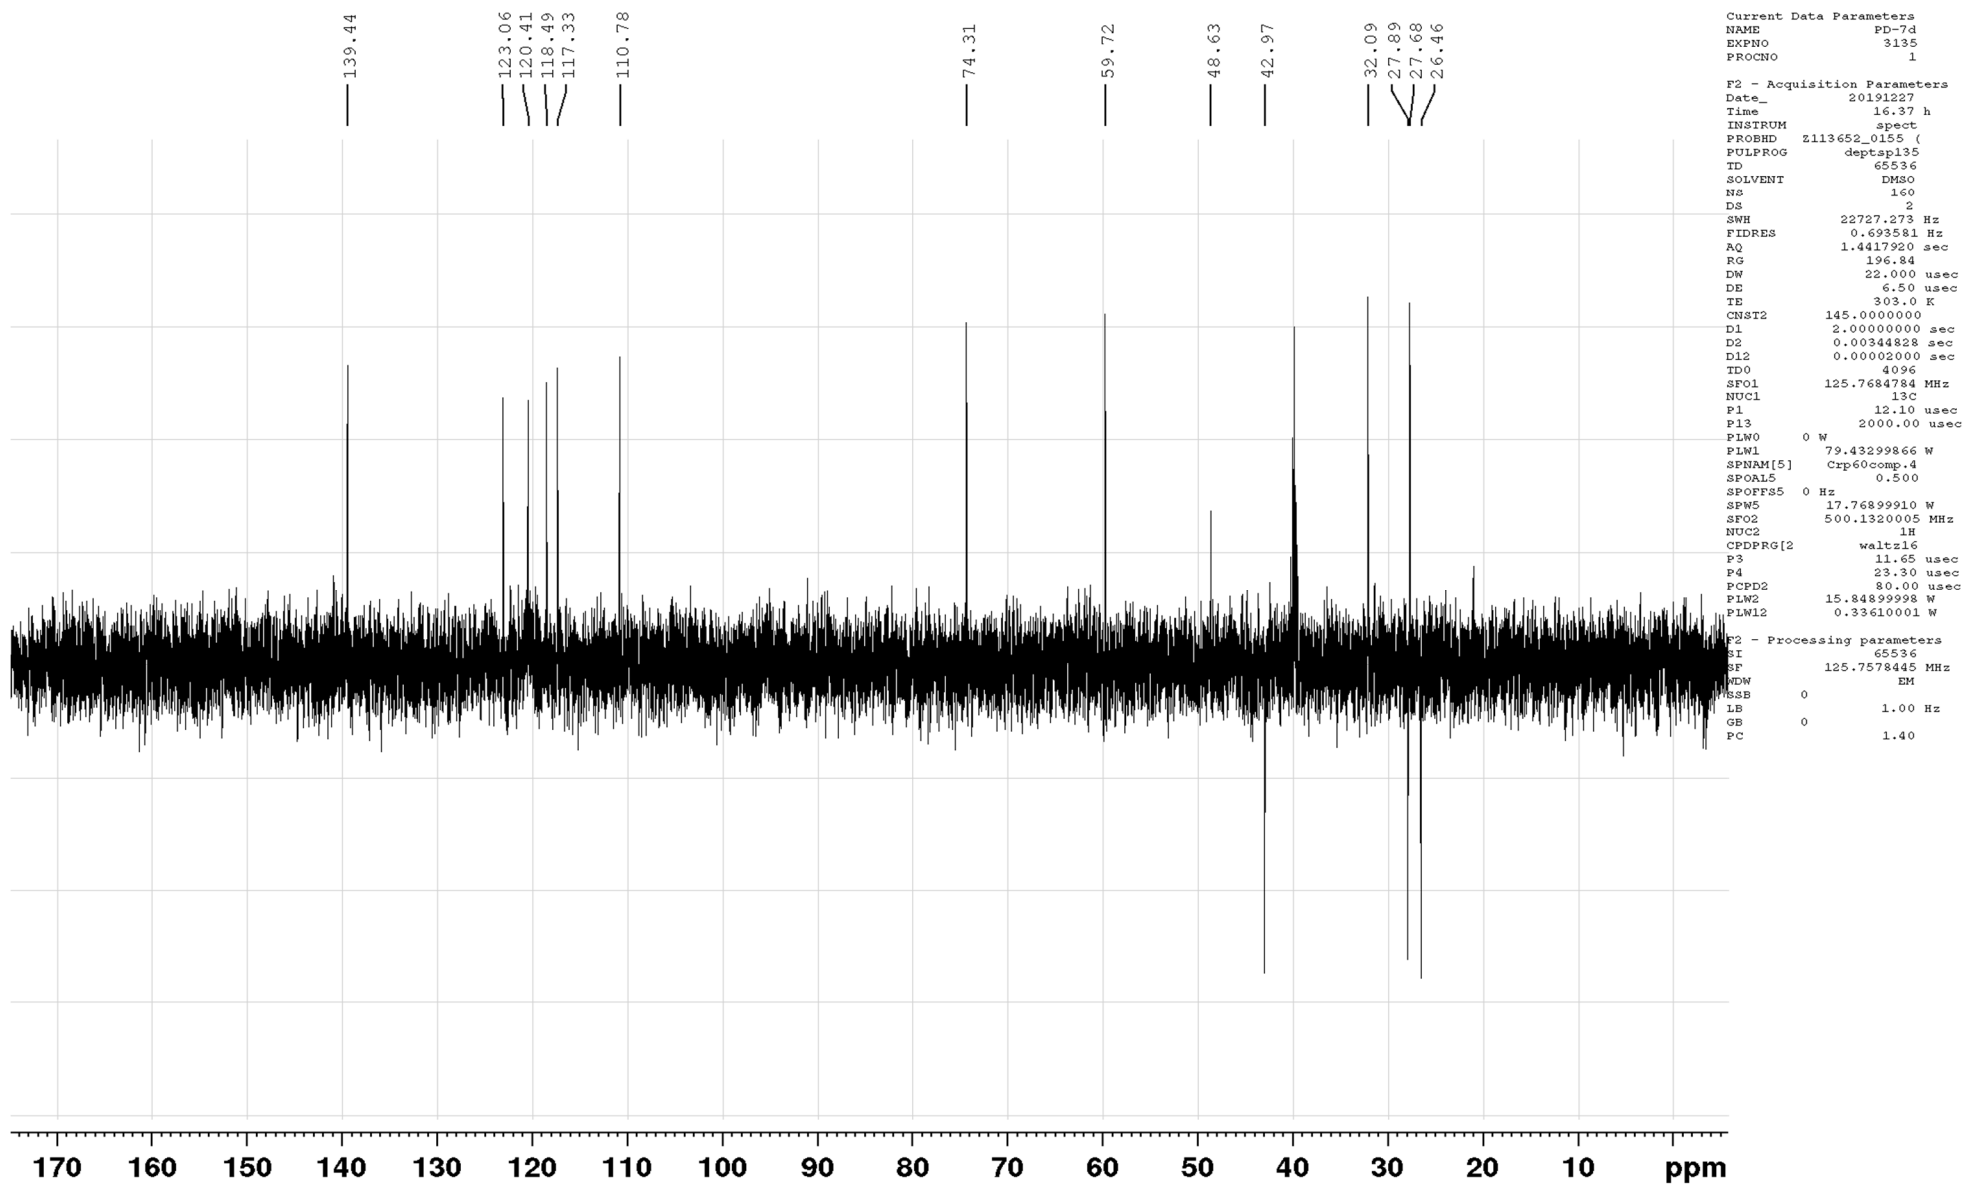

Figure S44. DEPT-135 NMR spectrum (125 MHz, DMSO-d<sub>6</sub>) of 4

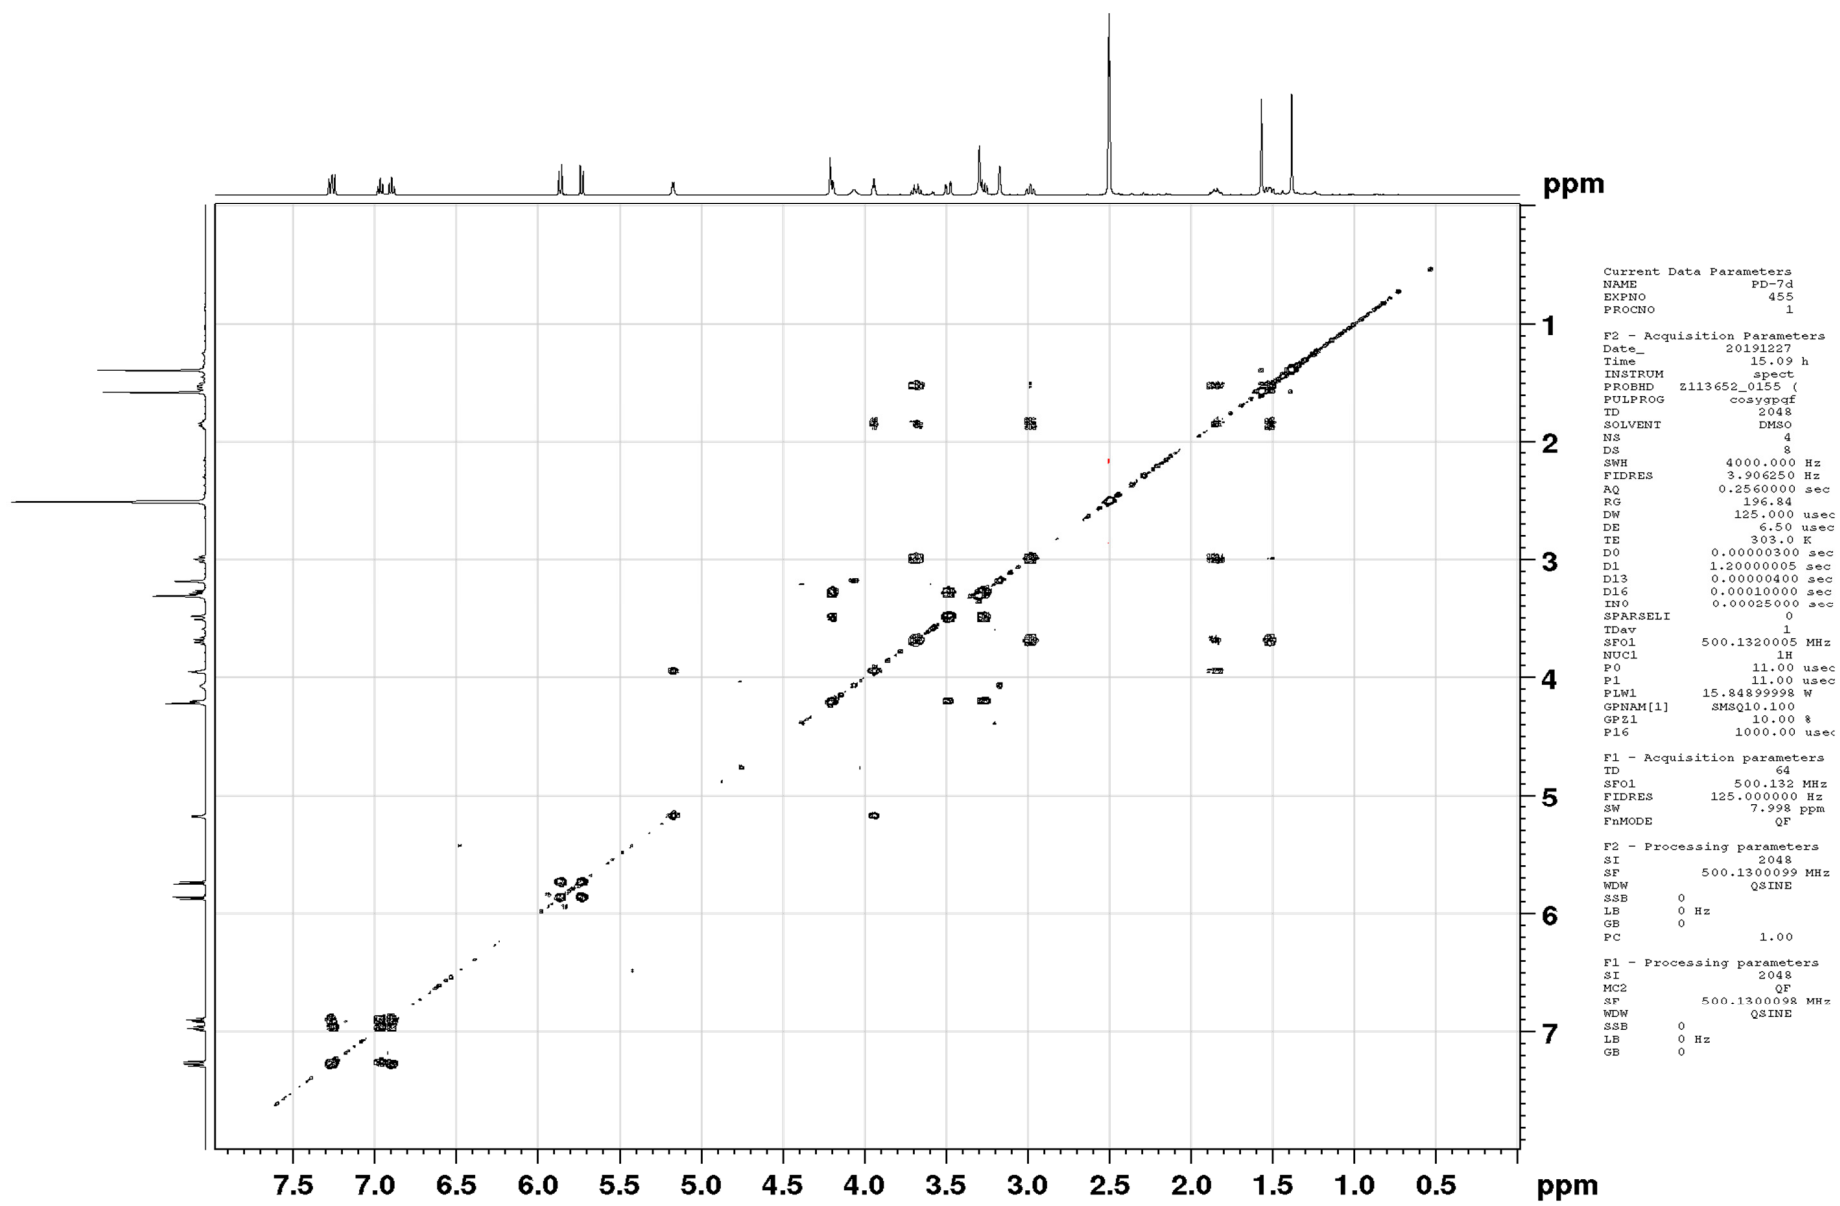

Figure S45. COSY-45 spectrum (500 MHz, DMSO-d<sub>6</sub>) of 4



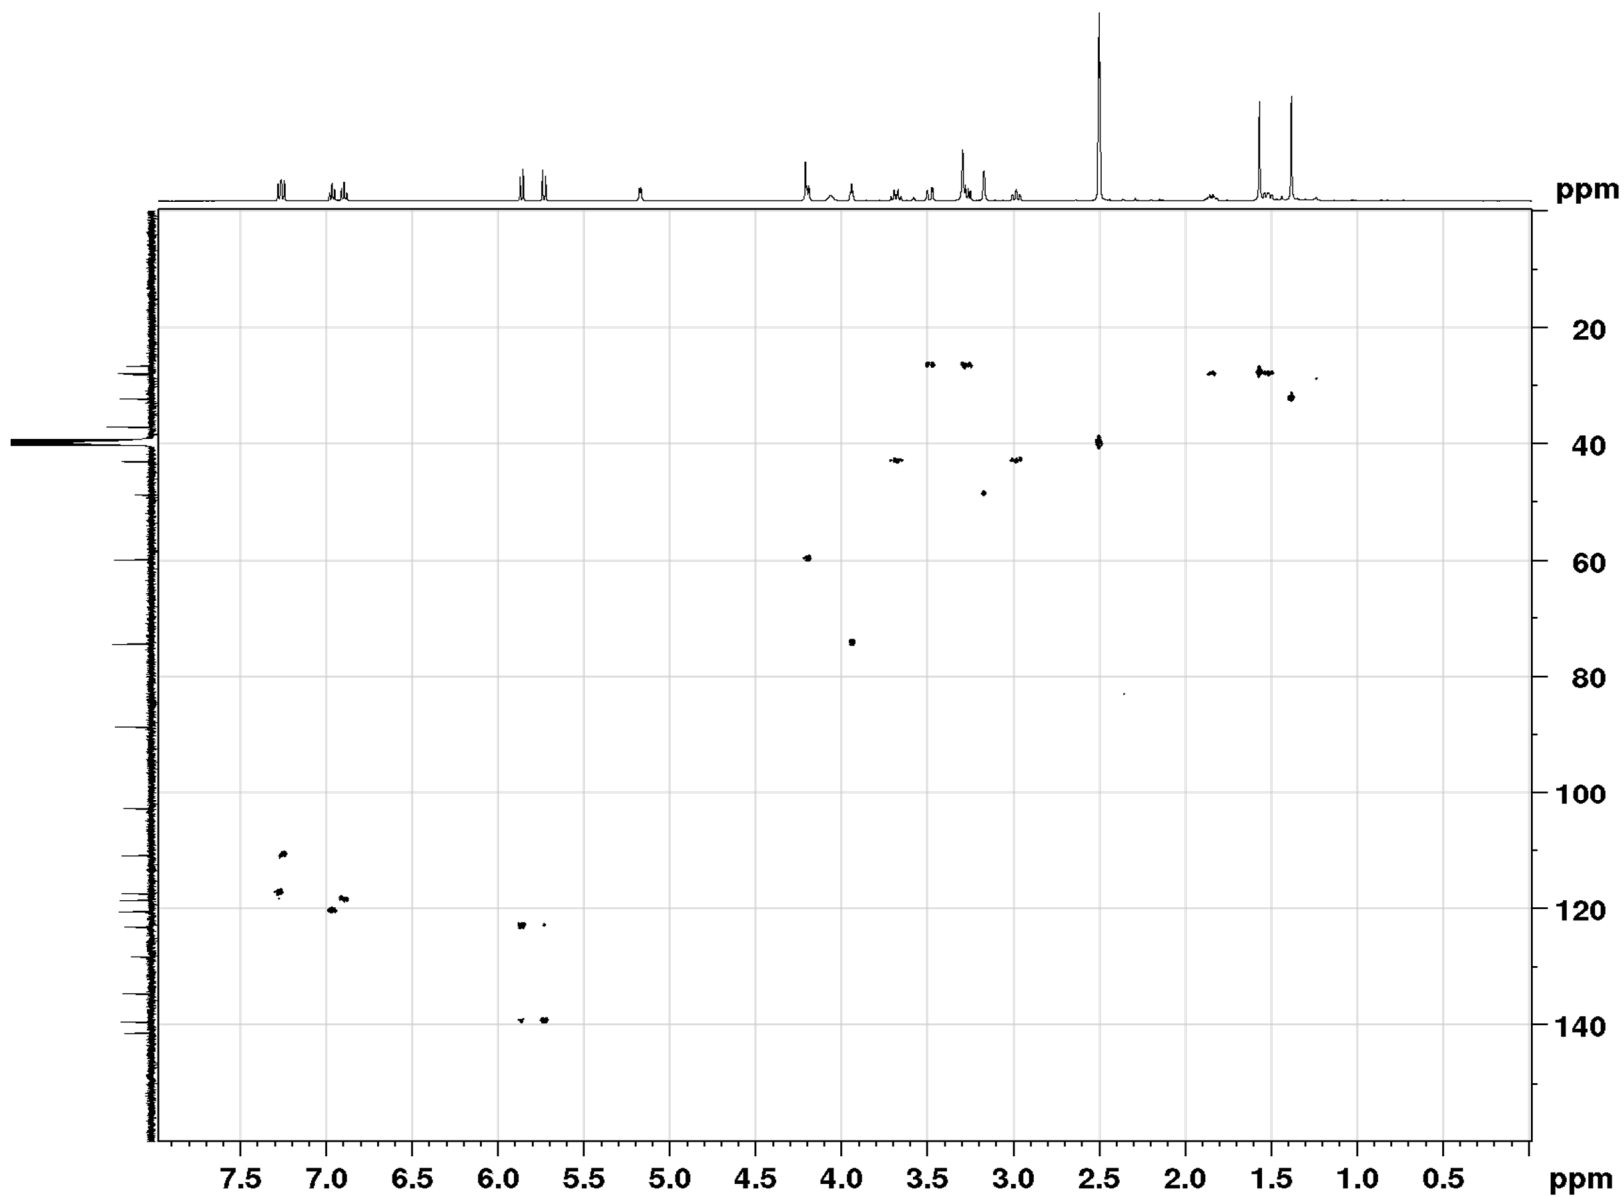

```

Current Data Parameters
NAME      PD-7d
EXPNO    7130
PROCNO    1

F2 - Acquisition Parameters
Date_    20191227
Time     15.24 h
INSTRUM  spect
PROBHD   s113652_0155 (
PULPROG  hsqcetgpsisp2.2
TD        2048
SOLVENT  DMSO
NS        4
DS        16
SWH       4000.000 Hz
FIDRES    3.906250 Hz
AQ        0.2560000 sec
RG        196.84
AQ        125.000 usec
DE        6.50 usec
TE        303.2 K
CNST2    145.0000000
CNST17   -0.5000000
DO        0.0000000 sec
D1        1.20000003 sec
D4        0.00172414 sec
D11       0.03000000 sec
D16       0.00010000 sec
D24       0.00089000 sec
INO       0.00002480 sec
SPARSELI  0
TD0ev     1
SFO1      500.1320005 MHz
NUC1      13C
P1        11.00 usec
P2        22.00 usec
P28       0 usec
PLM1      15.84899994 W
SFO2      125.7678496 MHz
NUC2      13C
CFDPRG[2] bi_p3m4sp_4sp.2
P3        15.50 usec
P14       500.00 usec
P24       2000.00 usec
P63       1500.00 usec
PLM0      0 W
PLM2      79.43299866 W
ELM12     2.74029994 W
SPNAM[3]  Crp60,0.5,20.1
SFOAL3    0 Hz
SPOFFS3   0 Hz
SFW3      18.96299934 W
SPNAM[7]  Crp60comp.4
SFOAL7    0 Hz
SPOFFS7   0 Hz
SFW7      18.96299934 W
SPNAM[14] Crp32,1.5,20.2
SFOAL14   0 Hz
SPOFFS14  0 Hz
SFW14     8.09099960 W
SPNAM[31] Crp32,1.5,20.2
SFOAL31   0 Hz
SPOFFS31  0 Hz
SFW31     2.02270007 W
GPNAM[1]  SMSQ10.100
GPE1      80.00 %
GPNAM[2]  SMSQ10.100
GPE2      20.10 %
GPNAM[3]  SMSQ10.100
GPE3      11.00 %
GPNAM[4]  SMSQ10.100
GPE4      -5.00 %
P16       1000.00 usec
P19       600.00 usec

F1 - Acquisition parameters
TD        64
SFO1      125.7678 MHz
FIDRES    630.040344 Hz
SH        160.306 ppm
FAMODE    Echo-Antiecho

F2 - Processing parameters
SI        2048
SF        500.1300100 MHz
WDW       QSINE
SSB       3
LB        0 Hz
GB        0
PC        1.00

F1 - Processing parameters
SI        4096
MC2       echo-antiecho
SF        125.7578465 MHz
WDW       QSINE
SSB       6
LB        0 Hz
GB        0

```

Figure S46. HSQC spectrum (500 MHz, DMSO-d<sub>6</sub>) of 4

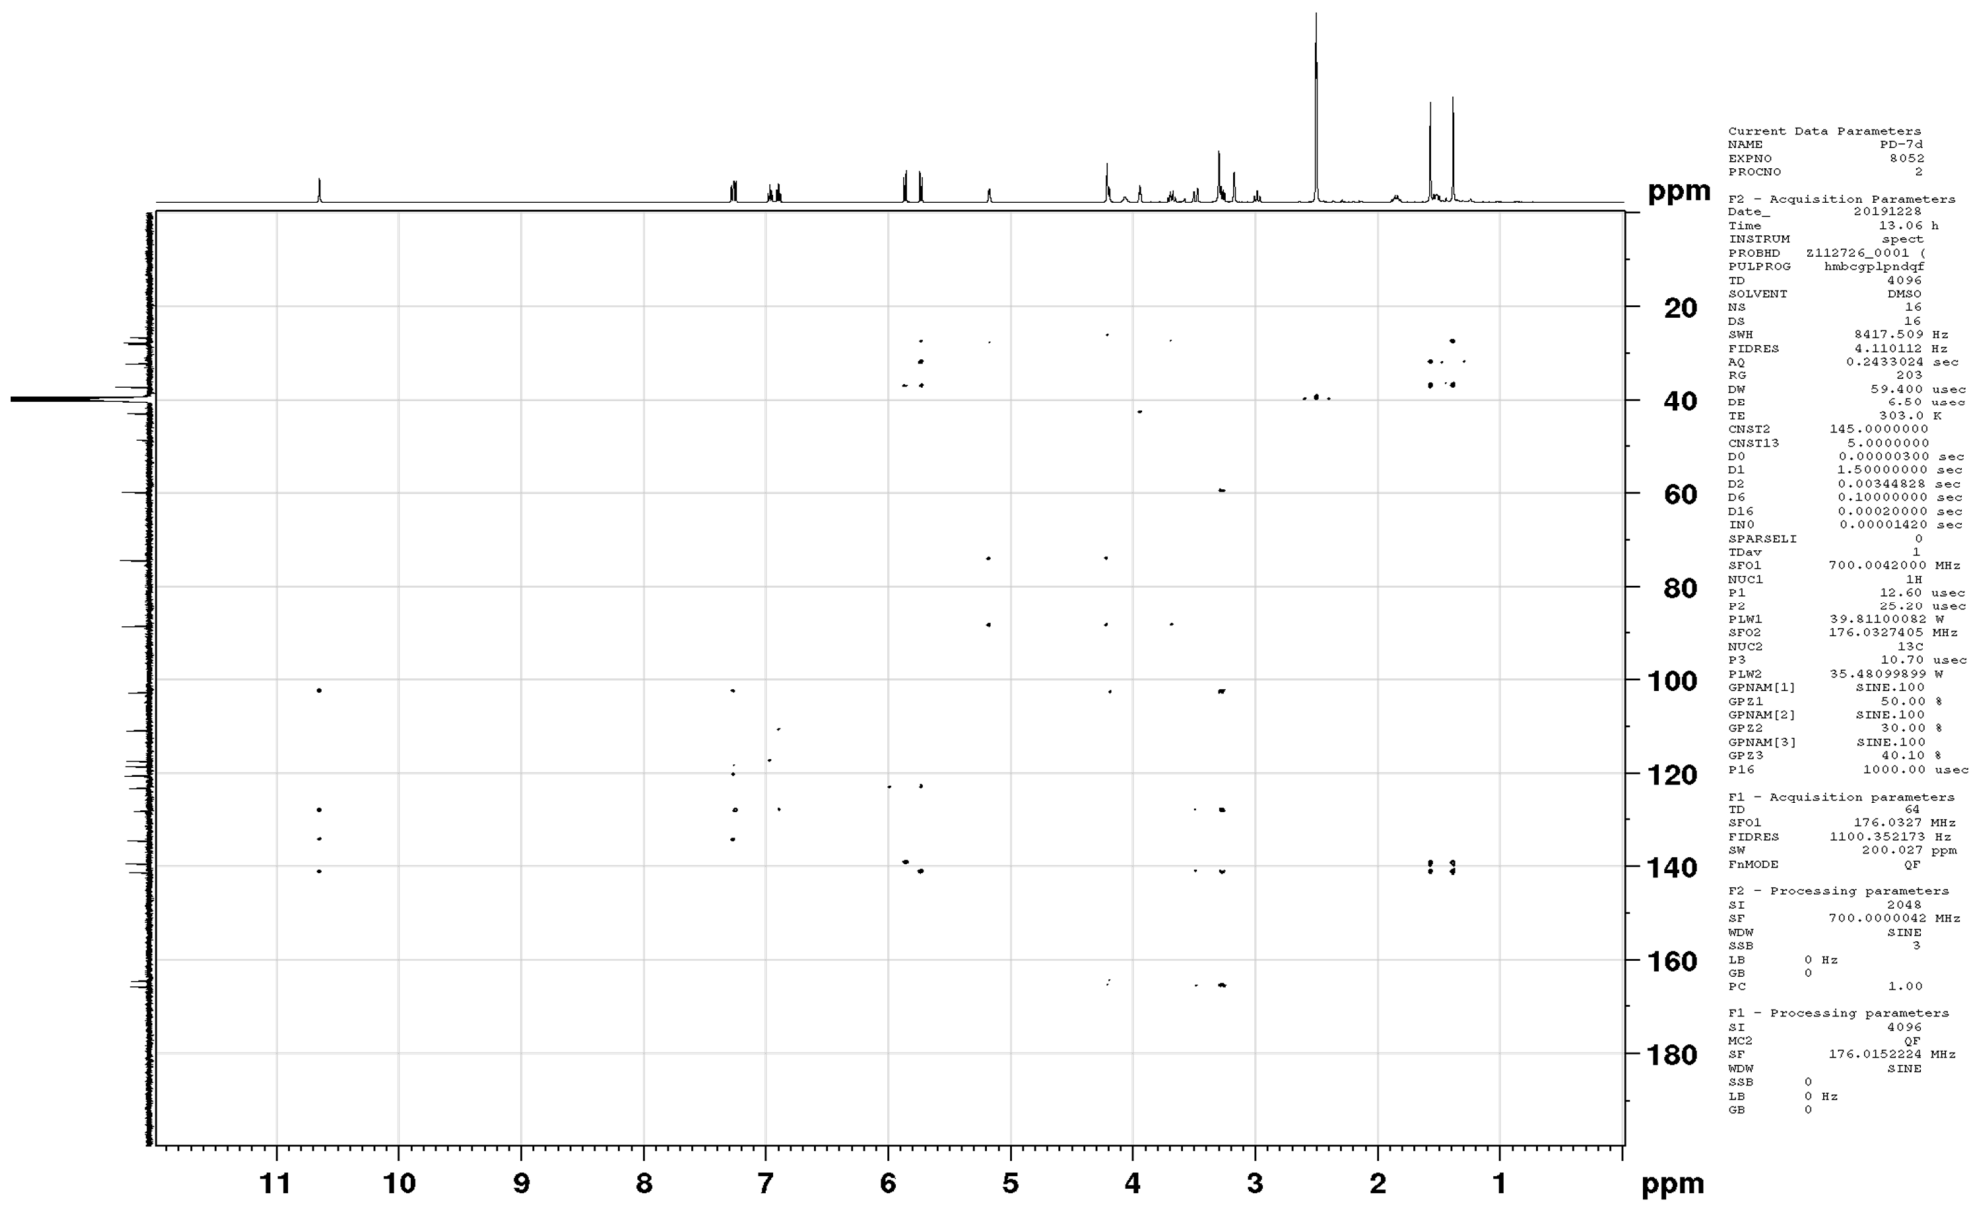

Figure S47.  $^1\text{H}$ - $^{13}\text{C}$  HMBC spectrum (700 MHz, DMSO- $d_6$ ) of 4

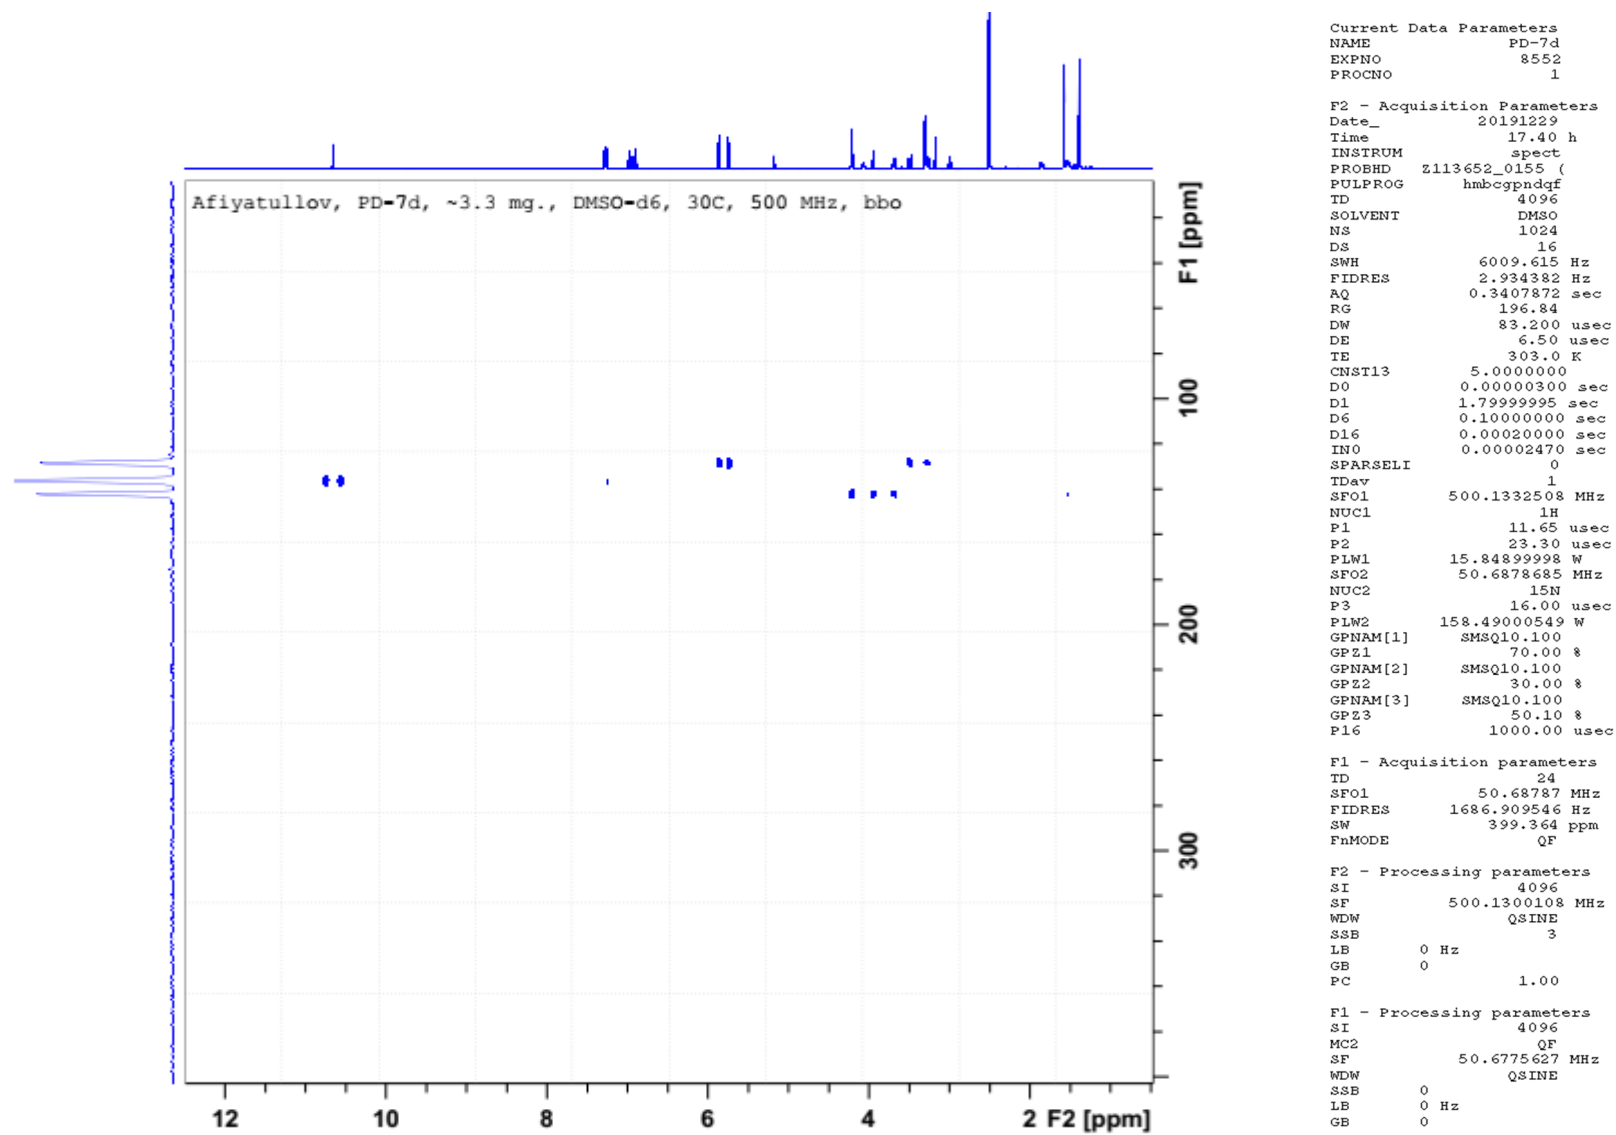

Figure S48. <sup>1</sup>H-<sup>15</sup>N GHMBC spectrum (50 MHz, DMSO-d<sub>6</sub>) of 4

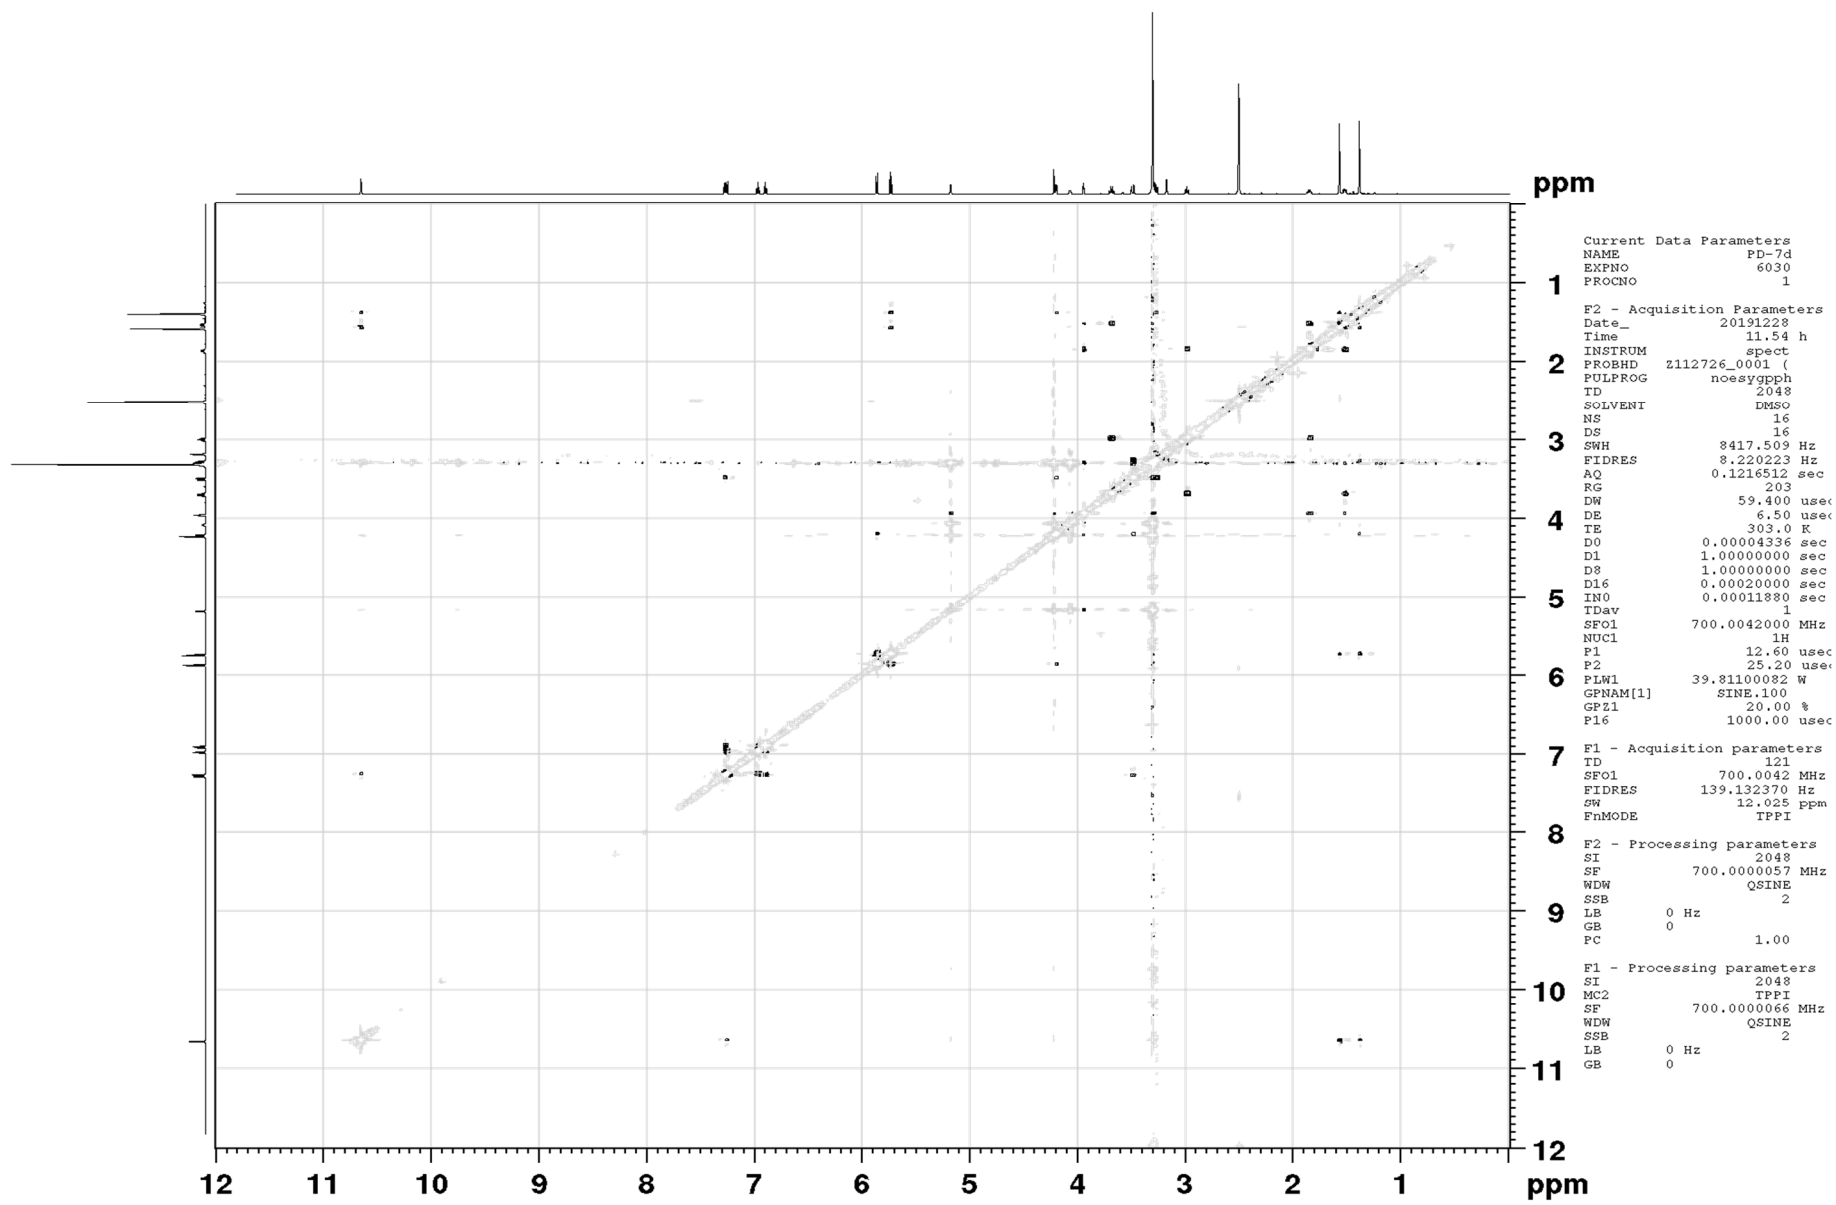

Figure S49. NOESY spectrum (700 MHz, DMSO-d<sub>6</sub>) of 4

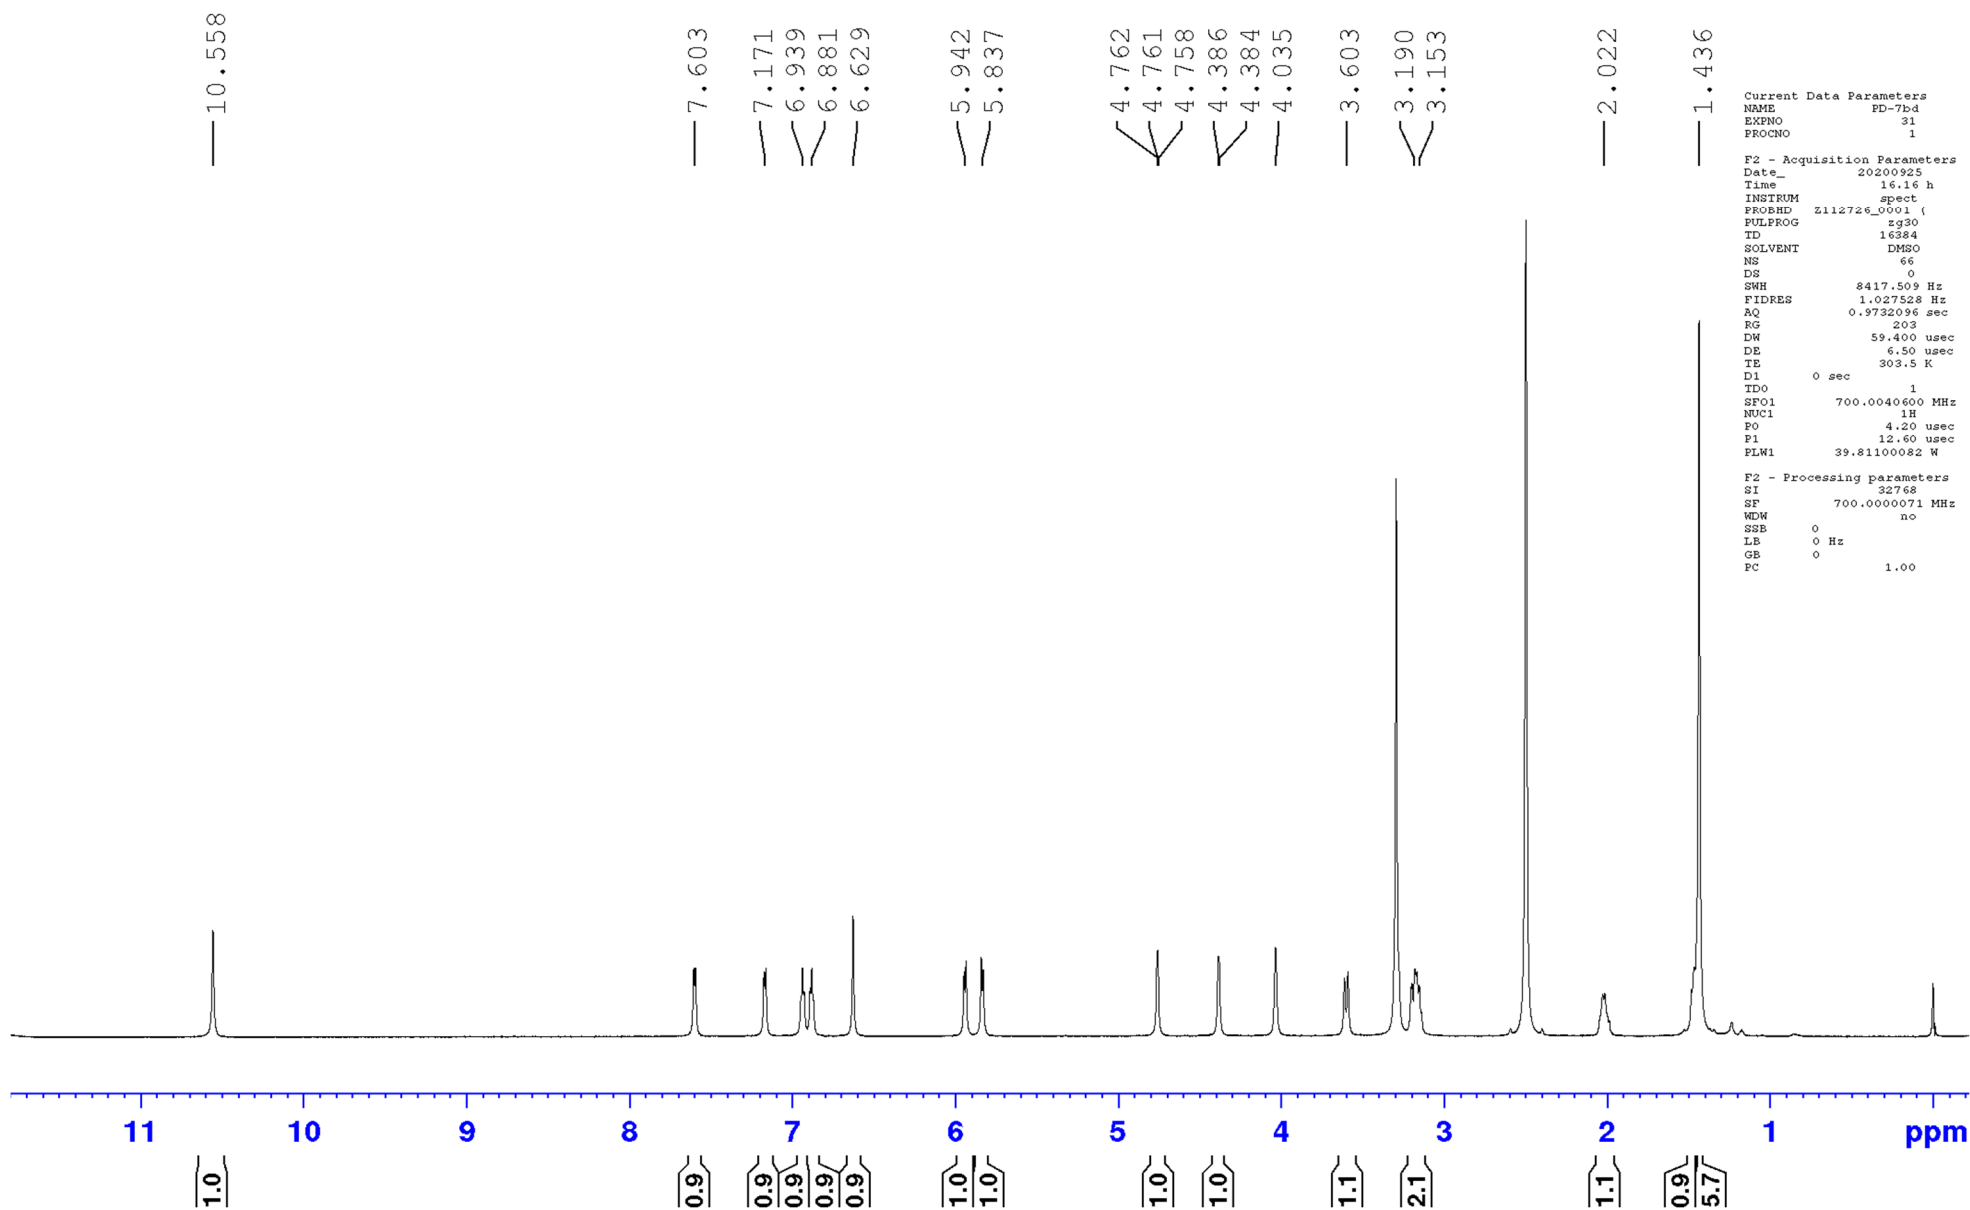

Figure S50. <sup>1</sup>H NMR spectrum (700 MHz, DMSO-d<sub>6</sub>) of 5

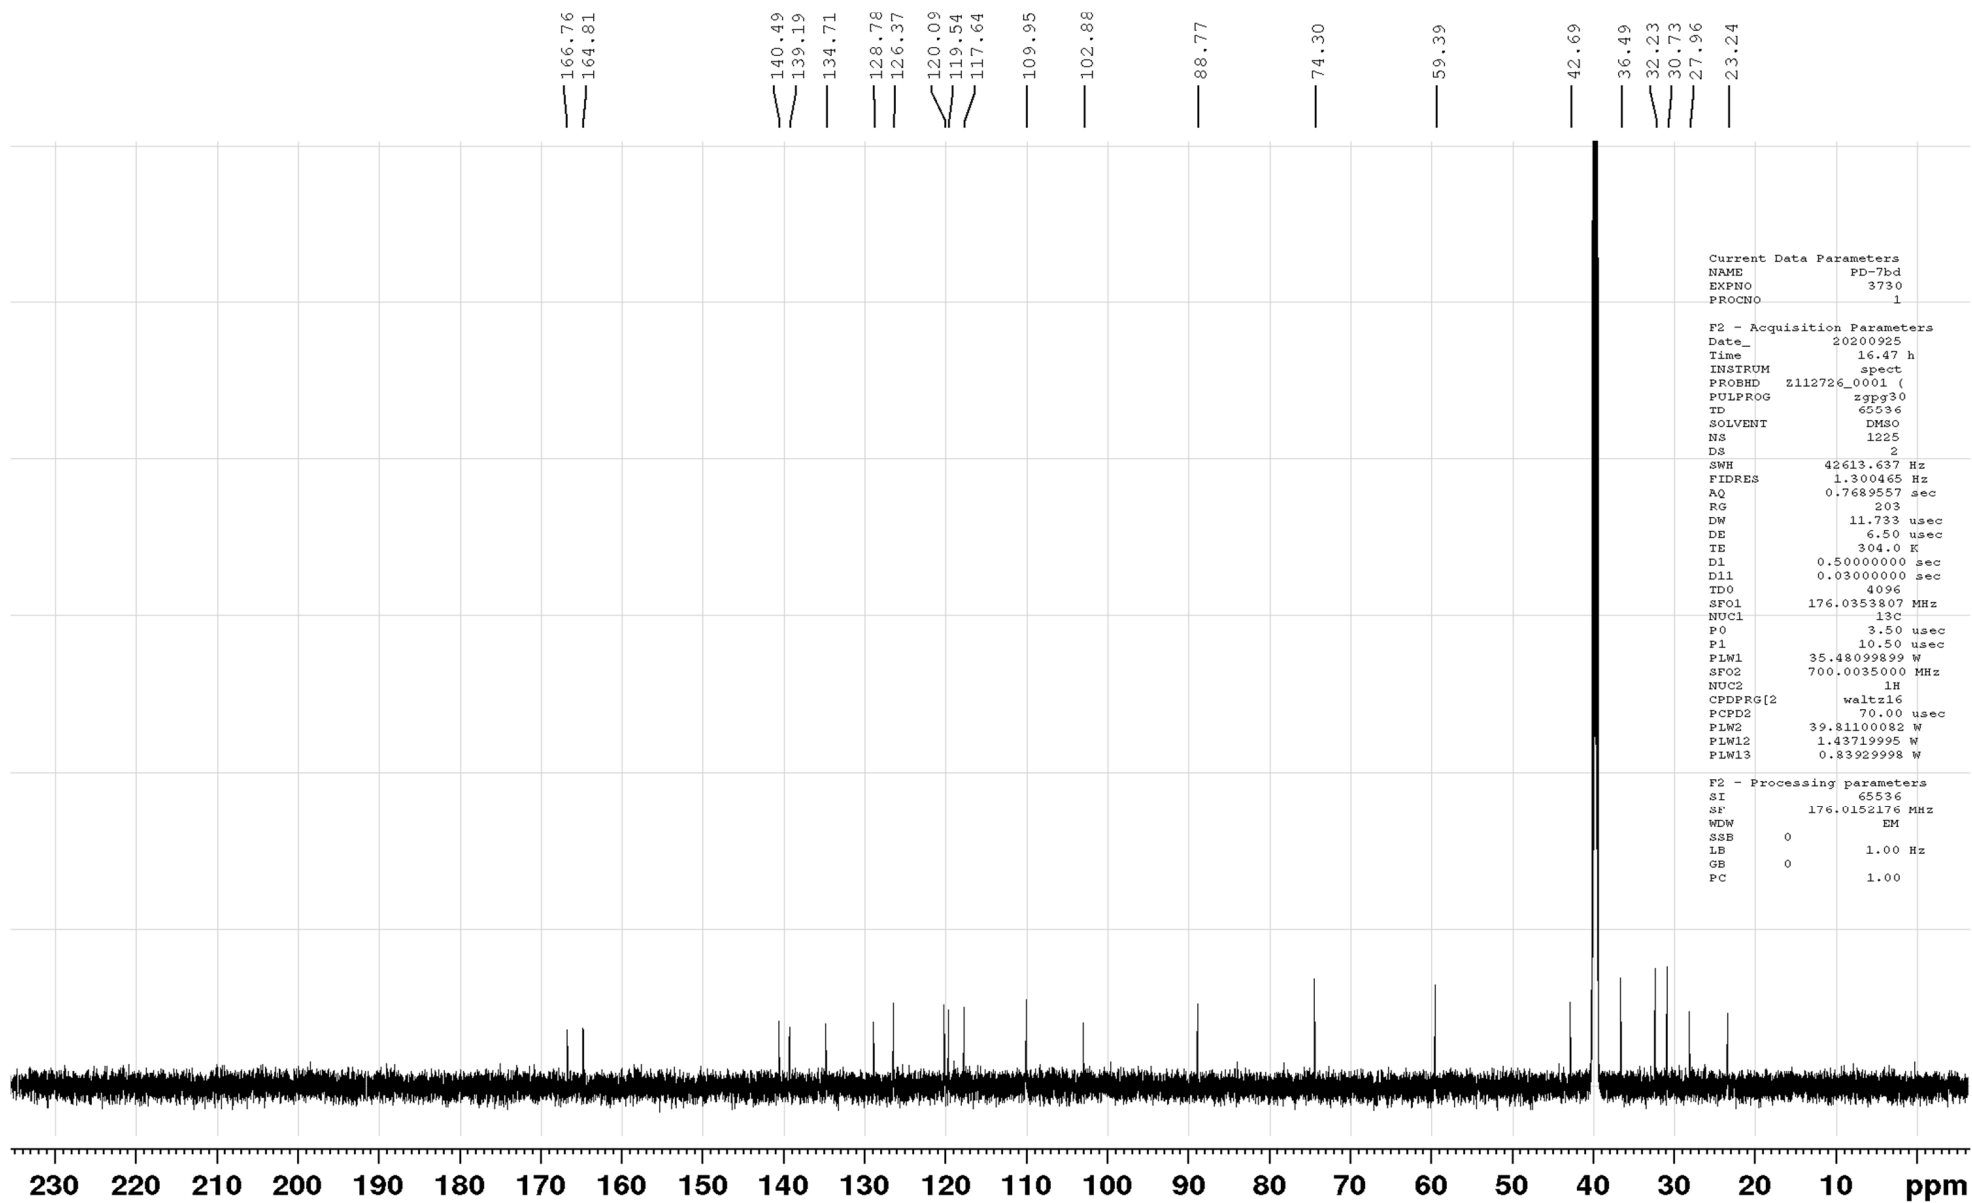

Figure S51. <sup>13</sup>C NMR spectrum (176 MHz, DMSO-d<sub>6</sub>) of 5

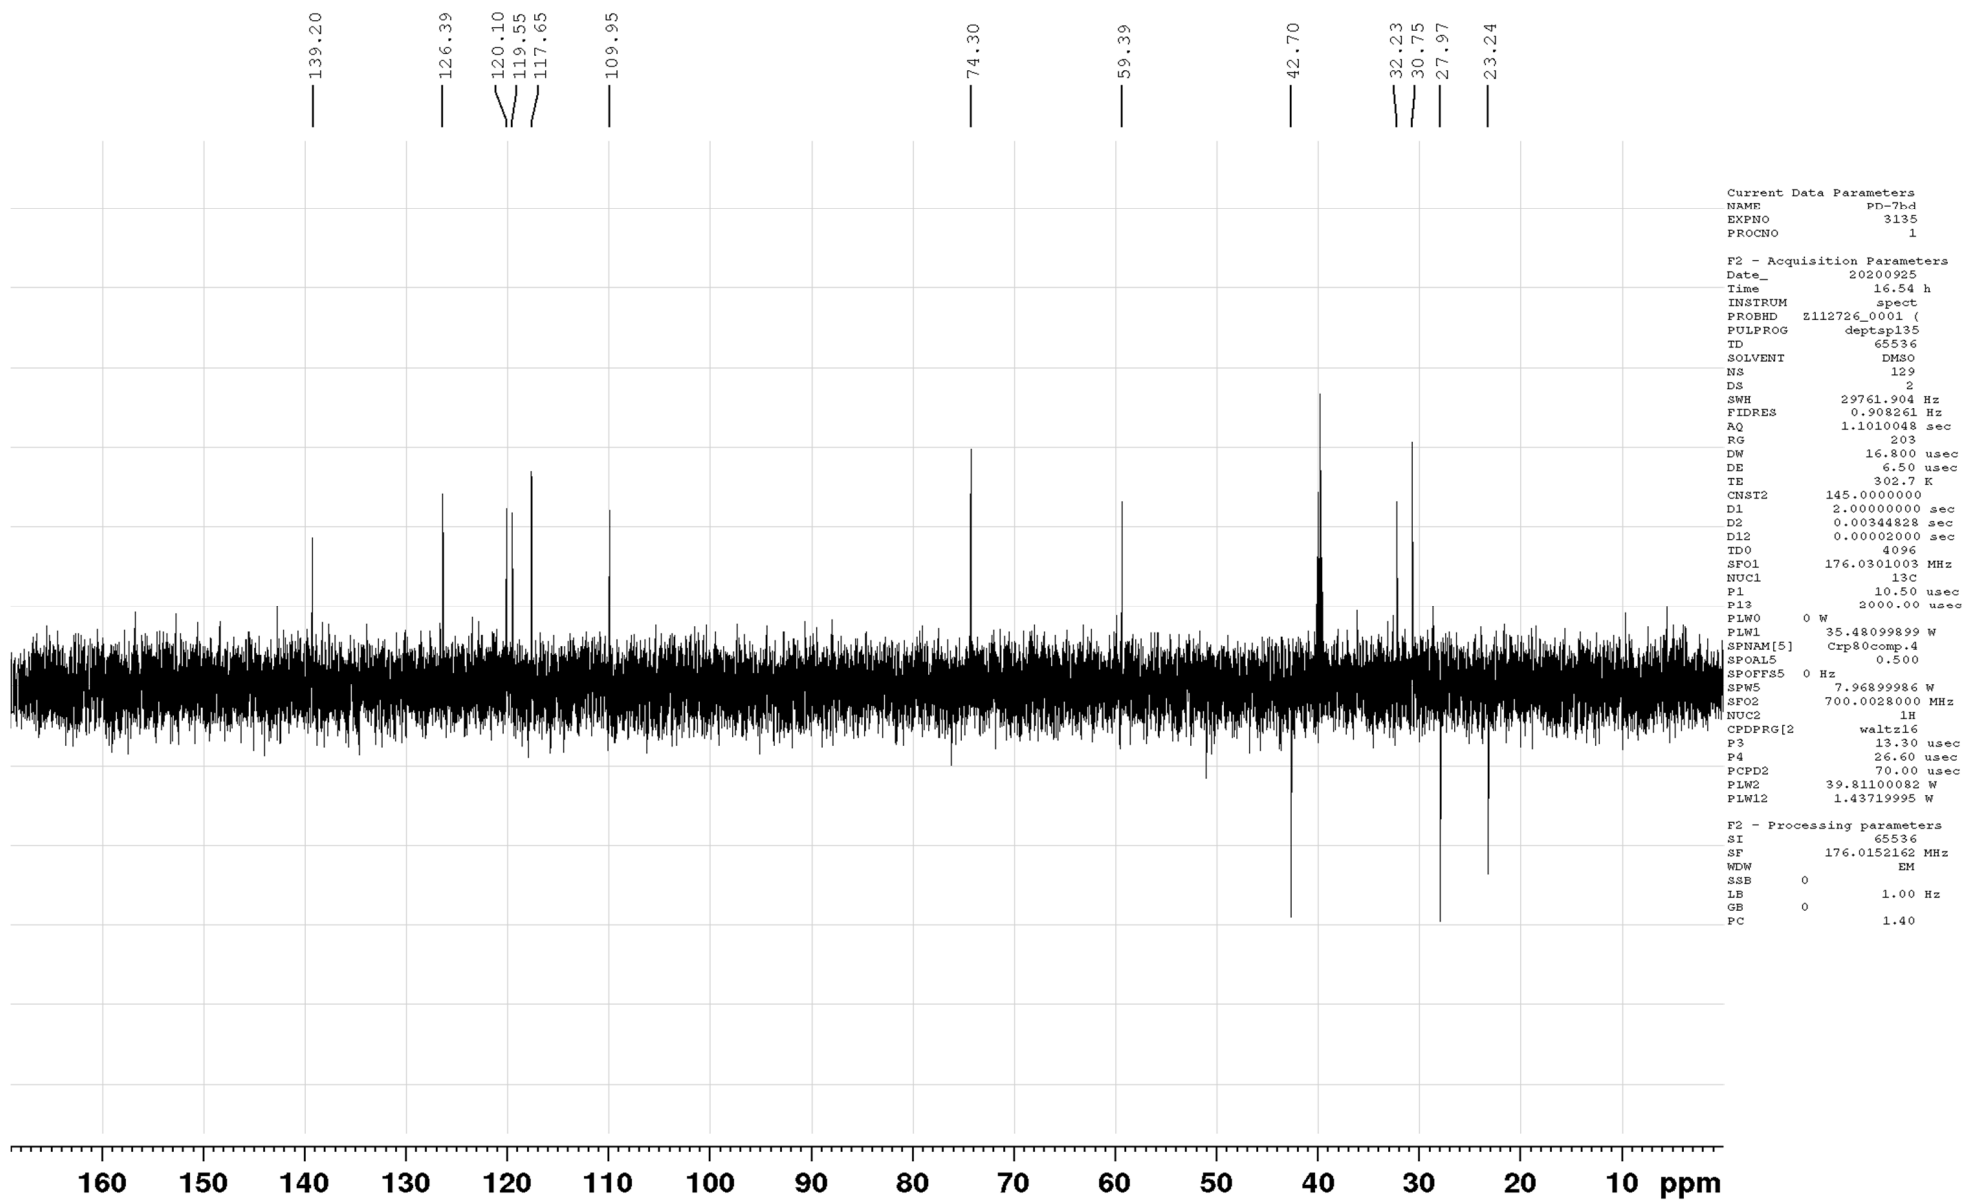

Figure S52. DEPT-135 NMR spectrum (176 MHz, DMSO-d<sub>6</sub>) of 5

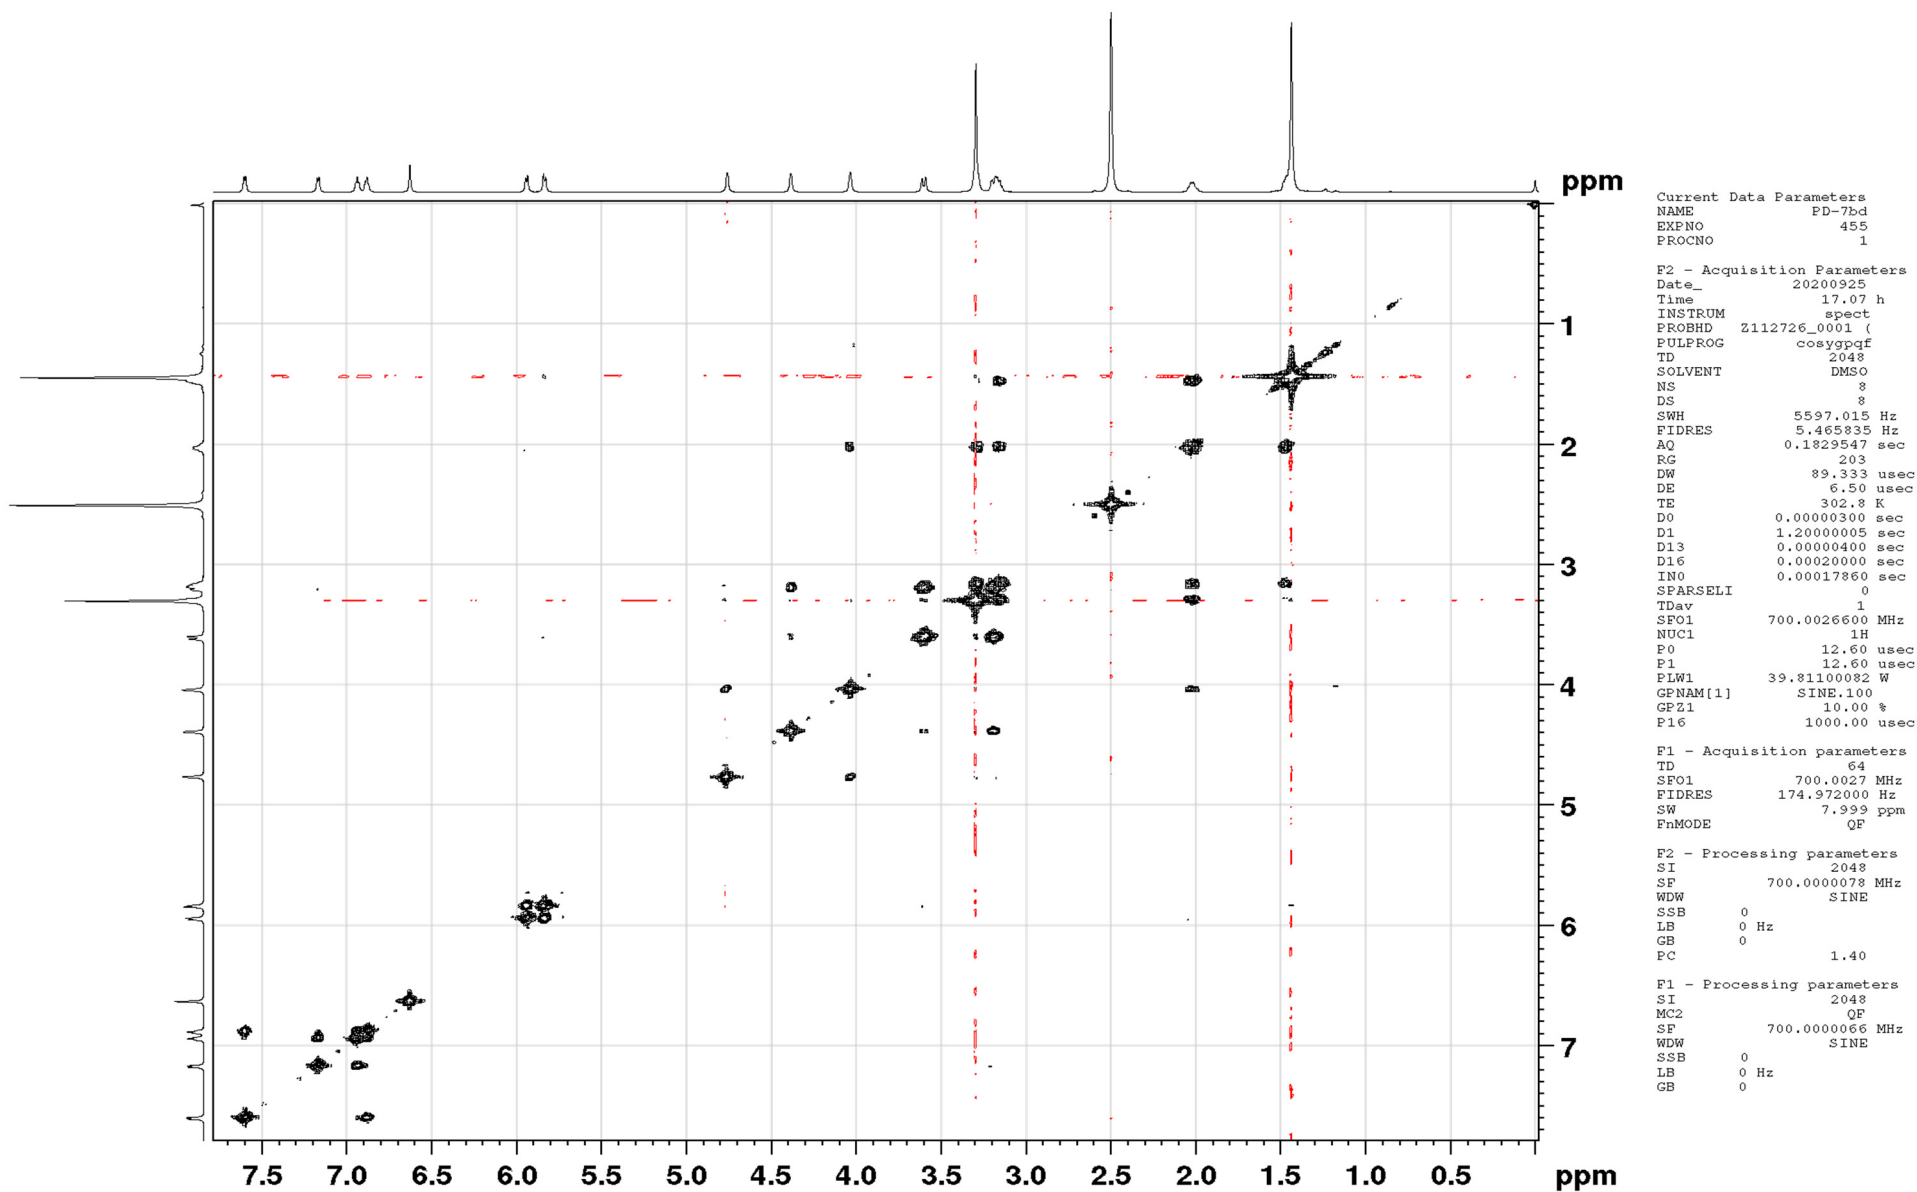

Figure S53. COSY-45 spectrum (700 MHz, DMSO-d6) of 5



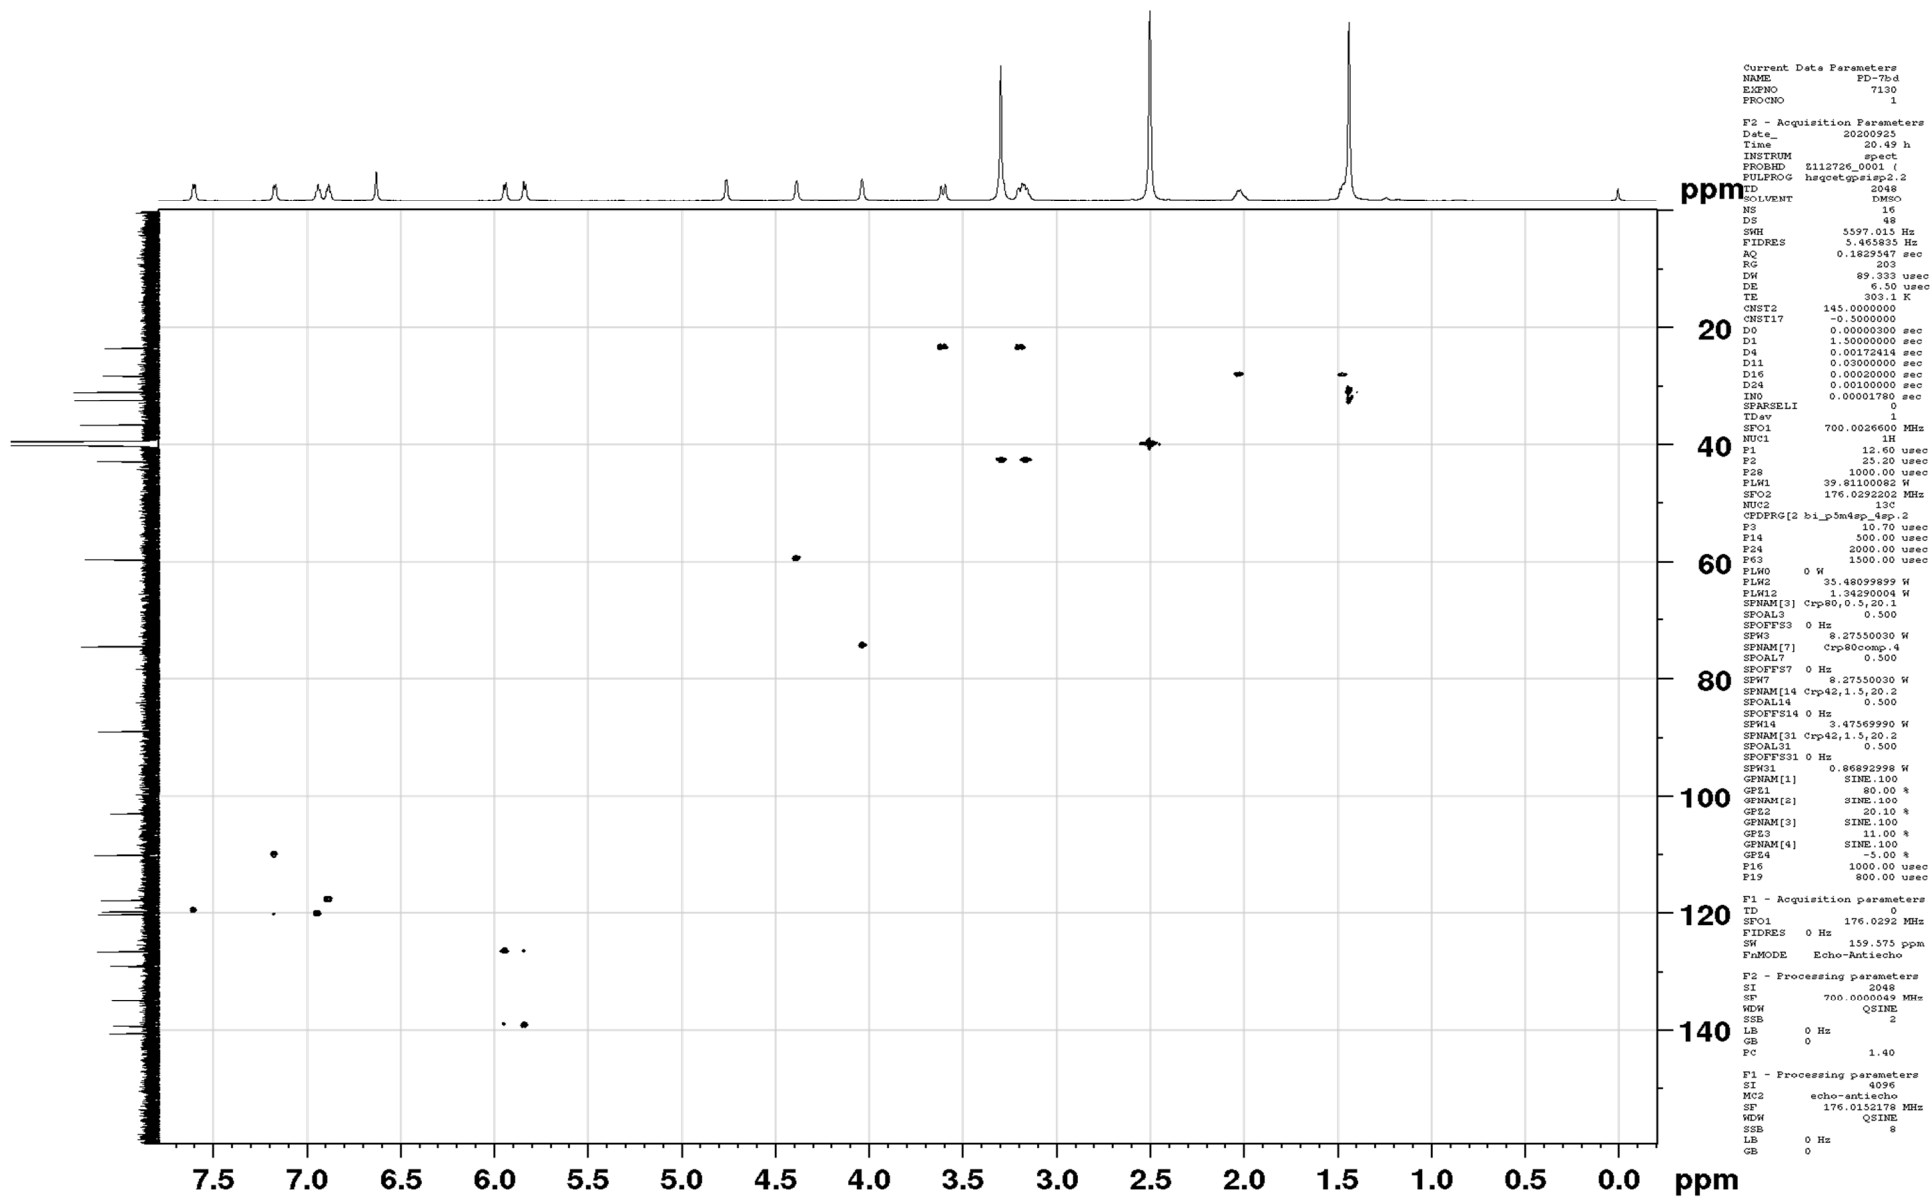

Figure S54. HSQC spectrum (700 MHz, DMSO-d6) of 5

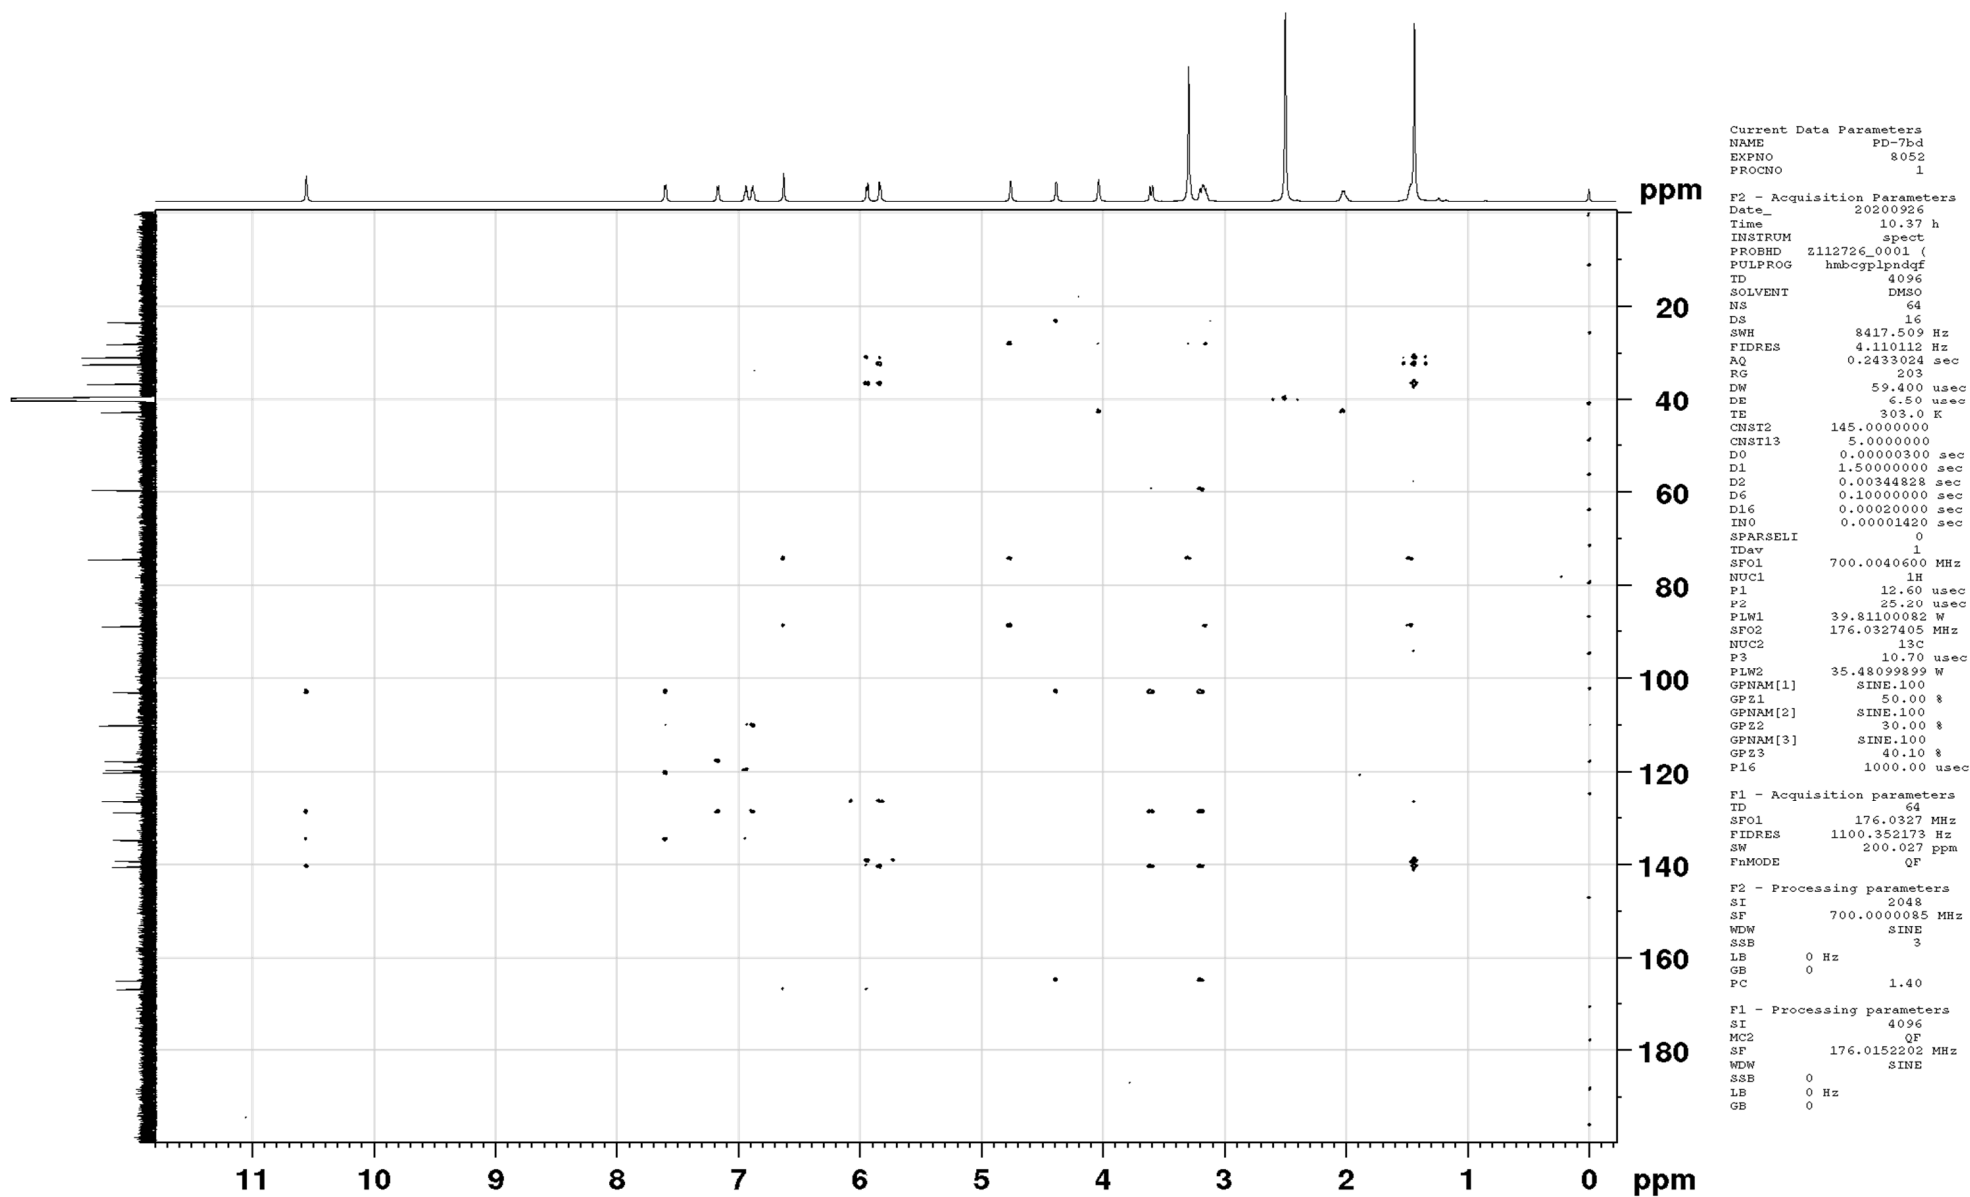

Figure S55. HMBC spectrum (700 MHz, DMSO-d<sub>6</sub>) of 5

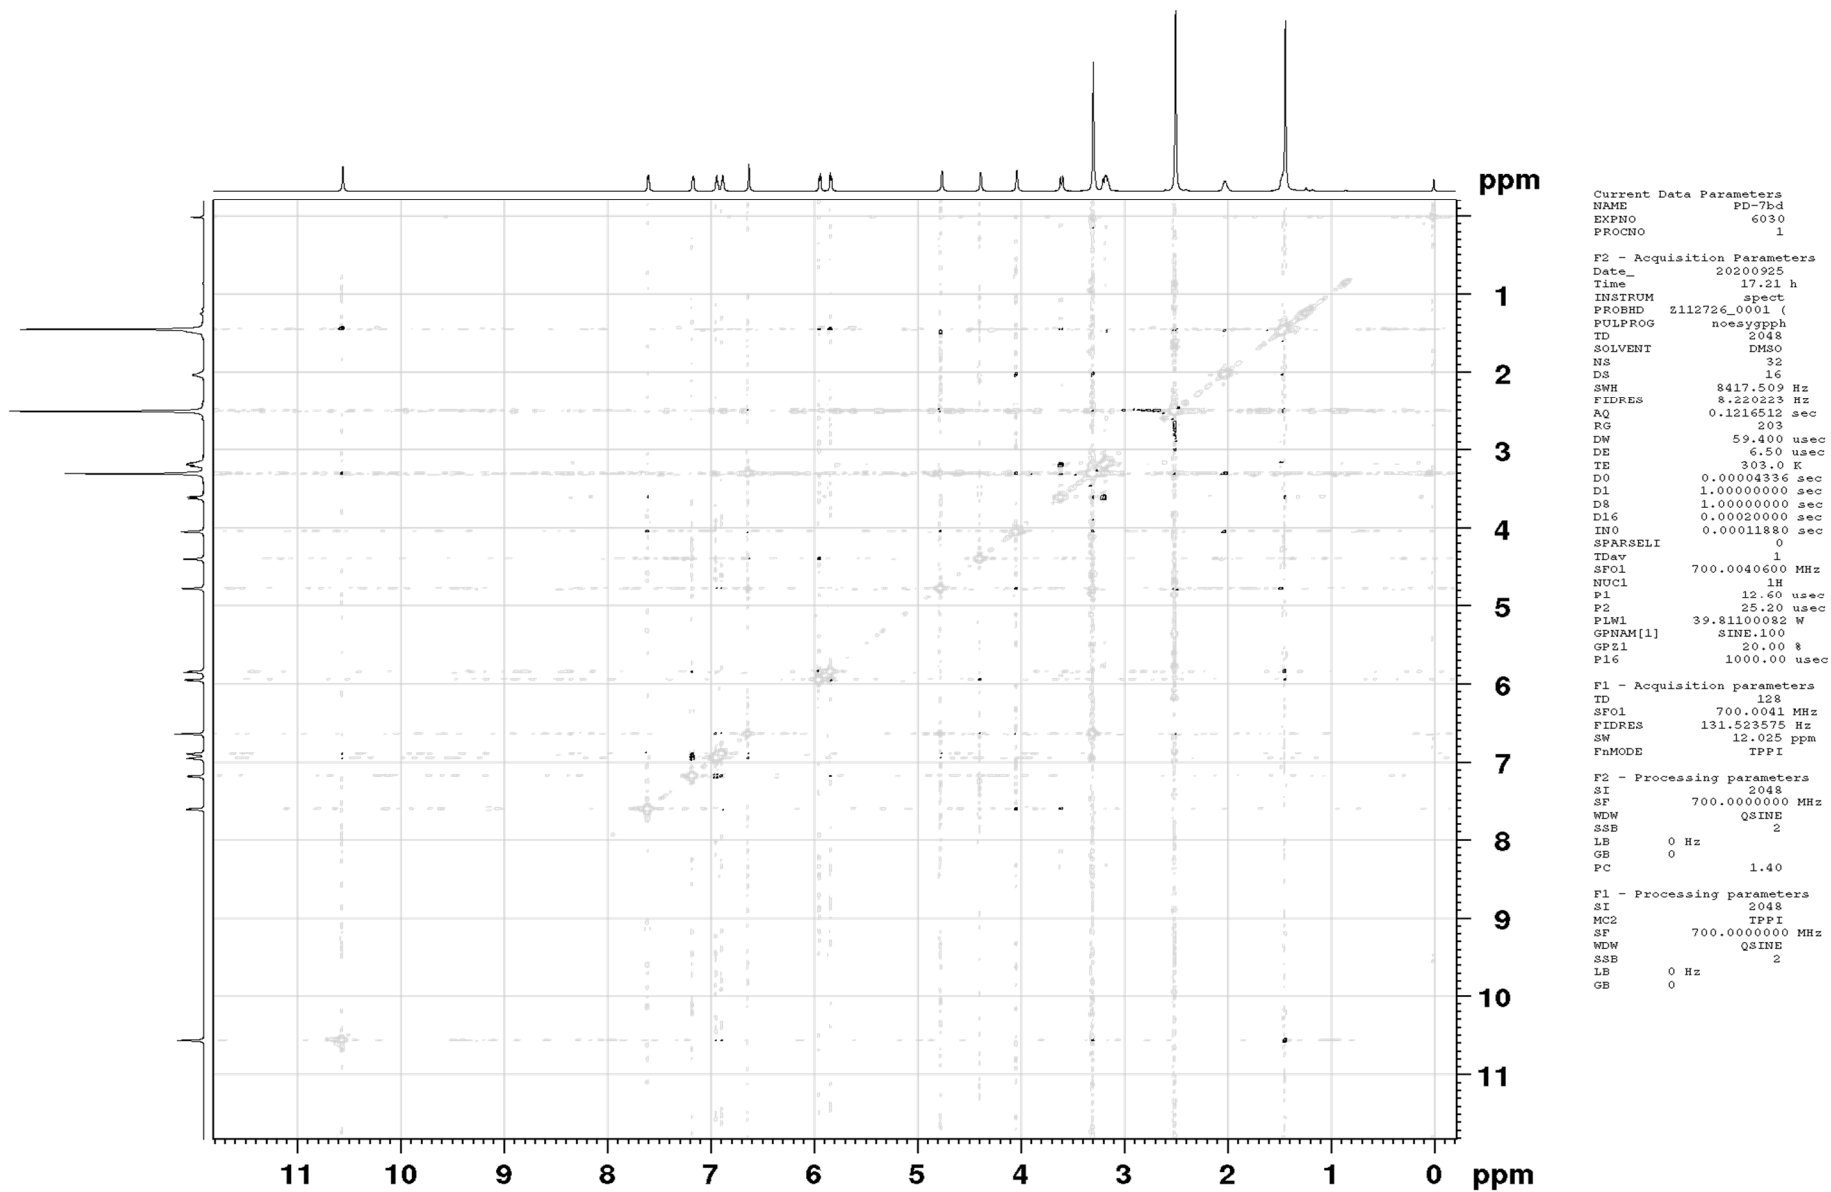

Figure S56. NOESY spectrum (700 MHz, DMSO-d6) of 5

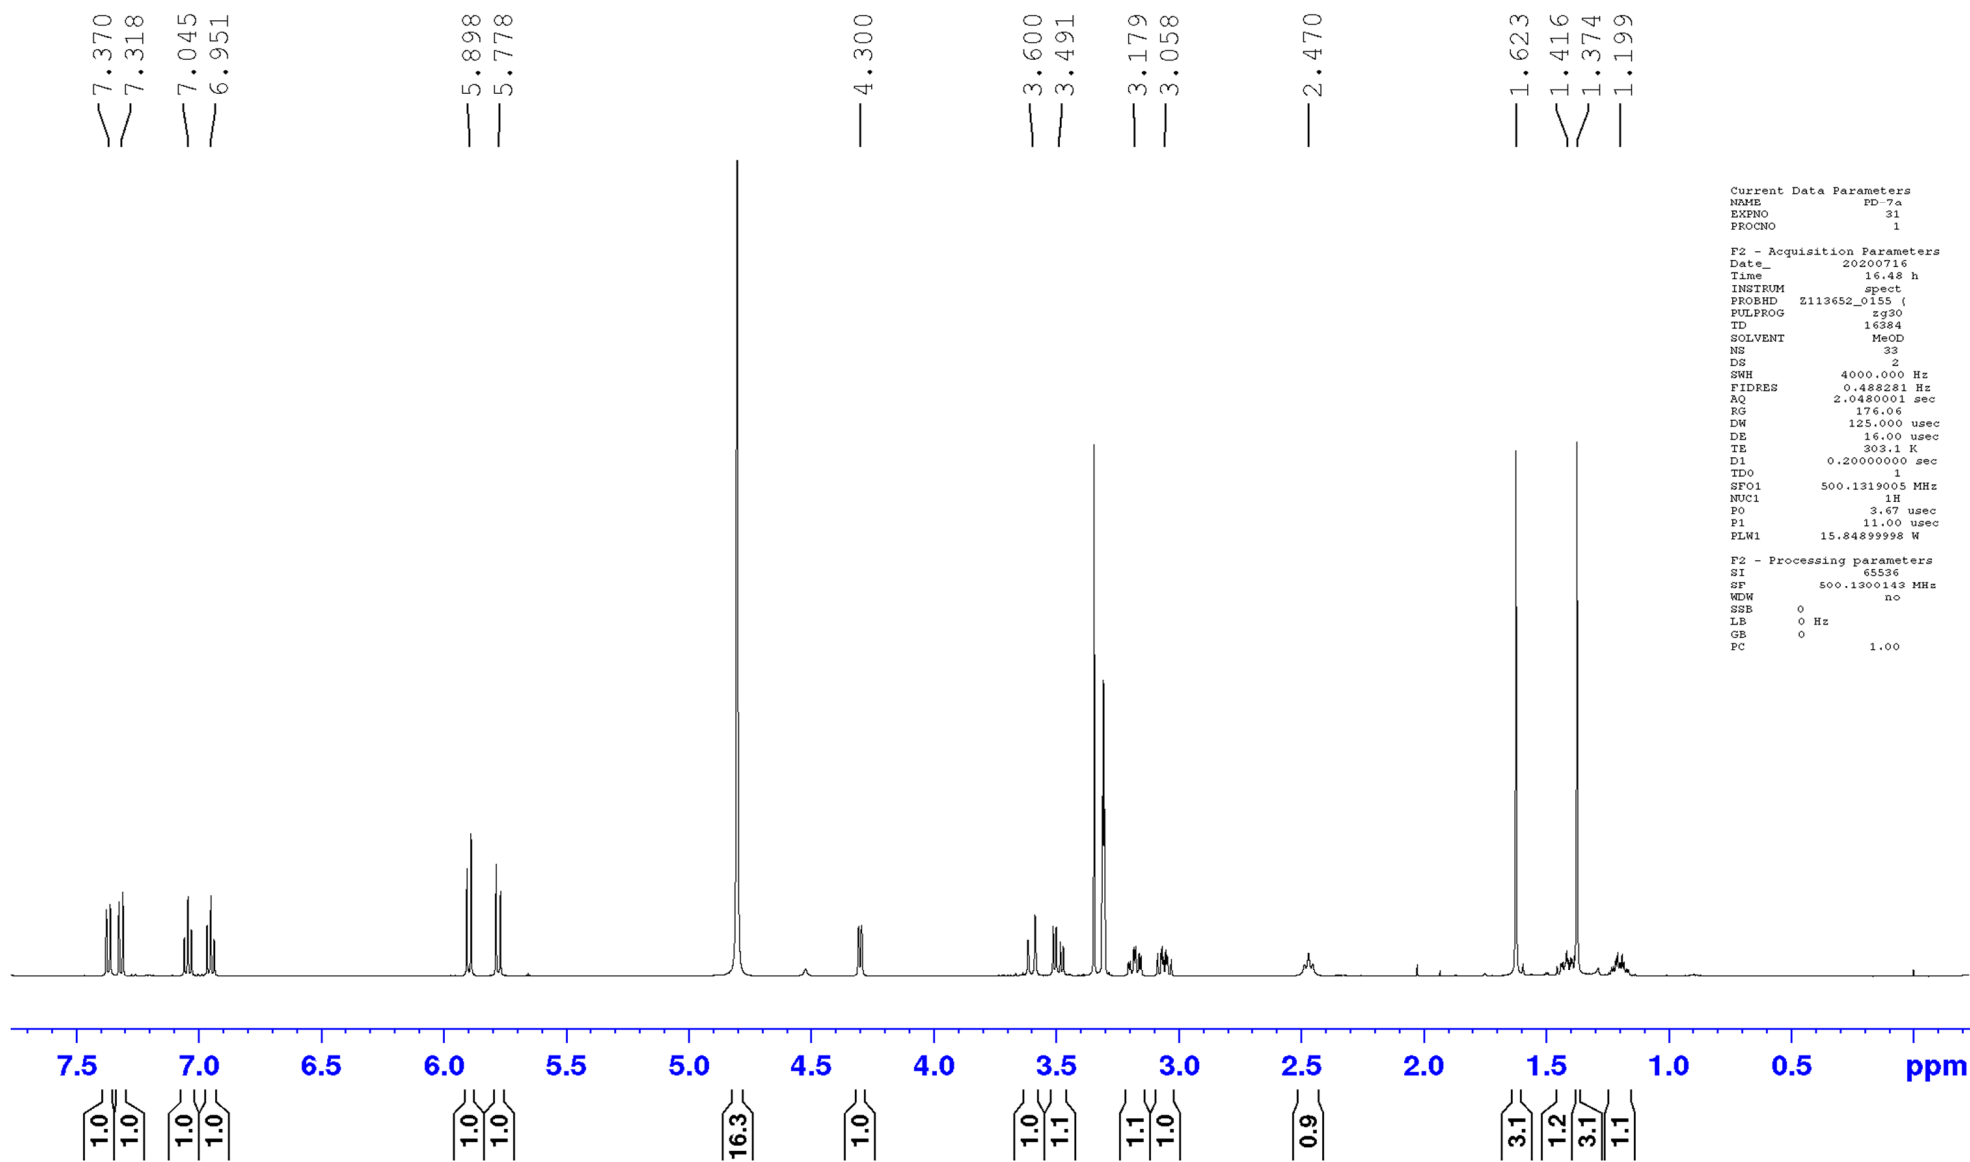

Figure S57.  $^1\text{H}$  NMR spectrum (500 MHz,  $\text{CD}_3\text{OD}$ ) of **6**

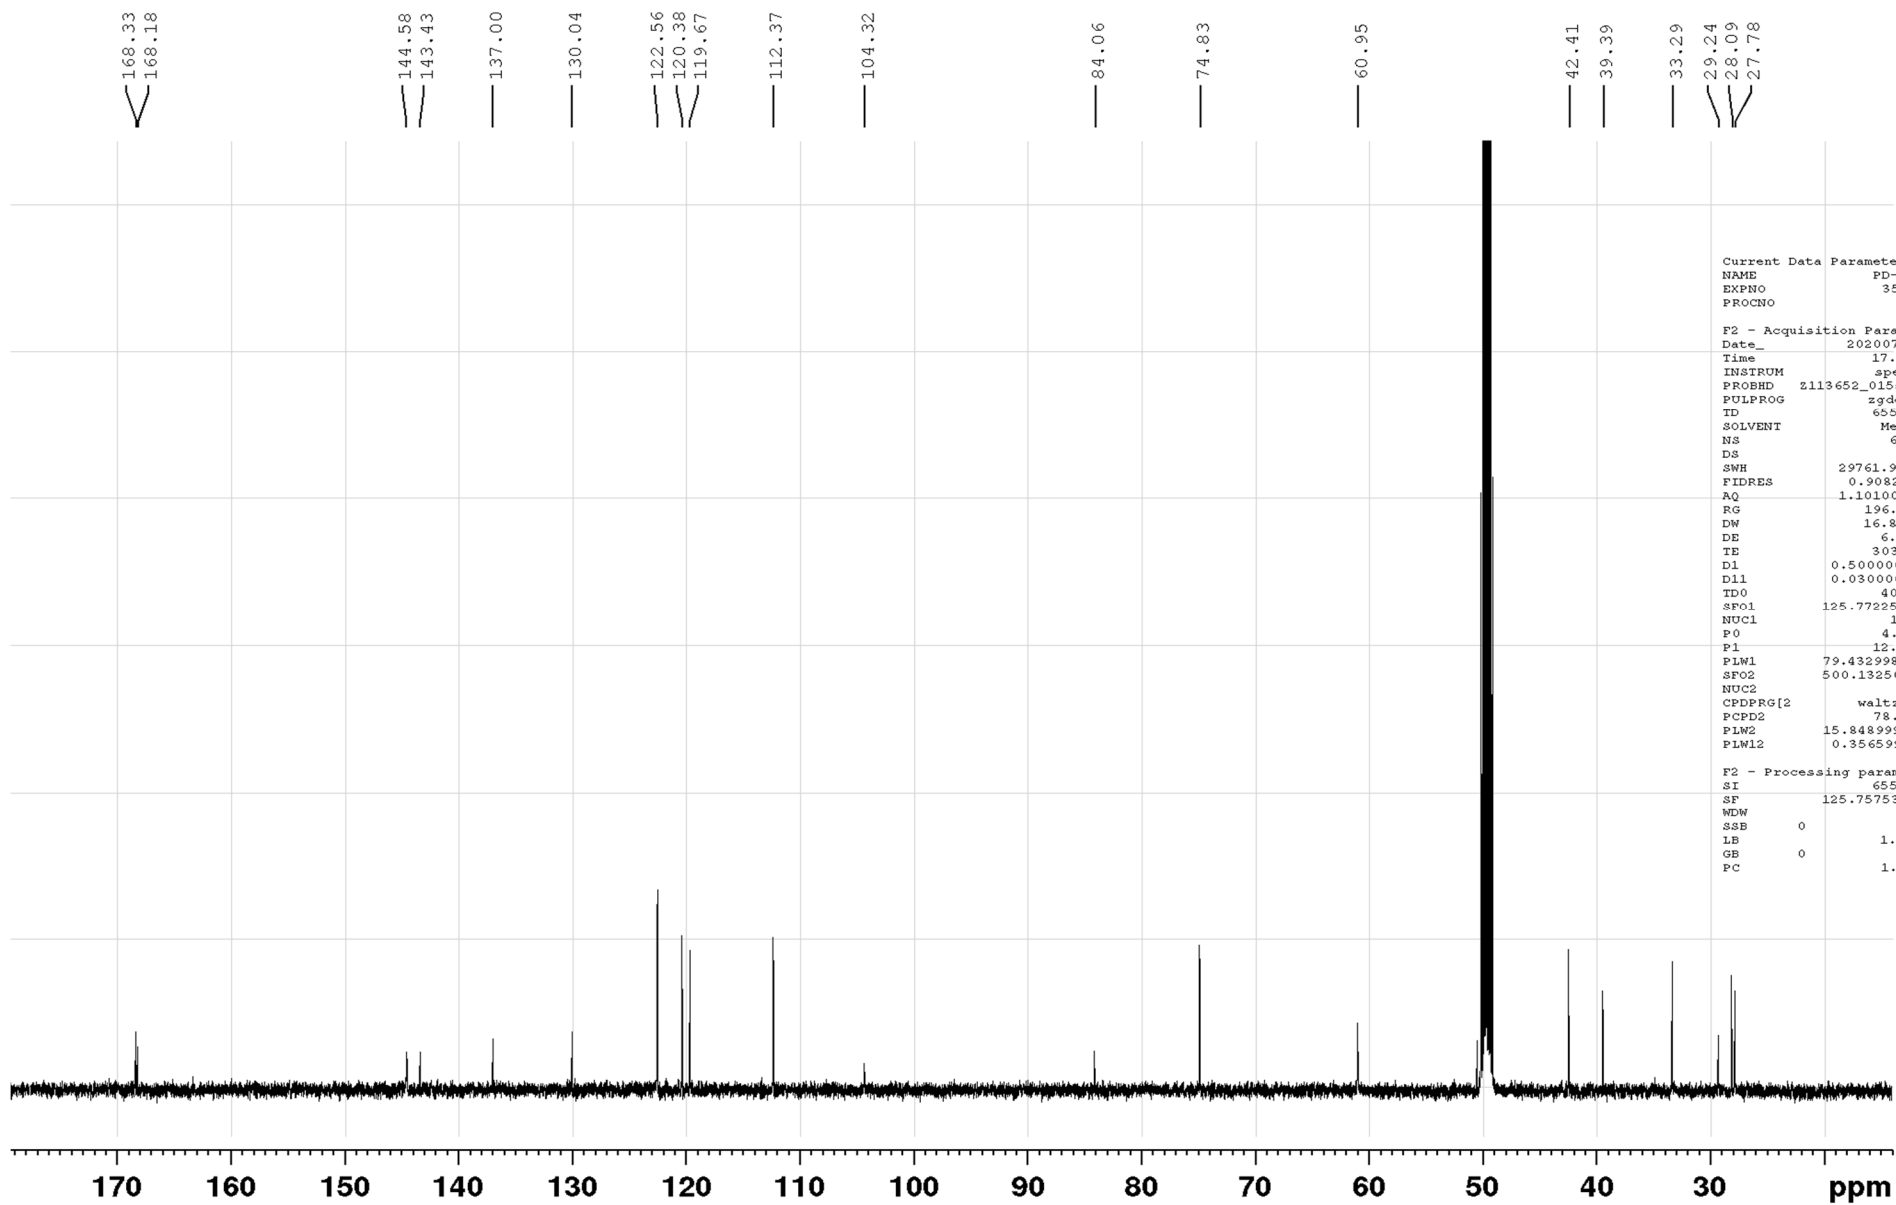

Figure S58. <sup>13</sup>C NMR spectrum (125 MHz, CD<sub>3</sub>OD) of 6

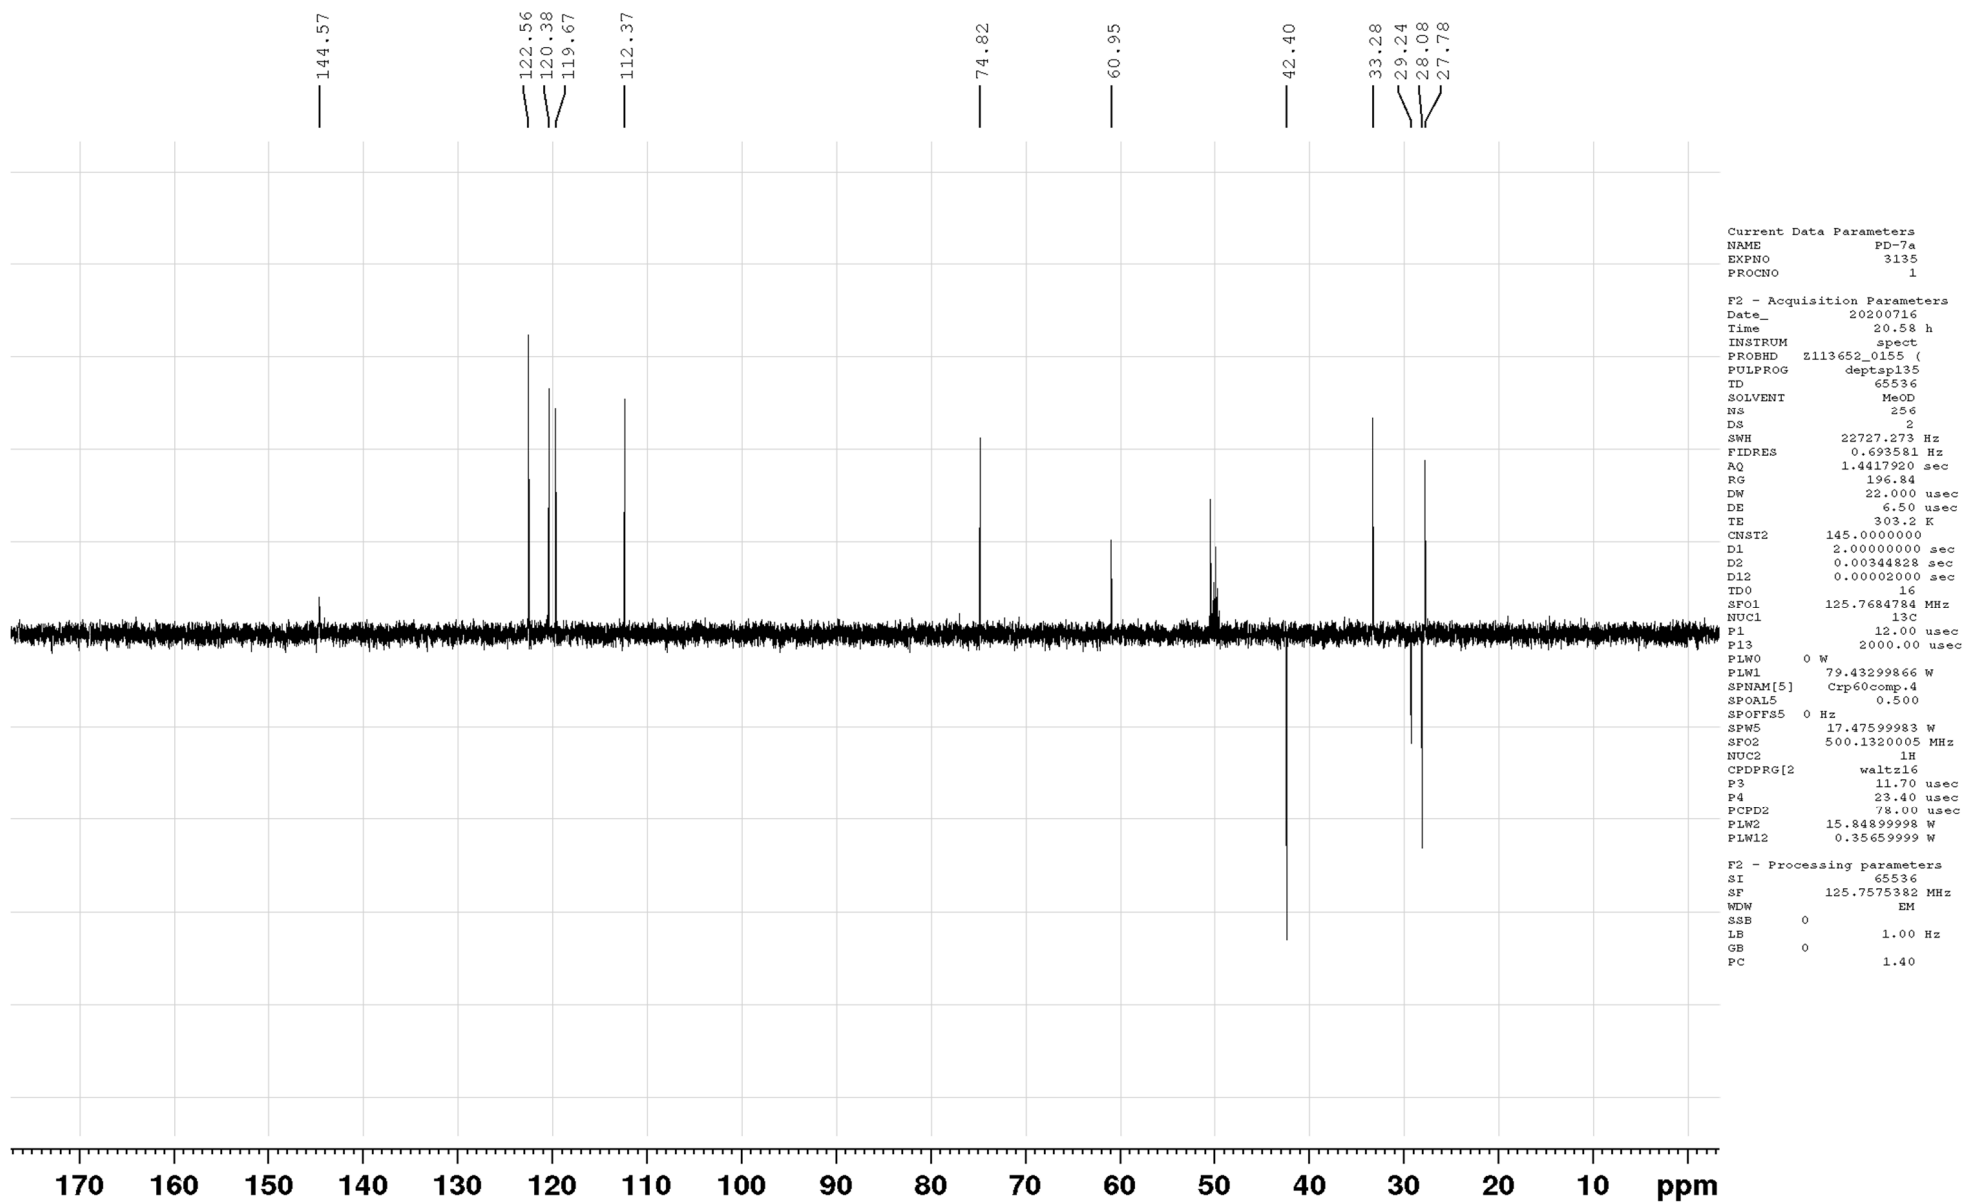

Figure S59. DEPT-135 NMR spectrum (125 MHz, CD<sub>3</sub>OD) of 6

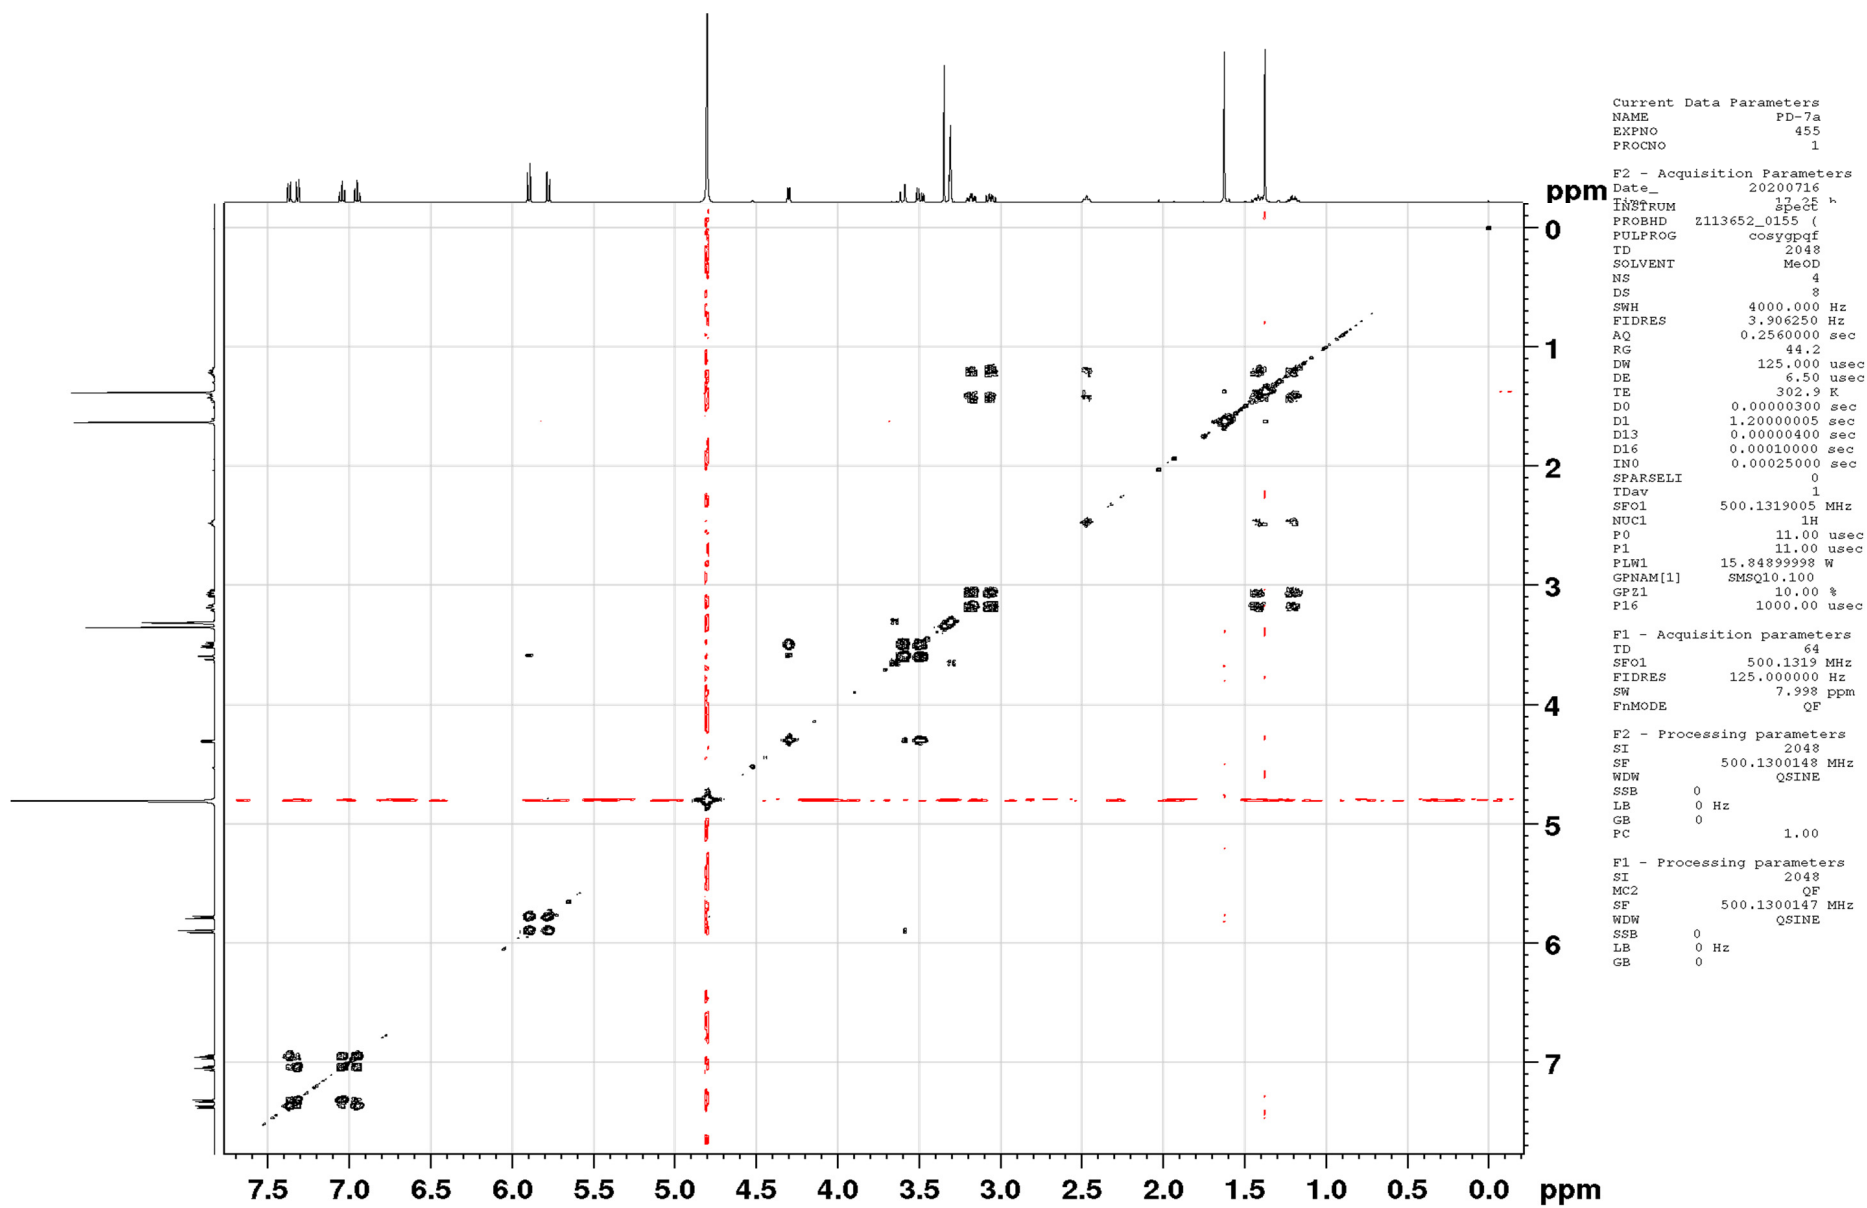

Figure S60. COSY-45 spectrum (500 MHz, CD<sub>3</sub>OD) of 6

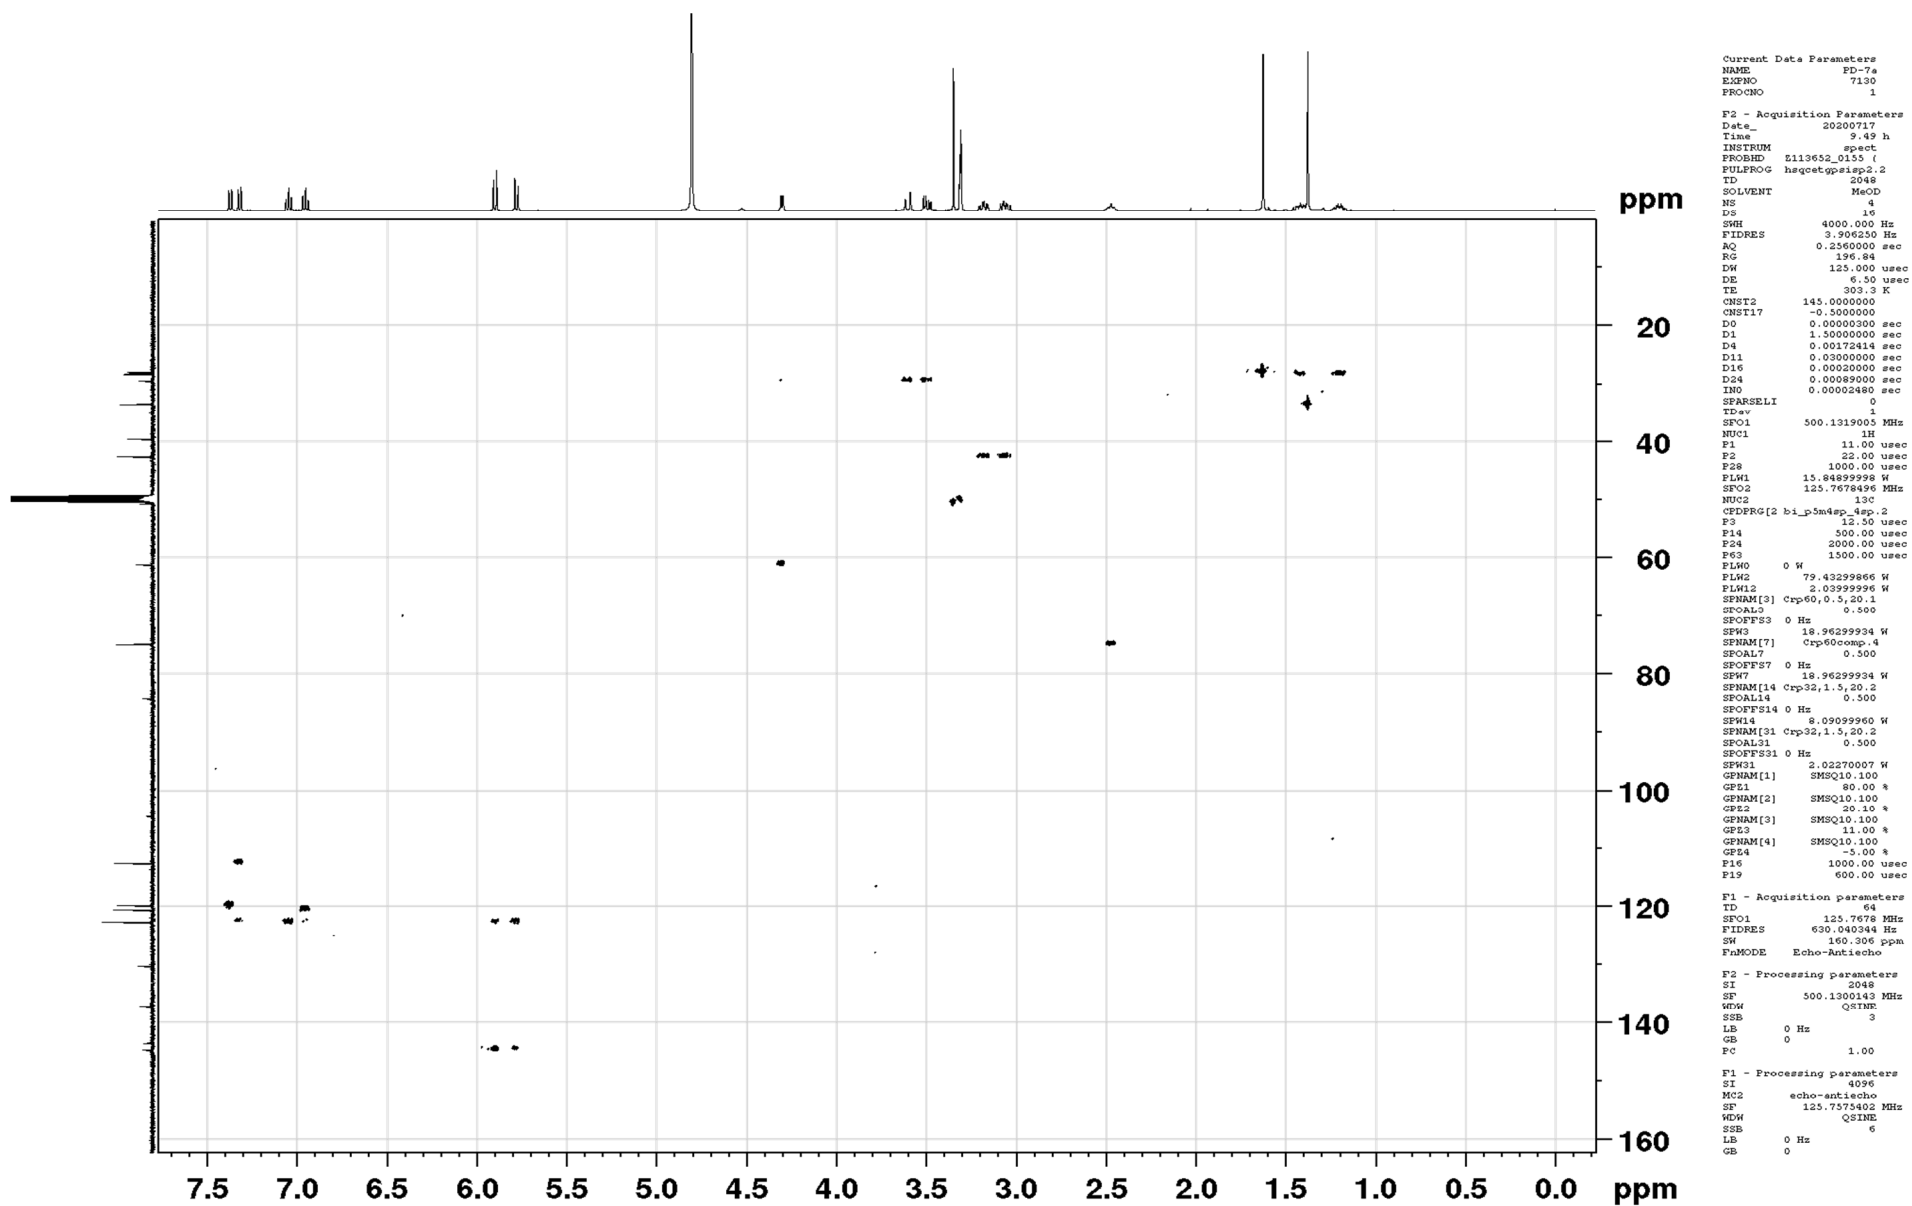

Figure S61. HSQC spectrum (500 MHz, CD<sub>3</sub>OD) of 6



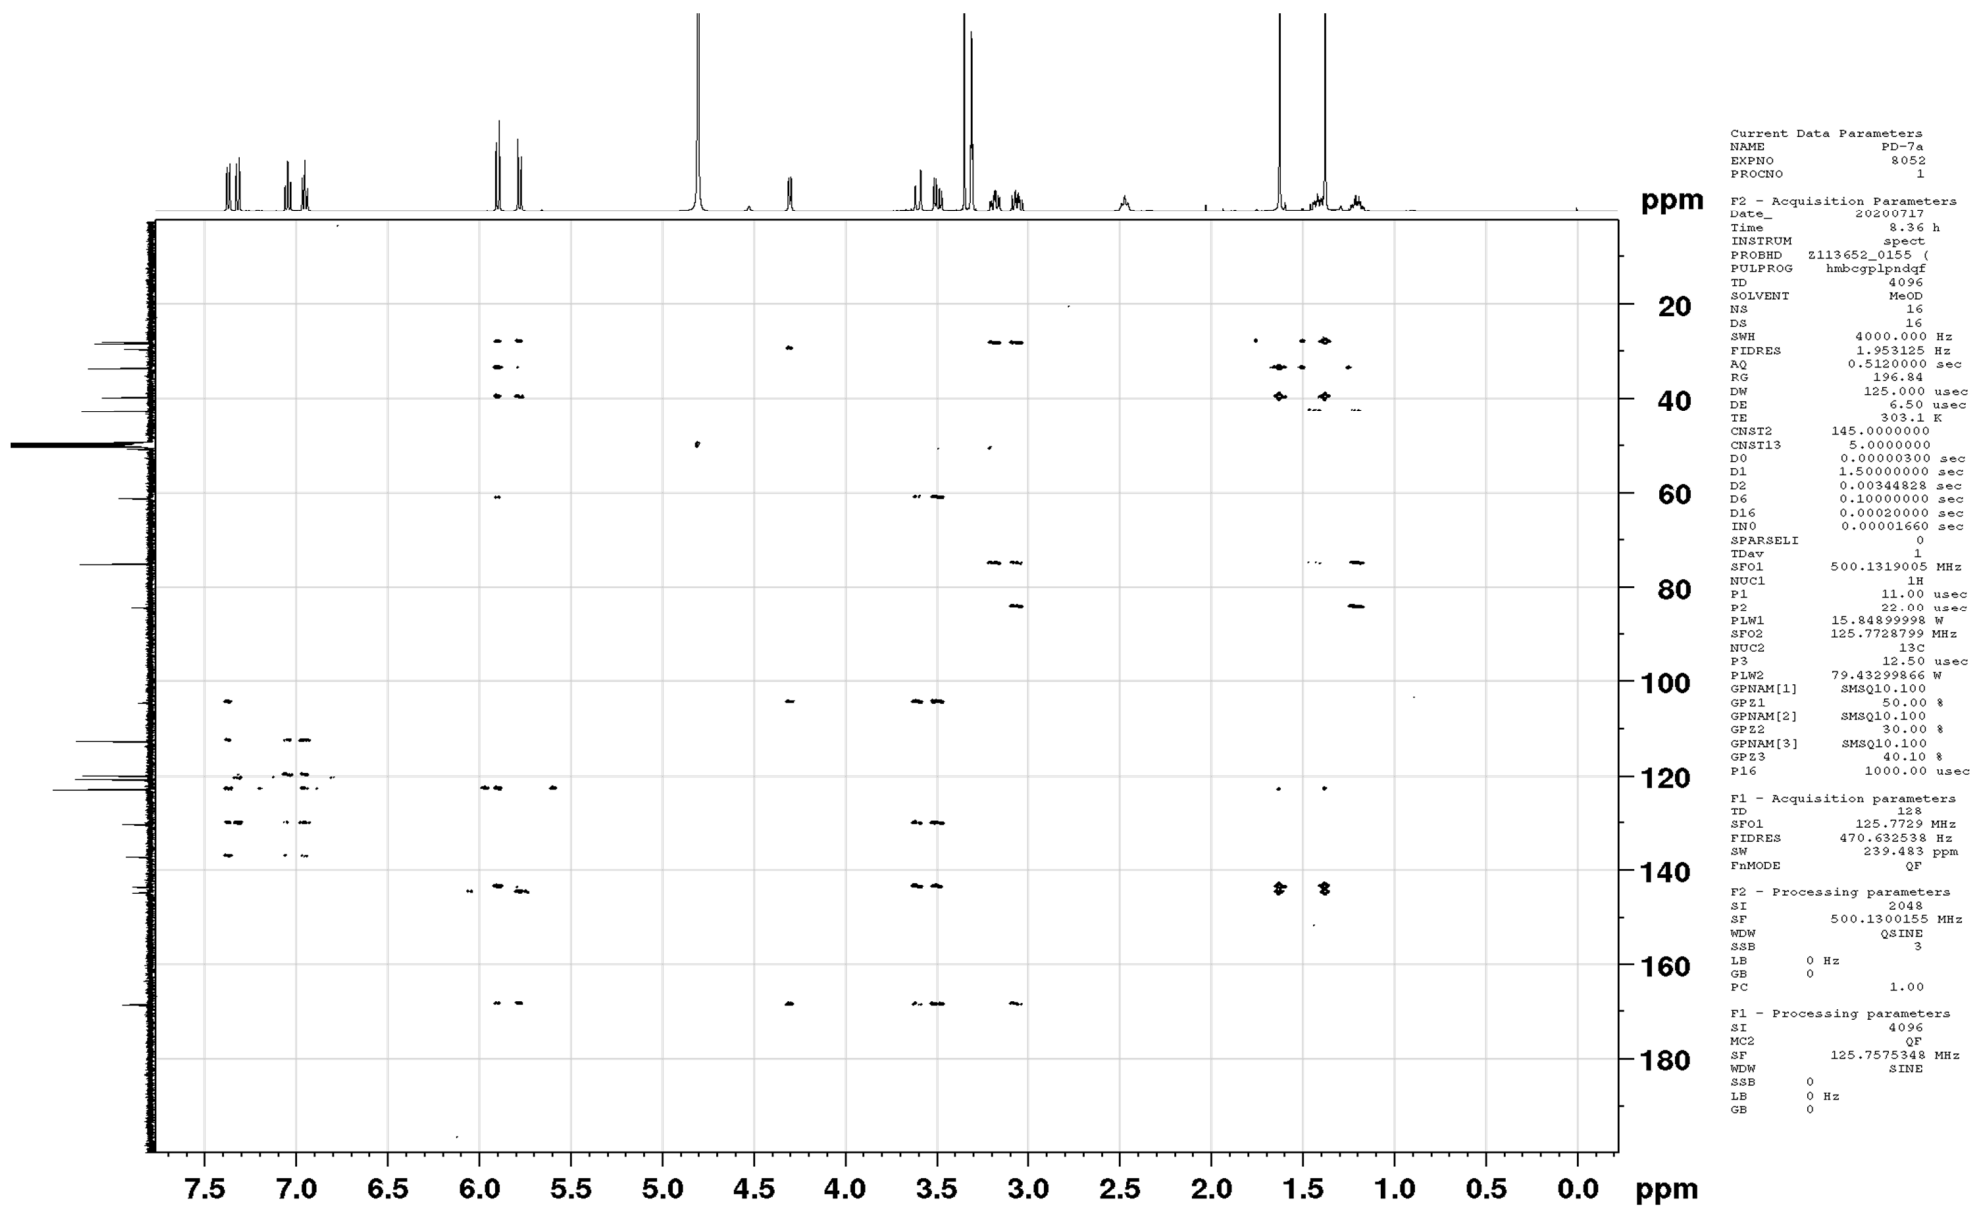

Figure S62. HMBC spectrum (500 MHz, CD<sub>3</sub>OD) of 6

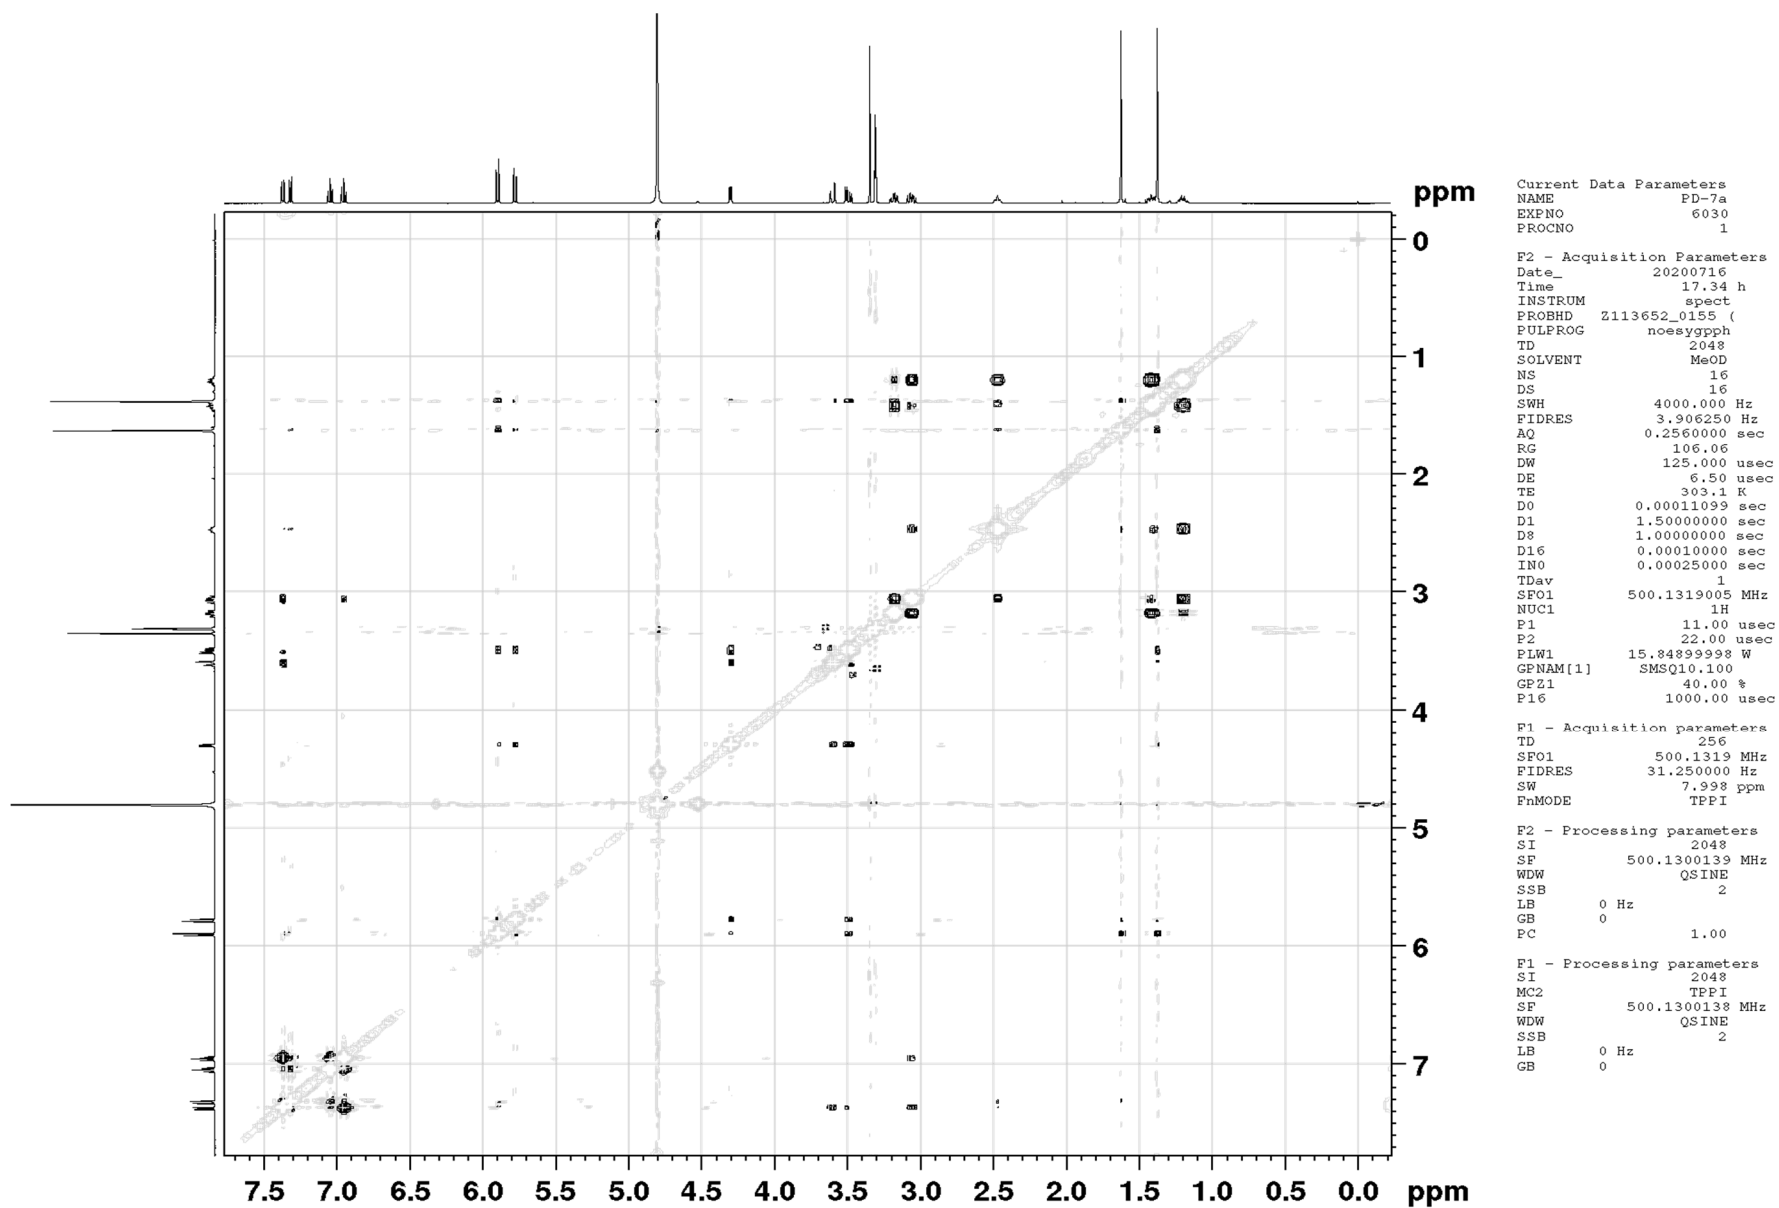

Figure S63. NOESY spectrum (500 MHz, CD<sub>3</sub>OD) of 6

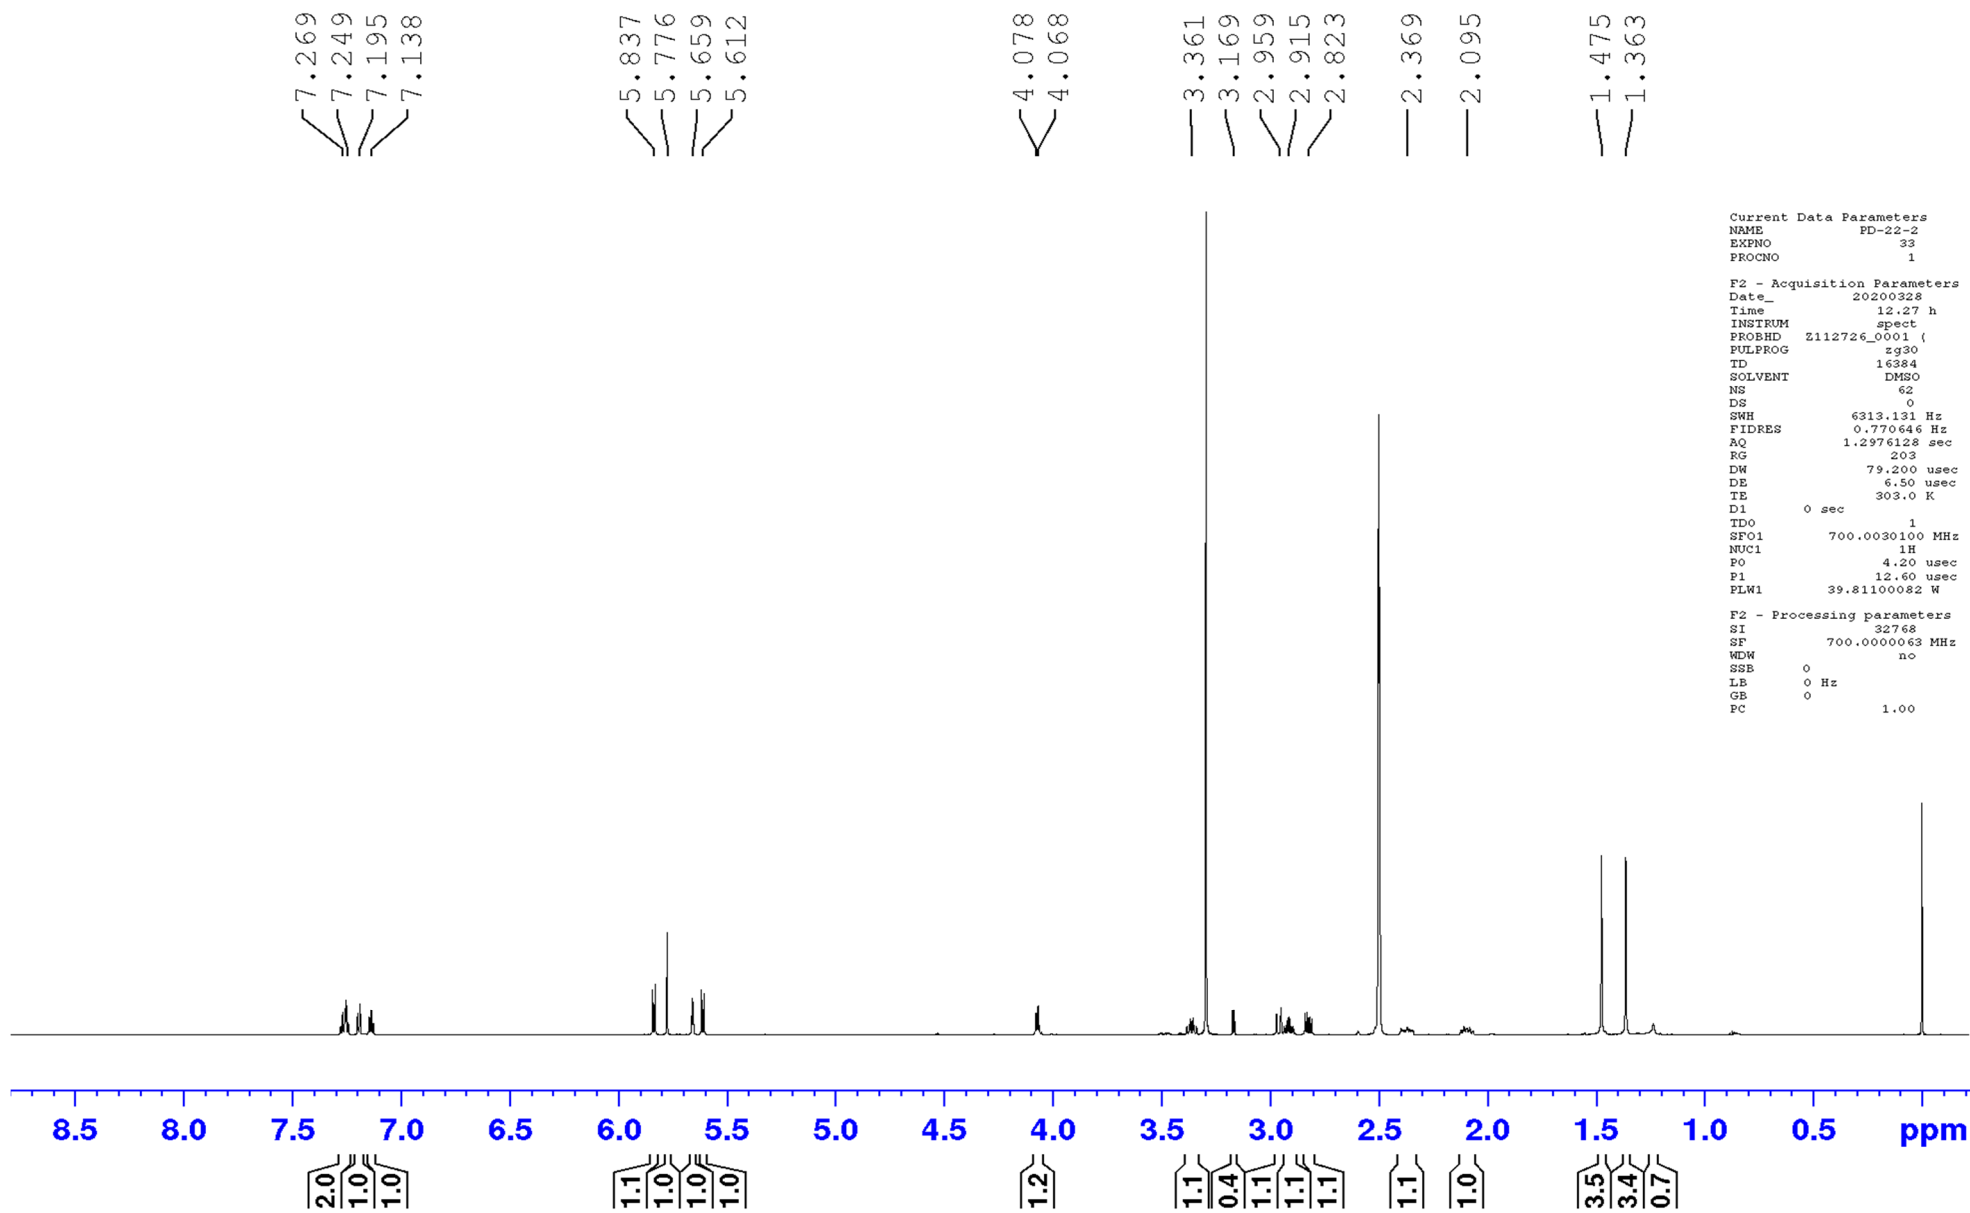

Figure S64.  $^1\text{H}$  NMR spectrum (700 MHz,  $\text{DMSO-d}_6$ ) of 7

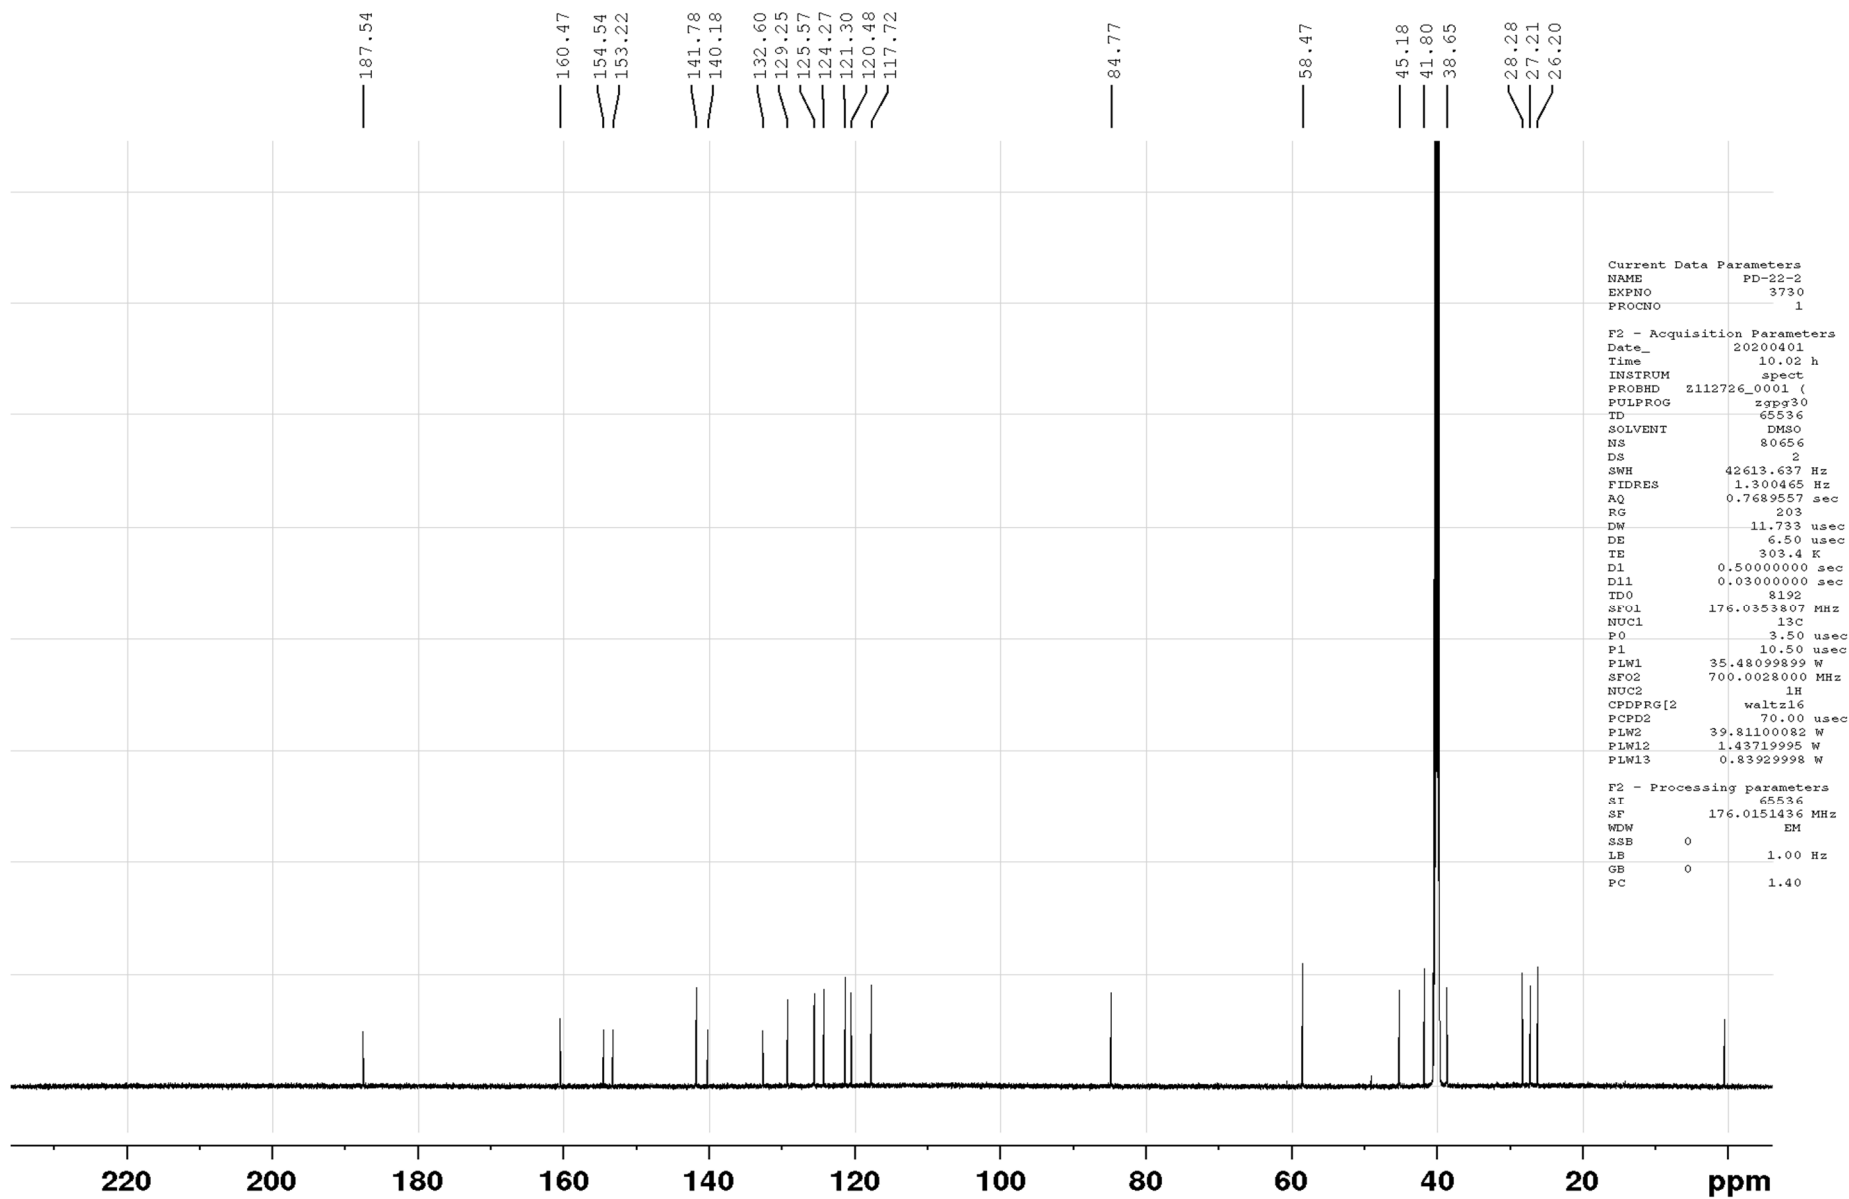

Figure S65.  $^{13}\text{C}$  NMR spectrum (176 MHz,  $\text{DMSO-d}_6$ ) of 7

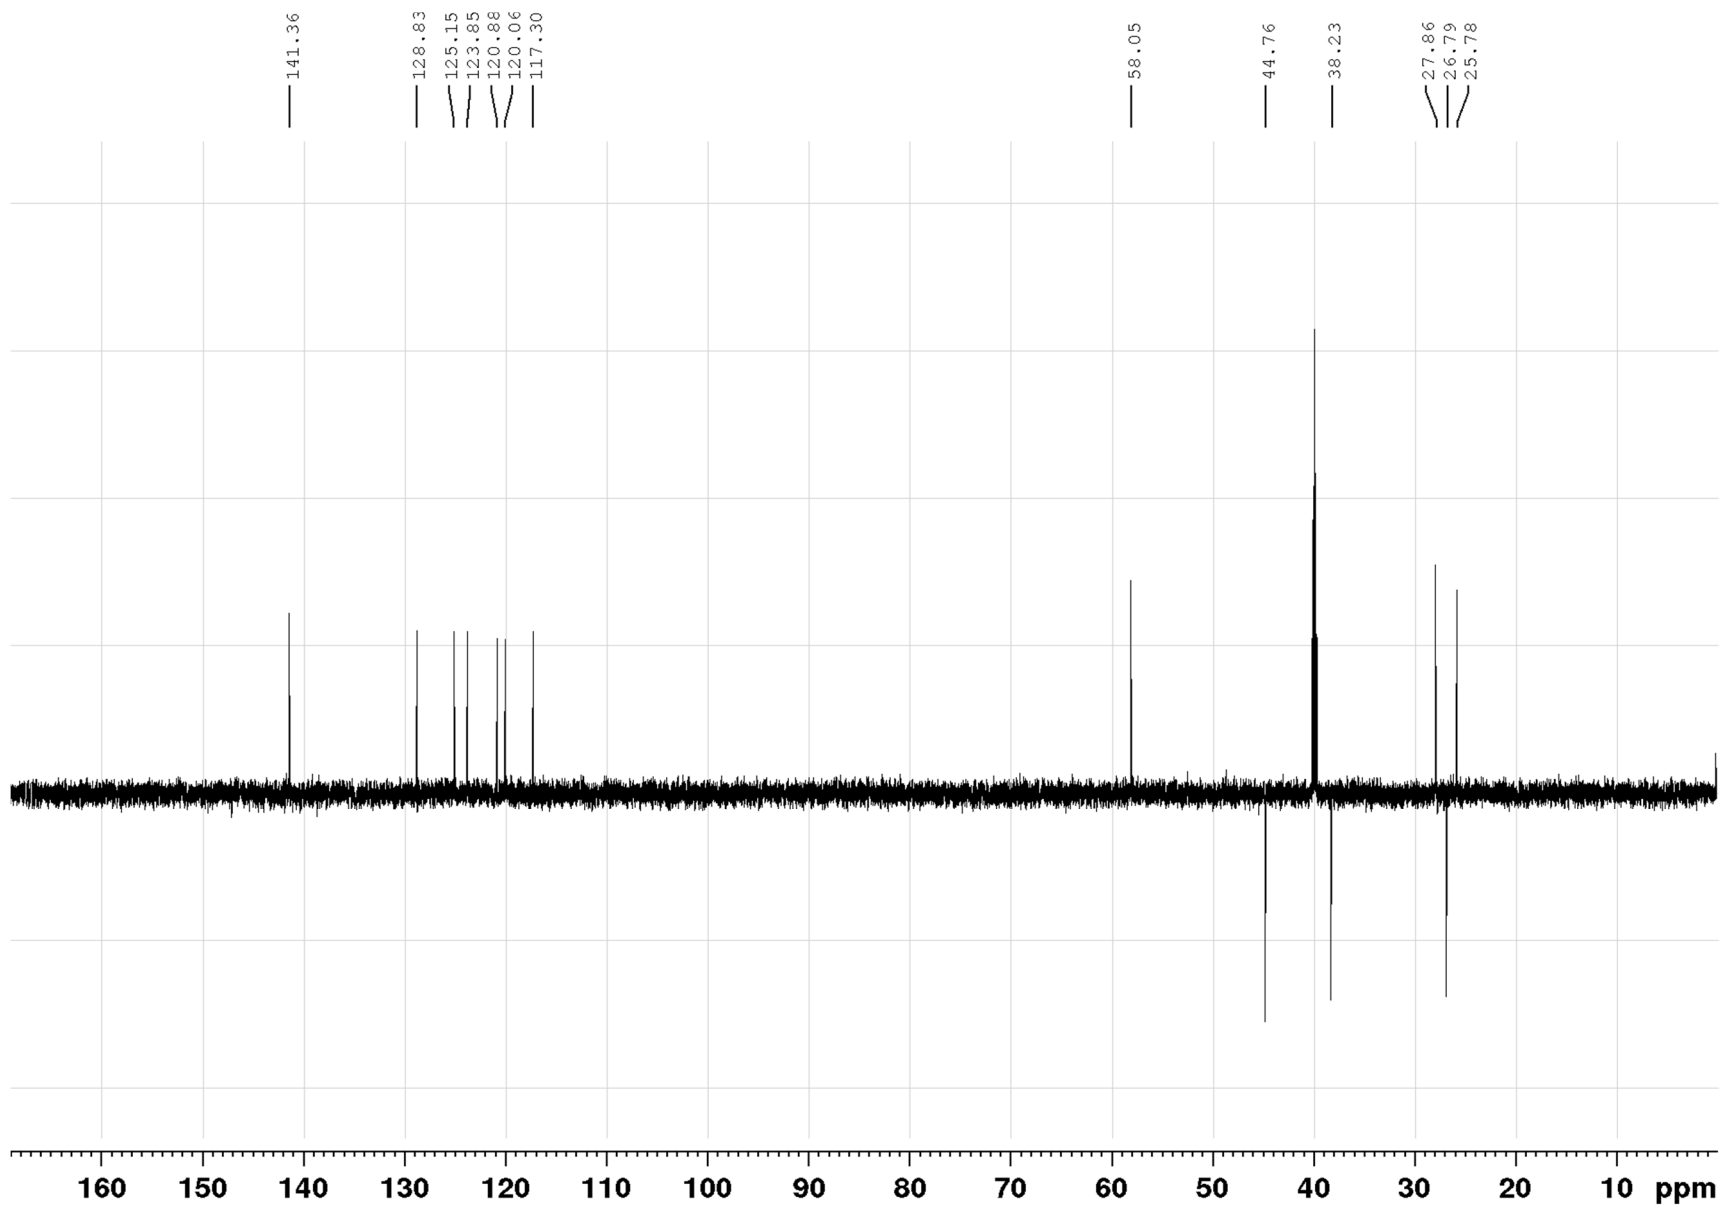

```

Current Data Parameters
NAME      PD-22-2
EXPNO    3135
PROCNO   1

F2 - Acquisition Parameters
Date_    20200331
Time     3.17 h
INSTRUM  spect
PROBHD   Z112726_0001 (
PULPROG  deptsp135
TD       65536
SOLVENT  DMSO
NS       2048
DS       2
SWH      29761.904 Hz
FIDRES   0.908261 Hz
AQ       1.1010048 sec
RG       203
DW       16.800 usec
DE       6.50 usec
TE       303.5 K
CNST2    145.000000
D1       2.00000000 sec
D2       0.00344828 sec
D12      0.00002000 sec
TD0      128
SFO1     176.0301003 MHz
NUC1     13C
P1       10.50 usec
P13      2000.00 usec
PLW0     0 W
PLW1     35.48099899 W
SPNAM[5] Crp80comp.4
SFOAL5   0.500
SPOFFS5  0 Hz
SPW5     7.96899986 W
SFO2     700.0028000 MHz
NUC2     1H
CPDPRG[2] waltz16
P3       13.30 usec
P4       26.60 usec
PCPD2    70.00 usec
PLW2     39.81100082 W
PLW12    1.43719995 W

F2 - Processing parameters
SI       65536
SF       176.0152175 MHz
WDW      EM
SSB      0
LB       1.00 Hz
GB       0
PC       1.40

```

Figure S66. DEPT-135 NMR spectrum (176 MHz, DMSO-d<sub>6</sub>) of 7

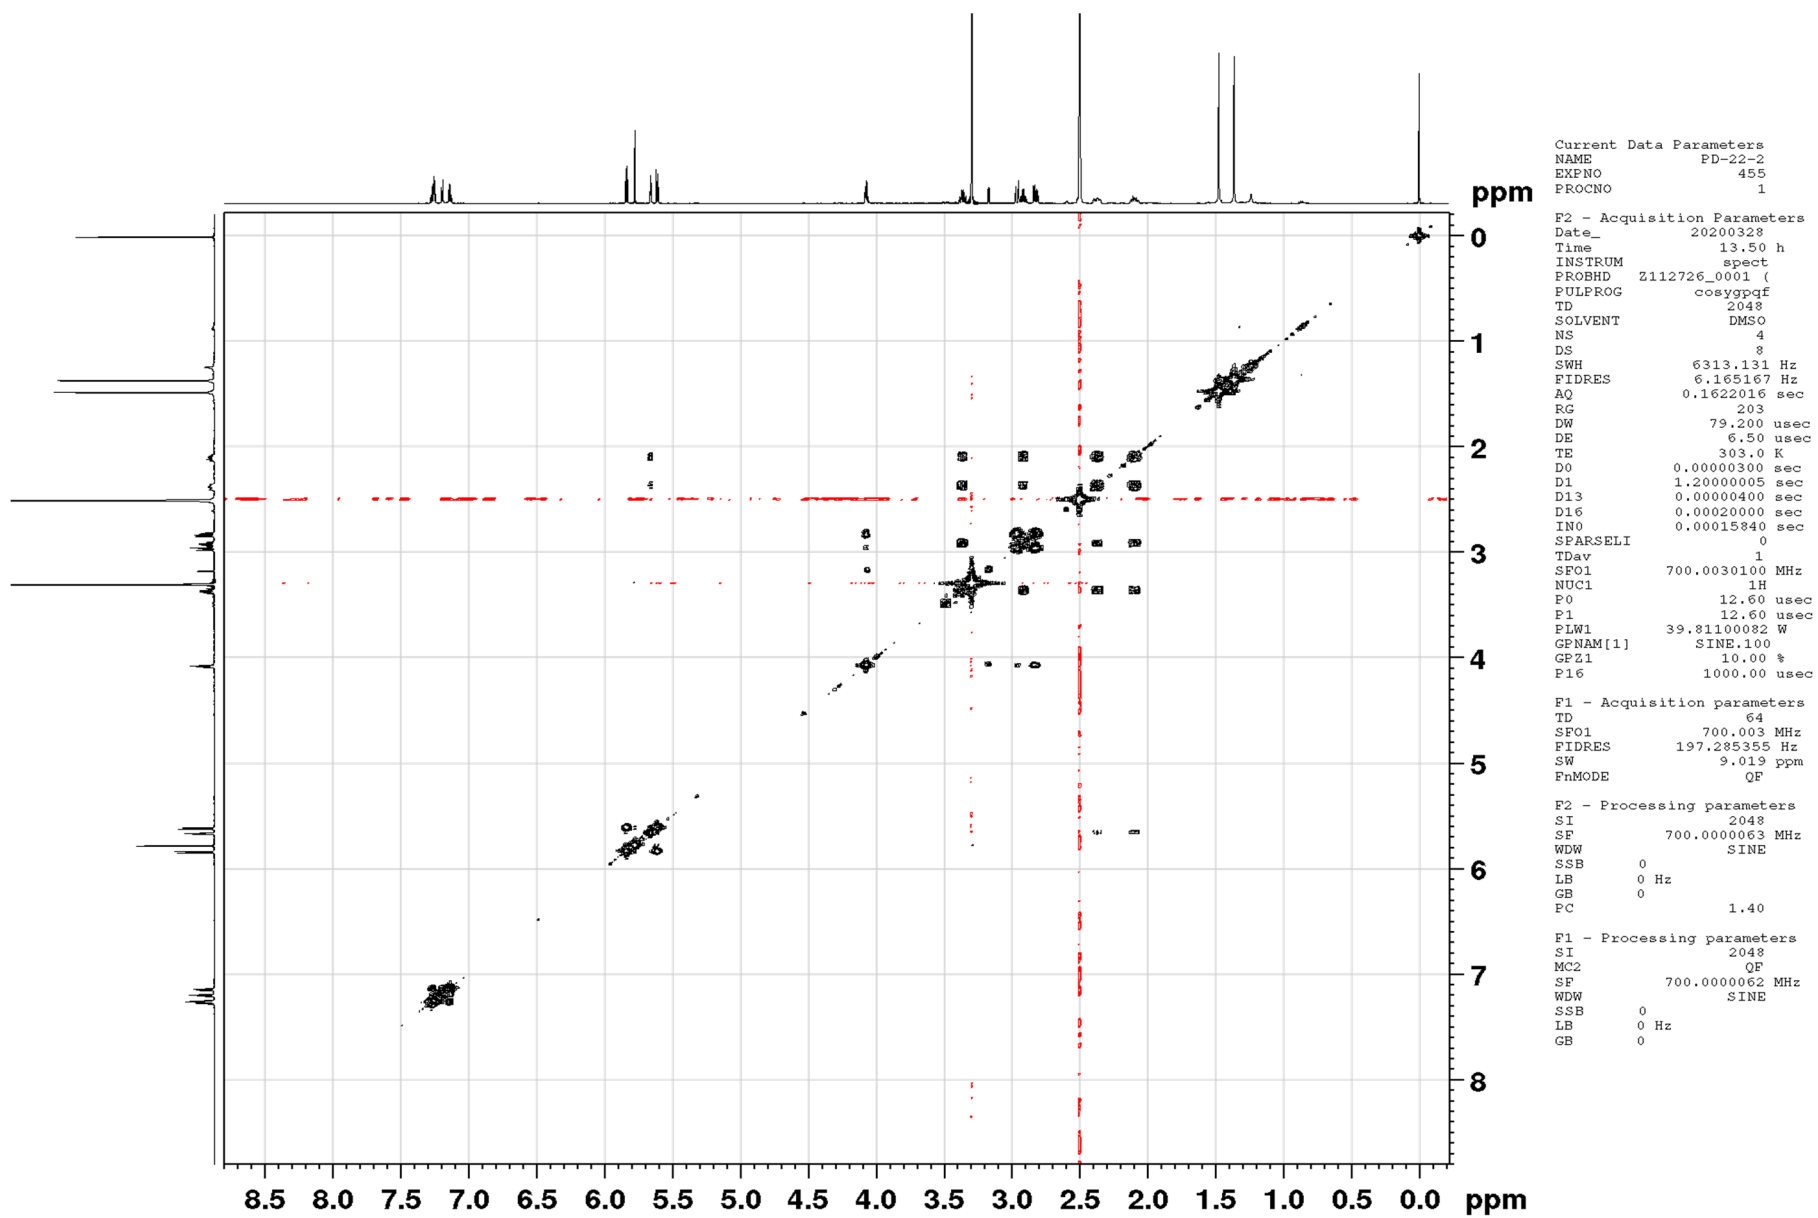

Figure S67. COSY-45 spectrum (700 MHz, DMSO-d<sub>6</sub>) of 4

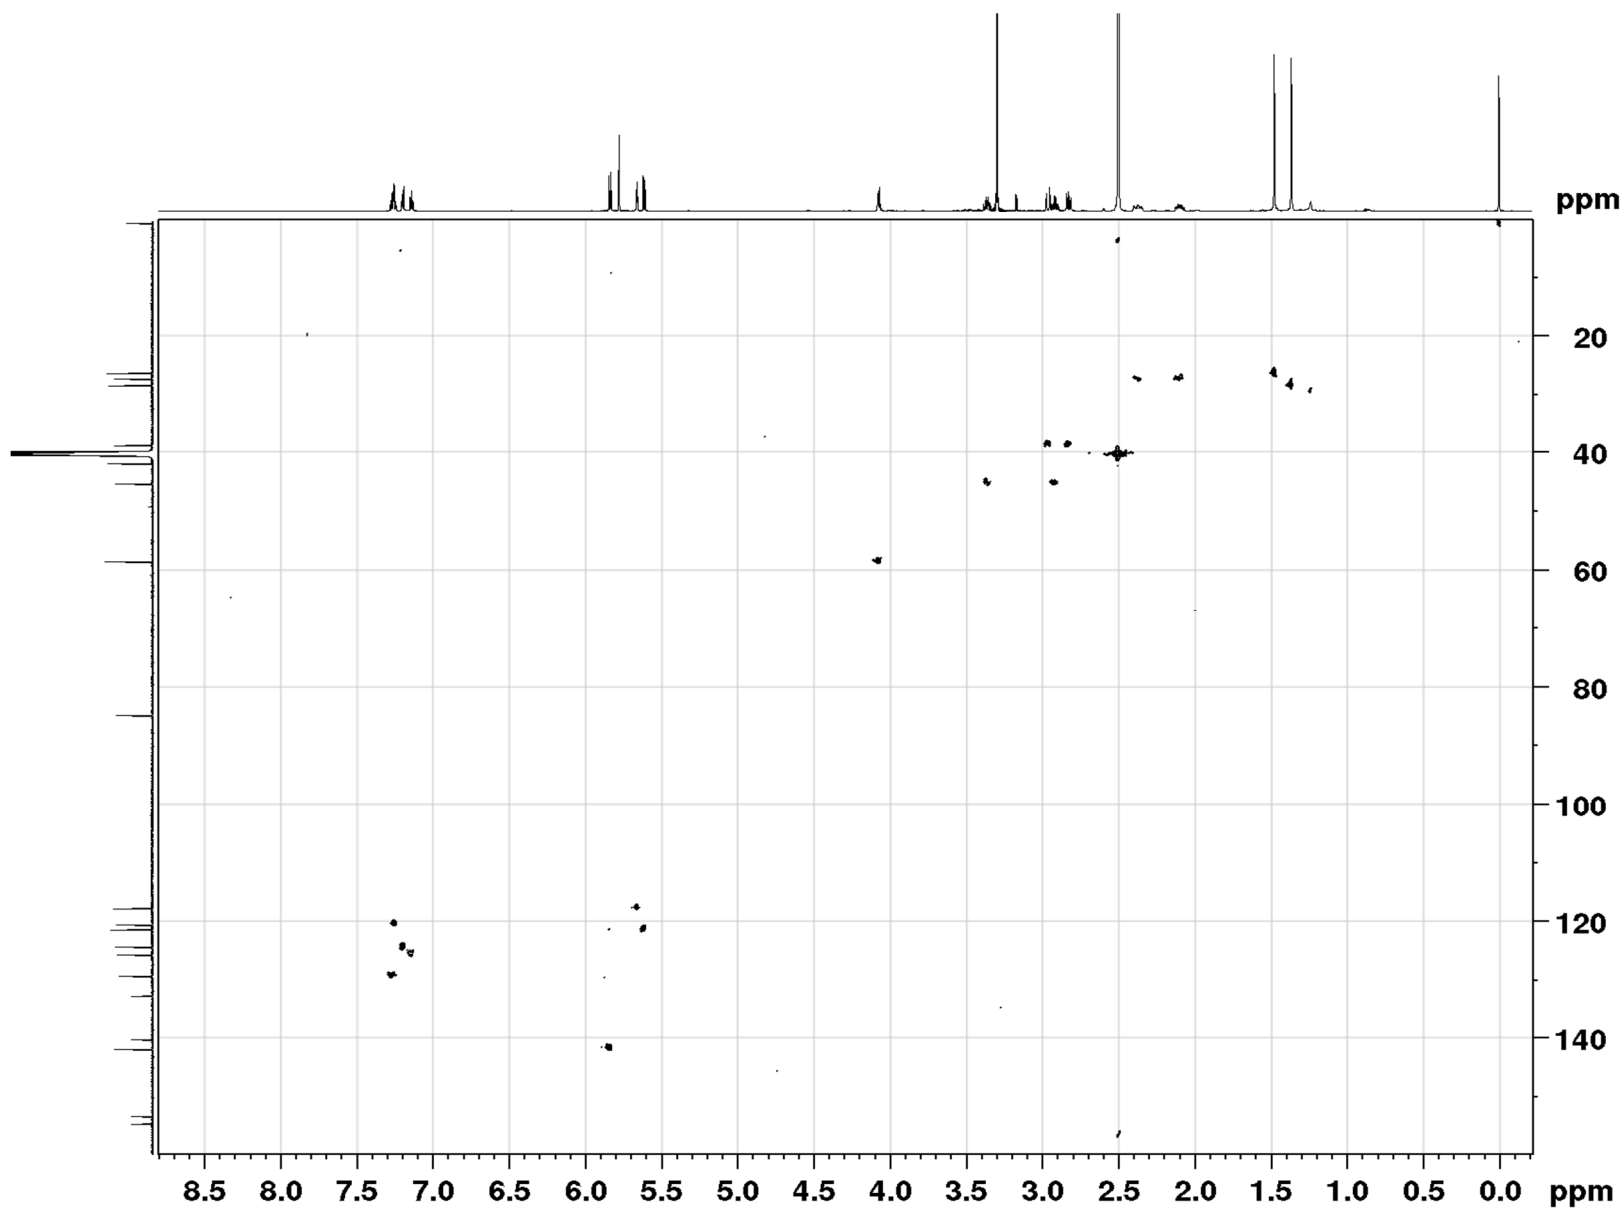

```

Current Data Parameters
NAME          FP-22-2
EXPNO        7130
PROCNO       1

F2 - Acquisition Parameters
Date_        20200330
Time         11.09 h
INSTRUM      spect
PROBHD       E112726_0001 (
PULPROG      hsqcetgpsisp2.2
TD           2048
TE           303.2 K
SOLVENT      DMSO
NS           8
DS           48
SWH          6313.131 Hz
FIDRES       0.165167 Hz
AQ           0.1622016 sec
RG           503
DW           79.200 usec
DE           6.50 usec
TE           303.2 K
CONST2       145.0000000
CONST17      -0.5000000
D0           0.0000000 sec
D1           1.5000000 sec
D4           0.00172414 sec
D11          0.03000000 sec
D16          0.00020000 sec
D24          0.00100000 sec
IHO          0.00001780 sec
SPARSELI     0
TDav         1
SFO1         700.0030100 MHz
NUC1         1H
F1           12.60 usec
F2           25.20 usec
F28          1000.00 usec
PLW1         39.81100082 W
SFO2         176.0292202 MHz
NUC2         13C
CPDPRG2      bi_p5m4sp_4sp.2
F3           10.70 usec
F14          500.00 usec
F24          2000.00 usec
F63          1500.00 usec
PLW0         0 W
PLW2         35.48099899 W
PLW12        1.34290004 W
SENAM[3]     Crp80,0.5,20.1
SFOAL3       0.500
SFOFFS3      0 Hz
SEW3         8.27550030 W
SENAM[7]     Crp80comp.4
SFOAL7       0.500
SFOFFS7      0 Hz
SEW7         8.27550030 W
SENAM[14]    Crp42,1.5,20.2
SFOAL14      0.500
SFOFFS14     0 Hz
SEW14        3.47569990 W
SENAM[31]    Crp42,1.5,20.2
SFOAL31      0.500
SFOFFS31     0 Hz
SEW31        0.86892998 W
GENAM[1]     SINE.100
GPE1         80.00 %
GENAM[2]     SINE.100
GPE2         20.10 %
GENAM[3]     SINE.100
GPE3         11.00 %
GENAM[4]     SINE.100
GPE4         -5.00 %
F16          1000.00 usec
F19          800.00 usec

F1 - Acquisition parameters
TD           64
SFO1         176.0292 MHz
FIDRES       877.808960 Hz
SH           159.575 ppm
FAMODE       Echo-Antiecho

F2 - Processing parameters
SI           2048
SF           700.0000057 MHz
WDW          QSINE
SSB          2
LB           0 Hz
GB           0
PC           1.00

F1 - Processing parameters
SI           4096
MC2          echo-antiecho
SF           176.0151441 MHz
WDW          QSINE
SSB          8
LB           0 Hz
GB           0

```

Figure S68. HSQC spectrum (700 MHz, DMSO-d<sub>6</sub>) of 7

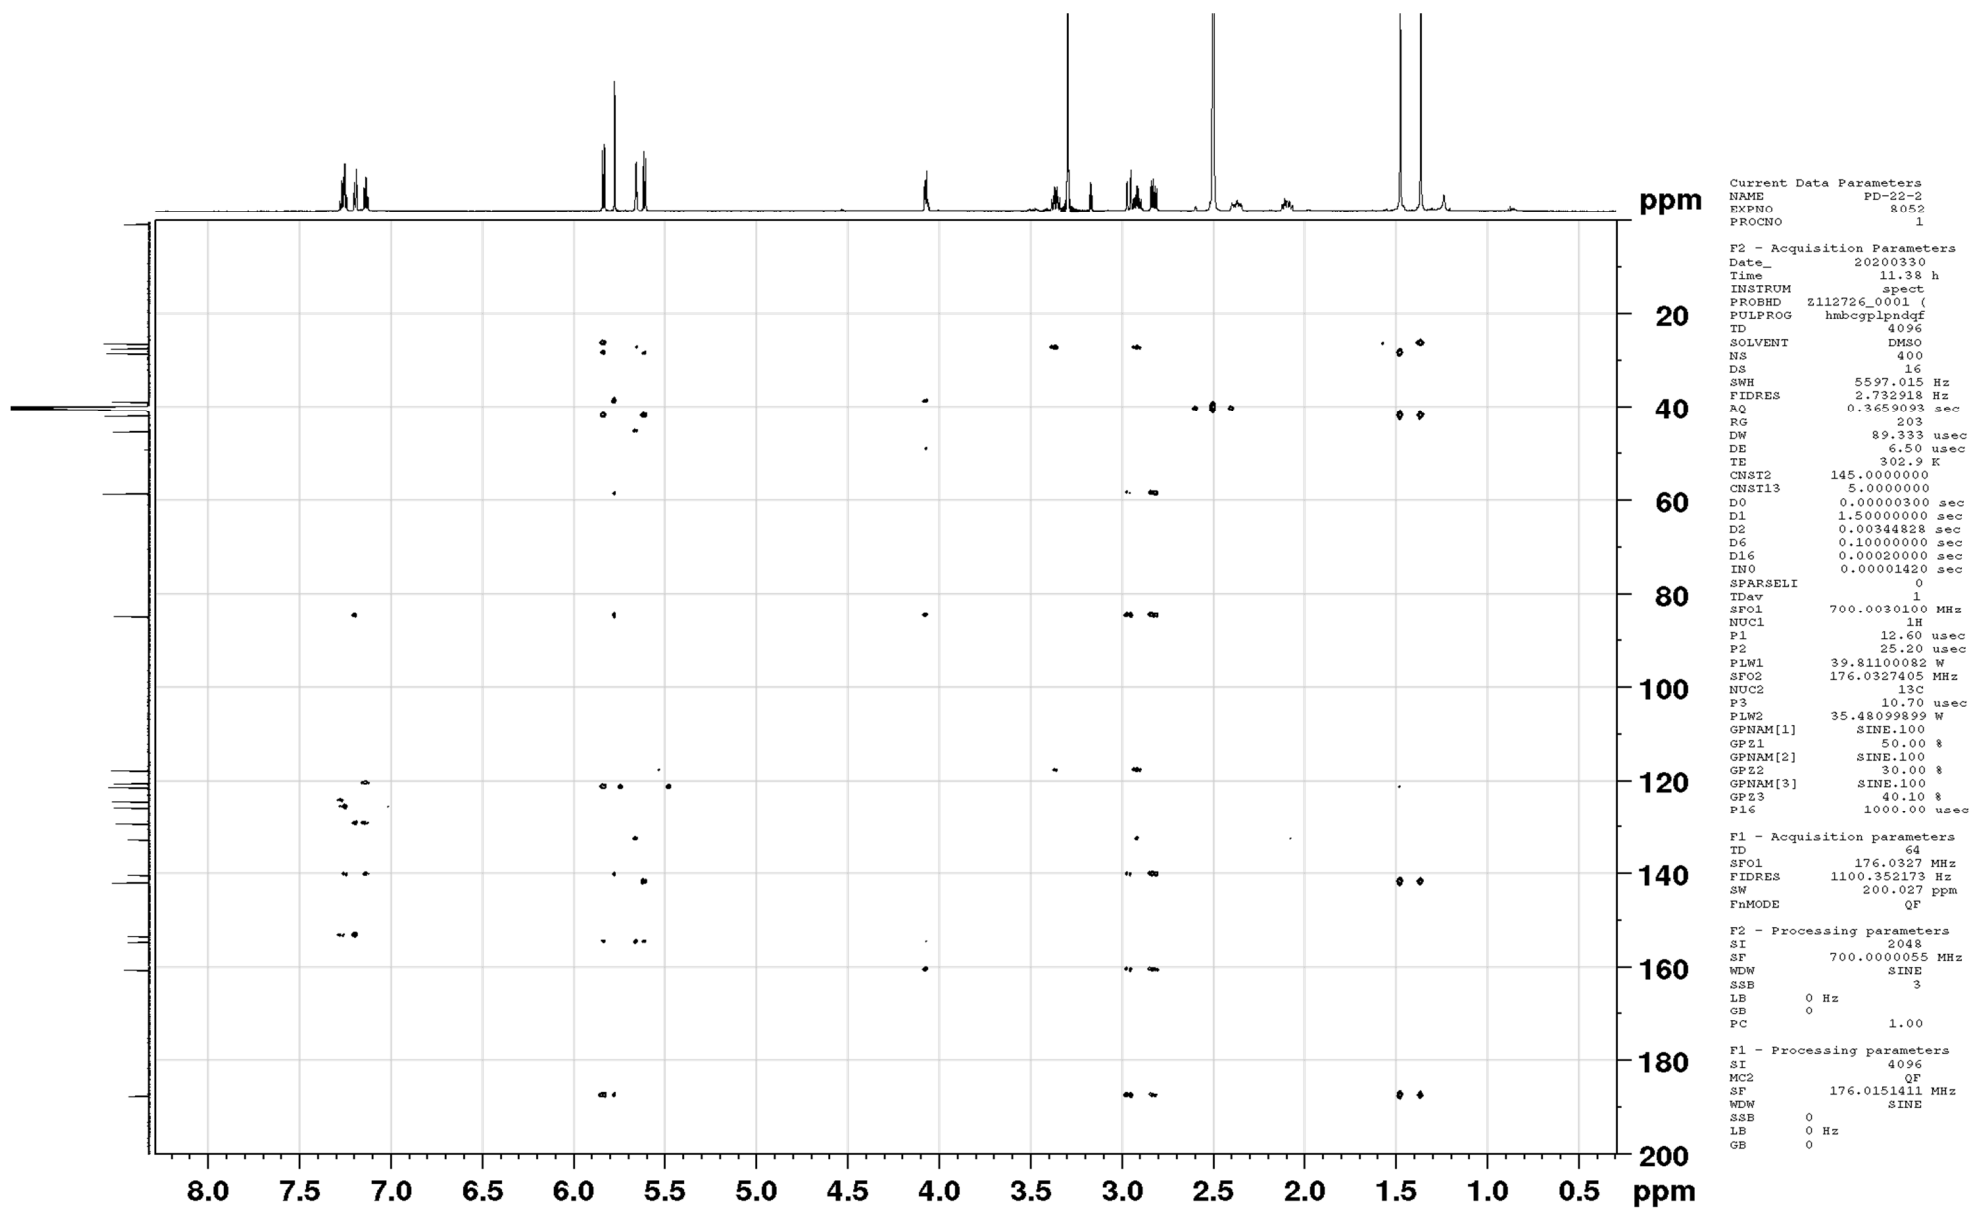

Figure S69. HMBC spectrum (700 MHz, DMSO-d<sub>6</sub>) of 7



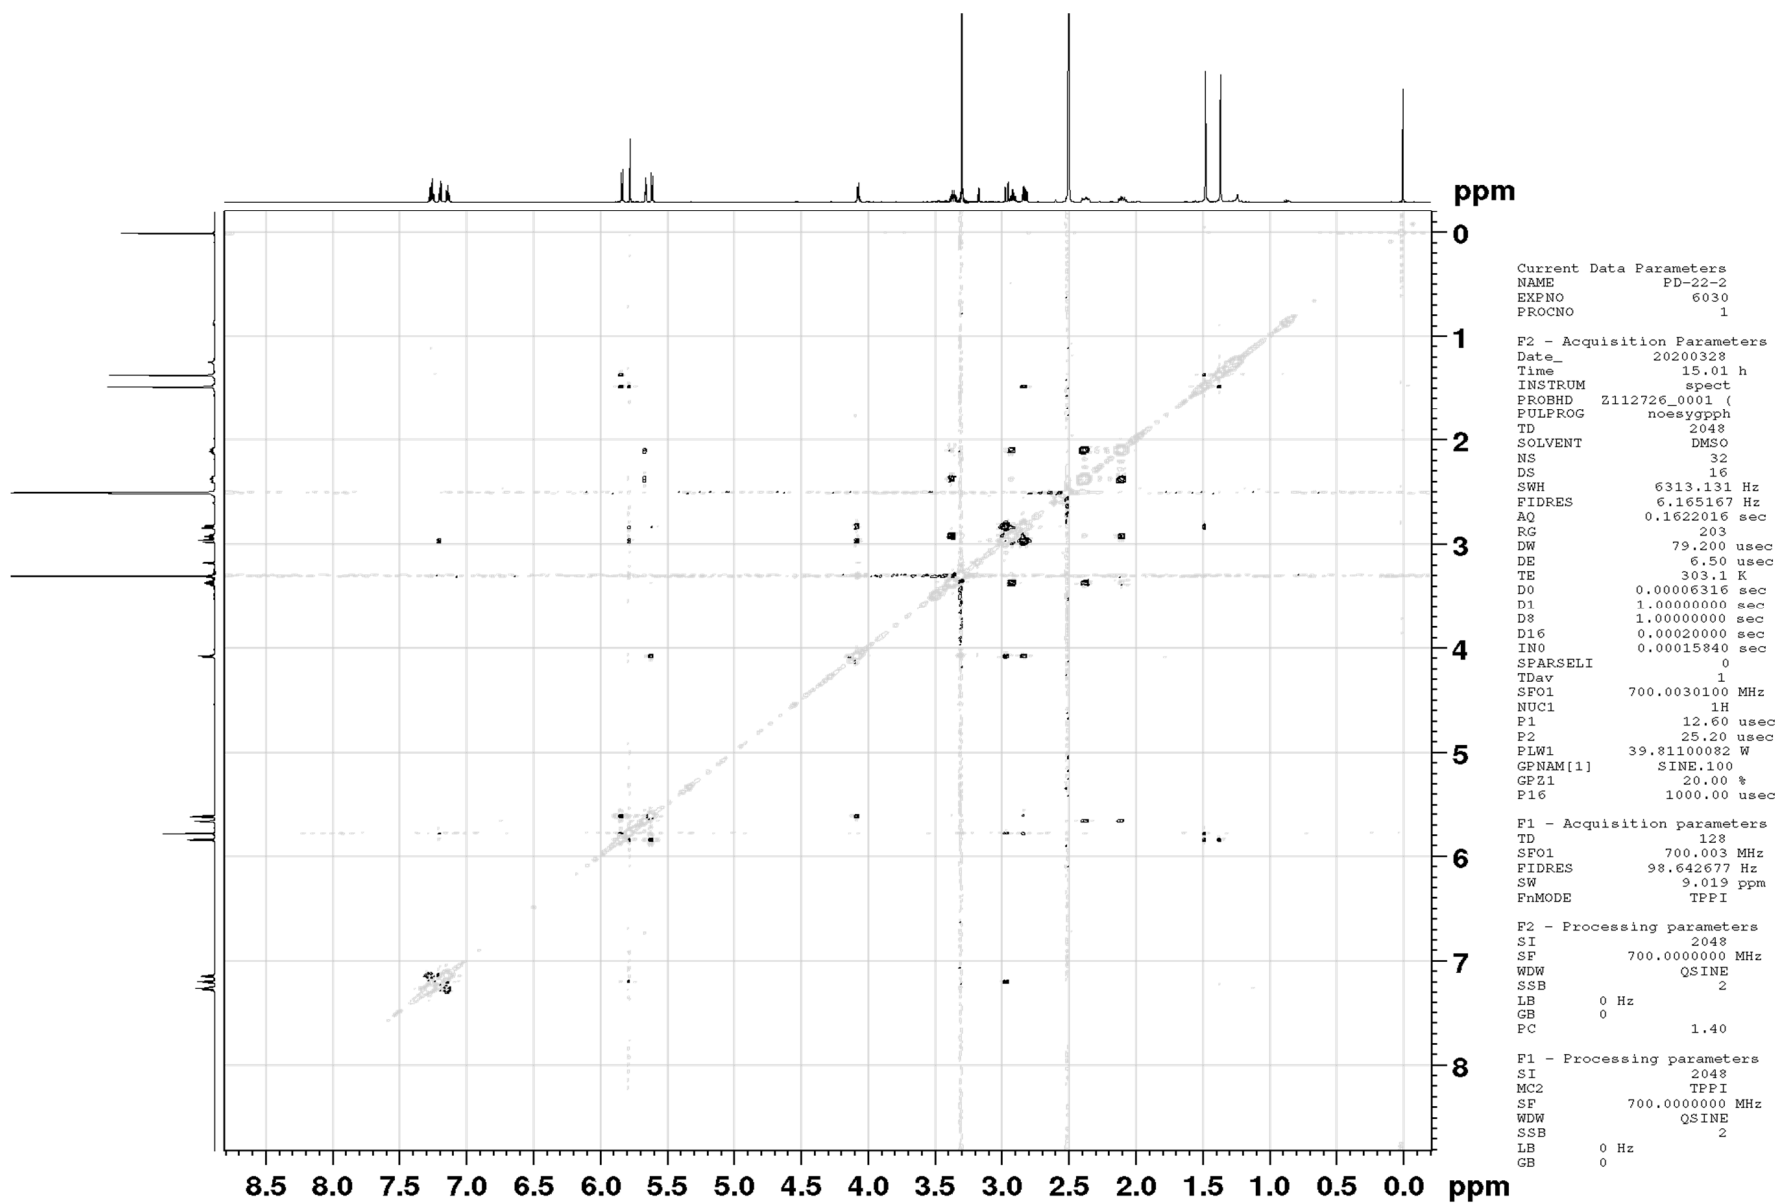

Figure S70. NOESY spectrum (700 MHz, DMSO-d<sub>6</sub>) of 7

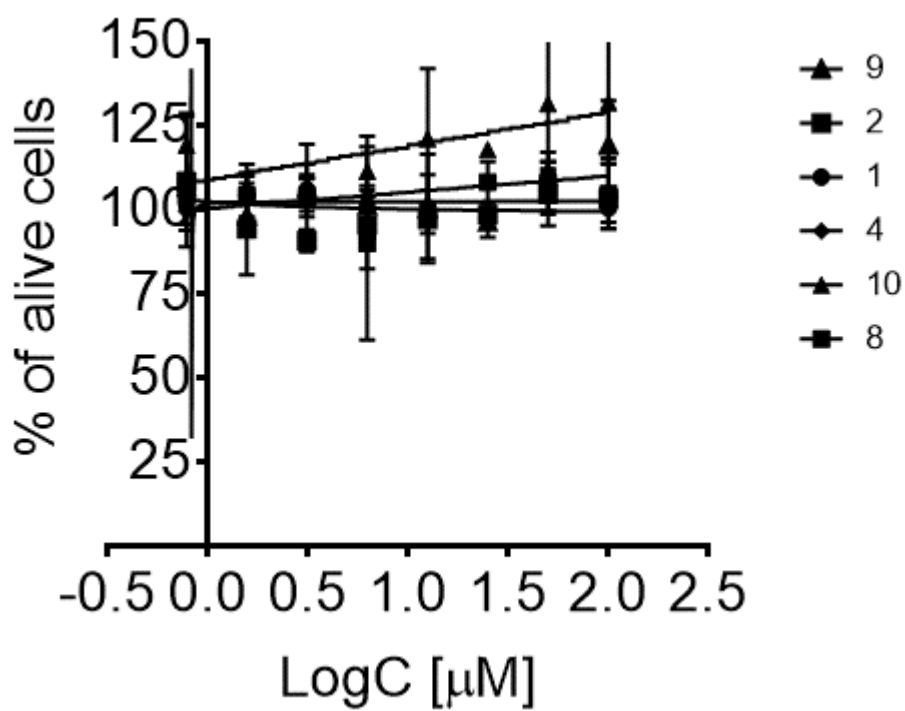

**Figure 71.** Viability of human prostate PNT2 cells treated with the investigated compounds for 48 h. No significant cytotoxicity was observed for the concentrations of the drugs up to 100 μM.

Table S1 Selected crystal data and refinement parameters for structure **1**.

---

|                                                         |                                                              |
|---------------------------------------------------------|--------------------------------------------------------------|
| Formula weight                                          | 395.45                                                       |
| Temperature (K)                                         | 298(2)                                                       |
| Radiation type                                          | Mo K $\alpha$                                                |
| Space group                                             | P2 <sub>1</sub> 2 <sub>1</sub> 2 <sub>1</sub>                |
| Unit cell dimensions (Å)                                | a = 7.5507(3),<br>b = 12.1354(6),<br>c = 21.985(1)           |
| V (Å <sup>3</sup> ) / Z                                 | 2014.5(2), 4                                                 |
| D <sub>calc</sub> (g/cm <sup>3</sup> )                  | 1.304                                                        |
| $\mu$ , mm <sup>-1</sup>                                | 0.091                                                        |
| F(000)                                                  | 840                                                          |
| Crystal size (mm)                                       | 0.45 × 0.41 × 0.28                                           |
| $\theta$ range (°)                                      | 1.853 - 32.041                                               |
| Range of <i>h</i> , <i>k</i> and <i>l</i>               | -11 ≤ <i>h</i> ≤ 7, -16 ≤ <i>k</i> ≤ 18, -32 ≤ <i>l</i> ≤ 32 |
| Reflections                                             | 35597/6978/6055                                              |
| measured/ unique / with $I > 2\sigma(I)$                | R <sub>int</sub> = 0.0205                                    |
| Goof                                                    | 1.030                                                        |
| Final R indices [ $I > 2\sigma(I)$ ]                    | R1 = 0.0406, wR2 = 0.1116                                    |
| R indices (all data)                                    | R1 = 0.0484, wR2 = 0.1179                                    |
| $\Delta Q_{\min}$ $\Delta Q_{\max}$ (e/Å <sup>3</sup> ) | -0.207, 0.208                                                |

---

Table S2 Selected bond lengths (d, Å) in the structures **1**.

---

|             |          |
|-------------|----------|
| O(1)—C(4)   | 1.224(2) |
| O(2)—C(9)   | 1.231(2) |
| O(3)—C(6)   | 1.415(2) |
| O(4)—C(5)   | 1.402(2) |
| O(4)—C(22)  | 1.417(2) |
| N(1)—C(4)   | 1.344(2) |
| N(1)—C(3)   | 1.437(2) |
| N(1)—C(10)  | 1.464(2) |
| N(2)—C(9)   | 1.335(2) |
| N(2)—C(5)   | 1.456(2) |
| N(2)—C(8)   | 1.476(2) |
| N(3)—C(18)  | 1.373(2) |
| N(3)—C(19)  | 1.379(2) |
| C(1)—C(2)   | 1.504(3) |
| C(1)—C(19)  | 1.515(2) |
| C(1)—C(20)  | 1.534(3) |
| C(1)—C(21)  | 1.555(3) |
| C(2)—C(3)   | 1.323(3) |
| C(4)—C(5)   | 1.525(2) |
| C(5)—C(6)   | 1.531(2) |
| C(6)—C(7)   | 1.529(3) |
| C(7)—C(8)   | 1.535(3) |
| C(9)—C(10)  | 1.518(2) |
| C(10)—C(11) | 1.539(2) |
| C(11)—C(12) | 1.491(2) |
| C(12)—C(19) | 1.373(2) |
| C(12)—C(13) | 1.429(3) |
| C(13)—C(14) | 1.405(3) |
| C(13)—C(18) | 1.406(3) |
| C(14)—C(15) | 1.382(5) |
| C(15)—C(16) | 1.387(6) |
| C(16)—C(17) | 1.369(5) |
| C(17)—C(18) | 1.391(3) |

---

Table S3 Hydrogen bonds for structure **1**.

| D—H...A                        | d(D—H)  | d(H...A) | d(D...A) | <(DHA) |
|--------------------------------|---------|----------|----------|--------|
| N(3)—H(3A)···O(1) <sup>i</sup> | 0.94(3) | 2.01(3)  | 2.909(2) | 159(2) |
| O(3)—H(3)···O(2) <sup>ii</sup> | 0.87(3) | 1.97(3)  | 2.825(2) | 170(3) |

Symmetry transformations used to generate equivalent atoms:

(ii)  $-x, y-1/2, -z+1/2$ ; (iii)  $x-1/2, -y+3/2, -z$
